# Supplementary material for: Thymic stromal lymphopoietin limits primary and recall CD8+ T-cell anti-viral responses
Source: eLife. 2021 Jan 13;10:e61912. doi: 10.7554/eLife.61912 (PMC7806261; doi:10.7554/eLife.61912)
Supplement: Supplementary file 1. — Related to Figure 3A. [file elife-61912-supp1.xlsx]

## Sheet: naïve TSLP 4h
rownames.diffexp.	media.0h	media.4h	media.24h	TCR.TSLP.4h	TCR.TSLP.24h	media.TSLP.4h	media.TSLP.24h	TCR.media.4h	TCR.media.24h	logFC	logCPM	PValue	FDR
Arsb	6.51845	7.9035	15.3566	3.48635	1.8123	81.896	10.2486	4.23235	1.956	3.39937	5.99173	0	0
Xkrx	14.7844	17.411	29.6917	6.95179	1.71789	171.654	22.8467	9.48702	1.47226	3.32161	6.57168	0	0
Bcl2	32.235	5.08755	8.3815	36.0171	29.7086	32.5276	35.2649	18.5245	23.0443	2.67316	7.52437	0	0
Ufl1	13.7384	10.7074	91.6509	34.4903	6.97685	62.1805	12.0853	40.3117	6.86928	2.4469	7.16522	0	0
Ube3a	19.6387	13.6713	47.0015	26.7644	24.0342	35.8642	15.813	27.7735	20.2976	1.32127	7.10495	0	0
Lars2	159.703	223.952	1402.03	405.823	447.728	465.75	203.658	876.84	163.614	1.0652	10.9656	0	0
Wdr92	142.513	207.078	139.06	220.183	221.699	366.008	139.482	178.323	181.885	0.821241	9.48401	2.99419e-273	3.63367e-270
Usp17la	1.81133	1.88973	35.3333	1.05636	0.60708	8.96221	3.4434	1.65898	0.542974	2.31752	4.00365	1.79132e-192	1.90216e-189
Prnp	15.6361	10.2791	15.7939	18.3531	9.57878	23.1824	12.608	17.4133	7.52102	1.08984	5.82637	1.1487e-184	1.08424e-181
Rpl39	2537.72	1503.17	1409.99	2099.28	1867.92	2404.62	1294.6	1842.73	1461.22	0.678802	9.55744	6.105e-182	5.18619e-179
Hnrnpa3	256.229	154.839	115.125	410.735	399.222	244.823	105.207	354.064	327.916	0.661667	10.4654	1.71223e-179	1.32231e-176
Kbtbd11	57.6033	36.0313	44.1613	68.8649	31.812	57.5518	64.7156	75.341	26.8952	0.67367	8.55614	3.06541e-151	2.17006e-148
Luc7l2	76.8581	70.6987	55.371	116.491	61.0767	109.633	50.8506	115.498	54.753	0.635021	8.70719	2.57347e-145	1.68167e-142
Sh3bp1	59.4509	32.4391	36.785	24.4421	37.4637	58.959	73.4853	17.3597	46.7513	0.862235	6.43356	3.85817e-139	2.34108e-136
Ttyh3	24.1082	101.406	91.9368	24.056	9.37888	67.6568	118.261	32.5197	12.5225	-0.58604	8.07028	6.54887e-117	3.47704e-114
Gltscr1	19.3289	35.6008	30.5973	8.95704	4.84748	22.3232	35.6176	12.2809	7.33281	-0.684766	6.82294	1.43071e-112	7.14935e-110
Gvin1	44.4643	9.43547	10.3599	53.3559	36.0209	15.433	13.3797	54.5987	26.8753	0.71337	8.09146	4.13626e-110	1.84935e-107
Prpf39	39.6855	23.4098	25.7511	18.7792	19.6172	37.6605	23.2178	17.4387	15.3227	0.696654	6.72473	8.94903e-110	3.8011e-107
Mfsd11	27.1097	8.68594	10.6817	11.614	6.99142	17.479	9.62112	10.1801	6.39971	0.968662	5.29915	6.49679e-107	2.6281e-104
Rbm38	75.264	80.5998	89.8783	72.252	55.9046	49.4038	98.6174	80.0428	88.8962	-0.707421	7.15875	2.056e-105	7.93897e-103
Itgb3	12.5357	4.37945	6.89871	2.86338	2.11339	8.66046	12.5334	2.21198	1.78198	0.985714	5.21299	1.8803e-102	6.94485e-100
Arglu1	120.789	61.2924	73.7286	142.561	68.7828	96.3564	70.1955	131.328	62.264	0.653566	7.36136	2.11374e-102	7.48175e-100
Rpl22l1	282.4	162.6	132.824	396.366	381.169	261.777	123.323	341.8	277.423	0.702672	7.01309	2.52343e-100	8.57462e-98
Zyx	74.0199	103.161	117.979	85.0794	43.7045	68.3591	135.205	107.08	57.2898	-0.592547	7.82459	1.35867e-98	4.27477e-96
Ssb	128.857	70.0459	63.8666	213.075	182.731	105.461	55.2609	180.675	162.46	0.599181	8.11617	2.61627e-97	7.40841e-95
Zfp943	13.5416	4.52303	5.69619	4.9151	5.83861	10.7788	4.71697	3.30394	3.78066	1.26977	4.17475	2.86913e-97	7.86234e-95
Rabac1	47.1198	147.915	149.179	57.5454	32.2328	92.1377	173.9	61.4914	47.7103	-0.693112	6.39512	3.91361e-95	1.03894e-92
Rai1	14.66	24.9156	25.2038	13.751	9.30042	16.1841	29.15	17.1927	12.6006	-0.62551	7.14143	1.4273e-94	3.67423e-92
Xpo1	39.3479	25.7675	18.4612	11.9302	70.1011	38.5563	17.3654	10.9527	56.1318	0.591058	7.41939	2.07448e-90	4.7629e-88
Tfrc	18.6381	8.3287	7.03785	144.981	154.258	14.2873	11.7916	128.393	128.651	0.791125	8.39502	1.66219e-87	3.28379e-85
Rnpepl1	18.7884	47.7766	46.4197	16.3915	21.2809	31.0439	53.5844	19.5613	29.2574	-0.633278	6.67212	2.26524e-85	4.27626e-83
Zfp932	30.754	9.88541	9.74944	11.6078	21.4614	18.956	8.36464	9.66145	14.7388	0.973497	5.02197	4.30978e-81	7.17875e-79
Ms4a6c	27.234	20.8905	24.7513	18.3747	13.7484	35.352	22.5341	14.0861	9.10187	0.760451	5.33573	4.50182e-78	6.7093e-76
Zfp942	14.8954	4.96602	4.75797	4.16552	6.96558	9.8742	3.82968	3.89483	5.0396	1.0184	4.4674	1.78467e-74	2.36888e-72
Srebf1	13.3862	23.5838	13.5447	15.3706	14.0843	15.1526	18.1115	18.9057	19.6815	-0.64763	6.24768	5.01946e-73	6.17976e-71
Tbxa2r	16.2417	36.0799	43.4442	7.11982	8.51953	21.9134	54.2692	8.65286	12.2838	-0.729163	5.60663	1.41437e-71	1.60201e-69
Map1s	9.48273	18.7712	12.8304	15.7008	8.85535	11.0809	15.688	20.9141	16.5807	-0.753633	5.629	2.03232e-70	2.27165e-68
Igfbp4	45.0541	3.58601	2.55375	3.7986	14.732	8.81118	9.57363	2.14641	17.1179	1.28869	4.68809	4.37601e-66	4.17688e-64
Tnfsf8	14.1398	3.45083	7.62569	55.7039	91.1333	8.26387	12.2441	34.404	74.5198	1.26675	6.23456	3.83761e-65	3.50543e-63
Tnfrsf9	3.26646	1.14981	0.919209	403.459	211.803	4.10115	0.581321	390.755	187.245	1.98874	8.14884	1.20331e-64	1.05383e-62
Zfp758	8.61121	2.98541	3.52996	3.3012	4.2468	6.76825	2.52631	2.58878	2.73057	1.202	3.66584	1.55287e-63	1.3061e-61
Irf2bpl	16.565	25.3908	27.882	5.86642	7.16257	16.8857	33.0162	7.72066	10.8584	-0.588199	6.2134	2.9365e-63	2.39861e-61
Jak3	25.655	19.7739	13.1587	21.5168	24.2154	12.6777	18.1069	26.9115	34.9891	-0.646518	6.48012	6.41071e-62	5.0425e-60
Nckap5l	11.3409	17.8044	19.3625	8.98504	3.68446	11.6324	25.8785	10.7691	5.36741	-0.618902	6.04957	2.50825e-61	1.9196e-59
Fmr1	19.3524	13.955	12.3215	16.4192	21.5086	20.8777	11.7862	14.9686	17.6773	0.591149	6.24556	1.15981e-60	8.6426e-59
Vmn1r58	29.8976	14.9117	26.9141	16.8013	7.37676	23.4413	19.6417	16.8196	5.60892	0.678684	5.66874	2.66959e-60	1.90573e-58
Lypla2	37.475	57.6931	40.2014	46.3017	42.3544	38.5158	51.3249	49.9434	62.2889	-0.58647	6.30075	5.41813e-58	3.4869e-56
Abhd8	25.3188	26.2535	49.4854	7.02351	10.0999	15.9396	62.4098	9.98555	16.9706	-0.724127	5.72871	1.57705e-57	1.0073e-55
Med25	10.3996	21.9286	16.5441	14.9835	14.7138	13.4464	19.8553	18.0891	23.2324	-0.705897	5.34313	2.1445e-53	1.12454e-51
Zfp300	1.4976	4.04818	63.4596	1.33092	0.778301	1.79693	7.11004	1.56967	0.823112	-1.12285	5.49787	2.66446e-53	1.38863e-51
Klhdc2	18.6558	14.505	13.5498	18.3047	25.8555	23.6901	19.1583	11.8078	25.2922	0.707191	5.27176	3.02554e-53	1.5577e-51
Ubl7	24.8016	46.9813	37.1045	26.4984	29.482	30.2009	45.5124	28.9762	34.1156	-0.63301	5.60234	3.37706e-53	1.71785e-51
Cd84	11.8186	7.10284	9.54043	14.8819	5.92643	11.8714	7.93915	14.6885	4.051	0.736858	5.16215	4.98301e-53	2.51969e-51
Tceb1	41.2947	21.5178	23.5203	75.3814	87.8274	36.956	19.7771	66.7586	69.3349	0.794596	5.59039	1.05393e-52	5.20533e-51
Emc10	30.0571	34.9647	27.1035	34.1898	38.3938	22.7576	33.3257	36.9649	54.1991	-0.622754	6.06362	1.7026e-51	7.94701e-50
Hba-a1	7.19801	0.855231	11.7991	11.3684	0.134442	7.79463	0.685434	9.75085	0.122222	3.025	1.46165	8.51165e-51	3.90846e-49
Hba-a2	7.14687	0.849155	11.7153	11.2876	0.133487	7.73925	0.680564	9.68158	0.121354	3.025	1.46165	8.51165e-51	3.90846e-49
Hbb-b1	3.5295	0.4644	12.6317	10.0332	0.029155	5.8562	0.188662	9.01382	0.0817306	3.5142	1.37069	2.0927e-50	9.44795e-49
Hbb-bs	3.48531	0.458586	12.4735	9.90756	0.02879	5.78288	0.1863	8.90097	0.0807073	3.5142	1.37069	2.0927e-50	9.44795e-49
Ahdc1	6.69151	10.5502	7.64899	3.20508	4.33154	6.99165	8.77303	4.1168	6.66862	-0.593813	5.52264	6.93057e-50	3.08247e-48
Il2ra	3.31369	4.51288	43.565	279.604	176.776	7.59514	5.04842	225.645	175.449	0.811796	8.82572	8.80639e-50	3.89637e-48
Zfp182	10.111	6.6295	5.48855	4.42317	3.24089	10.0714	5.32143	4.33726	2.57604	0.615015	5.1892	2.00847e-49	8.8404e-48
Scand1	12.4688	26.8875	37.2399	14.7398	4.8537	13.3111	46.5267	23.8994	25.272	-1.01818	4.21149	3.09169e-47	1.23305e-45
Sec61g	63.8967	35.2449	34.908	95.3203	114.371	56.0785	33.572	81.0901	94.9825	0.666979	5.76384	2.73939e-46	1.03427e-44
Fzr1	8.16105	20.7581	10.9833	13.0674	13.129	13.0371	12.9311	13.5389	17.5682	-0.663565	5.0195	2.8215e-46	1.06056e-44
Mbnl3	4.18752	3.08168	3.15241	1.97203	5.37102	4.91421	2.67189	1.72579	4.49706	0.677265	4.9949	3.82697e-46	1.43216e-44
Slc30a4	6.24116	4.2647	3.23419	12.7717	11.192	6.90371	5.02889	10.5581	9.44279	0.707857	5.44925	2.48157e-45	8.97061e-44
Zfp120	8.73757	4.42036	4.84823	3.42078	7.47924	7.54371	4.6107	2.74358	5.56629	0.766032	4.55975	5.94897e-45	2.07117e-43
Lrif1	21.5687	9.02723	10.2384	6.45793	7.75352	13.7859	9.85227	5.57086	5.90066	0.634029	5.2619	7.0285e-45	2.43702e-43
Pbld1	7.36078	3.46125	5.30189	11.5947	5.67988	7.64337	3.94007	9.91704	3.65616	1.11854	3.70241	2.00022e-44	6.76966e-43
Haus3	26.5797	17.7064	15.1201	14.0268	20.5484	26.6235	13.8368	12.0307	16.6738	0.612134	5.21592	2.84105e-43	9.1767e-42
Nt5e	3.78182	7.37775	9.5039	7.01395	1.90533	11.5751	10.7068	6.57615	2.0043	0.657692	4.67854	1.04338e-42	3.295e-41
Irs2	3.03568	9.33886	9.08822	1.85909	1.69527	5.81928	10.3895	2.72948	2.81764	-0.718203	4.49406	1.85699e-42	5.77845e-41
Zfp654	15.3245	7.69015	8.53157	7.57778	7.0091	11.4191	6.86508	7.38626	4.90606	0.586454	5.41	1.29236e-41	3.8657e-40
Grk4	21.3214	9.43362	12.6052	10.0562	4.7907	14.3259	8.29418	10.2785	3.86131	0.621197	5.16494	2.41441e-41	7.12167e-40
Chpf	3.71331	9.26538	6.12691	14.3149	6.61064	5.41984	7.3972	18.6181	10.9572	-0.75339	4.94168	2.86239e-41	8.41385e-40
Klhdc1	14.3384	8.26661	10.5775	7.72435	2.95662	14.1287	13.5273	6.14694	2.77043	0.773115	4.20568	2.93101e-41	8.58583e-40
Nabp1	26.8129	11.8042	9.0241	116.23	44.3148	17.6369	9.84672	103.509	36.3478	0.596537	6.90778	8.52589e-41	2.46352e-39
Hmgn5	30.1982	12.461	11.0998	13.6539	22.249	19.7888	9.87019	12.1293	19.7421	0.662454	5.05805	1.4695e-40	4.18906e-39
Taf1c	7.8819	15.7883	13.7446	16.6959	8.531	10.5357	15.5572	17.949	11.8062	-0.587954	5.4902	2.28277e-39	6.09815e-38
Xlr4b	43.883	24.5621	22.8299	48.0419	29.7729	36.9428	19.3548	41.5965	24.1702	0.590149	5.43838	2.55055e-39	6.79214e-38
Zfp935	13.3473	6.37794	4.52234	6.16584	8.6966	10.7888	4.63454	5.1228	6.18423	0.762939	4.23763	4.30588e-39	1.13952e-37
Slc7a14	4.62122	2.42995	4.15151	4.29491	2.69445	3.8746	2.50598	4.28979	1.96258	0.665502	4.98096	2.3624e-38	5.868e-37
Tigit	4.98214	2.63639	3.72146	3.25595	16.1356	7.50929	1.30077	3.62102	13.6936	1.55273	2.6662	3.18226e-38	7.83573e-37
Btbd2	7.41017	15.5891	12.3559	4.73664	4.14681	10.3562	15.4607	5.754	5.66763	-0.590688	4.87865	1.67229e-37	3.95712e-36
Cetn3	68.722	29.7735	25.3797	53.7912	83.3232	44.2025	23.6798	47.5261	71.232	0.587949	5.70266	1.22994e-36	2.79368e-35
Ube2v2	7.41663	3.60847	5.56889	11.8611	16.0541	5.67686	3.31629	10.8134	12.7998	0.662281	5.69573	1.31867e-36	2.98723e-35
Atp13a2	4.75222	9.84344	8.54804	2.85741	4.22646	6.46911	10.2213	3.62494	6.33213	-0.603139	4.86876	3.64539e-36	8.06449e-35
Xlr4a	42.1688	24.2044	22.8877	39.8809	28.1797	36.1197	19.1895	36.8196	24.538	0.591603	5.24005	4.75294e-36	1.04062e-34
Nudt14	12.7487	44.8088	88.7526	11.3783	5.82623	28.5084	91.0733	13.8129	7.66912	-0.653244	4.86193	5.27887e-36	1.1528e-34
Zfp574	4.88247	8.57499	7.37027	5.32513	4.68966	5.51153	9.63388	6.61541	6.87119	-0.652049	4.87517	1.21042e-35	2.59006e-34
Zbtb6	8.40917	5.68269	9.50621	7.41419	7.54461	8.57237	5.35428	6.57415	5.63044	0.609156	5.09159	3.28247e-35	6.88508e-34
Xcl1	8.59038	4.45989	8.09878	4987.63	1636.13	13.2167	2.01066	6371.51	1533.42	1.58203	9.66095	8.39759e-35	1.73149e-33
Pgls	13.7057	26.7546	24.9273	14.6554	22.6642	15.8103	35.792	18.1579	38.7109	-0.785222	4.45832	9.86137e-35	2.02349e-33
Rnpc3	7.36075	3.35078	5.51217	7.48572	4.48764	5.71027	4.28464	6.79408	3.46342	0.785259	4.44037	1.99581e-34	4.01762e-33
Cish	2.62549	1.90454	1.21431	116.944	59.988	4.33287	1.20832	36.9629	65.8387	1.22679	6.12158	2.52852e-33	4.75217e-32
Mcts1	33.1679	14.6203	12.2182	19.7198	61.2638	24.6757	10.962	18.545	46.1164	0.781003	4.60437	6.92078e-33	1.28367e-31
Nr4a2	2.12722	2.26594	0.971763	915.793	46.7946	4.37471	0.329159	907.289	42.9707	0.991745	9.40353	8.87365e-33	1.63518e-31
Jrkl	7.59565	5.91418	4.84827	4.44102	4.74198	9.38919	3.90449	3.6081	3.58779	0.674385	4.05364	1.38385e-32	2.52813e-31
Ap5b1	2.66576	5.78644	4.51622	1.53701	1.50276	3.16315	5.42902	2.30607	2.46554	-0.869721	3.44728	1.86982e-32	3.40862e-31
Crem	3.07514	3.12287	2.76063	77.7189	9.64083	5.68611	2.14987	57.2877	7.49047	0.903078	5.68231	9.32595e-32	1.65394e-30
Zfp52	9.40024	7.43607	2.5865	26.6127	35.2519	11.1087	2.24853	25.2268	28.2839	0.592653	5.72697	4.97679e-31	8.42187e-30
Cxcr2	7.48203	3.76333	6.63179	8.0853	4.14375	6.45953	3.73038	7.5761	3.05071	0.778215	4.15469	5.7289e-31	9.65615e-30
Mif	62.9913	67.5224	83.5547	289.33	439.37	45.4654	96.0977	294.97	674.075	-0.595693	6.99192	5.82847e-31	9.80453e-30
Bbc3	5.41308	18.3218	23.3976	6.37266	10.4684	12.1935	25.0504	9.02967	16.5001	-0.596608	4.89039	7.66402e-31	1.27909e-29
Zfp825	24.645	15.9222	17.6255	7.38954	15.3641	23.7482	14.8501	8.00617	12.3435	0.596744	4.50032	1.67875e-29	2.57884e-28
Lsm5	57.7842	35.5998	39.6917	60.5244	96.5215	54.9258	34.3227	55.1087	85.8453	0.634191	4.9084	5.04978e-29	7.56576e-28
Arhgap5	6.00679	3.45185	3.67234	2.45851	2.97657	5.33798	2.71129	2.50795	2.12912	0.63529	4.23919	6.6269e-29	9.89376e-28
Ppp1r16a	3.13092	12.4072	3.67014	4.5343	4.70771	8.24065	4.76994	5.20808	6.7032	-0.593661	4.05243	2.28175e-28	3.27423e-27
Abhd17a	11.6233	16.1504	20.161	7.56071	17.4674	10.0787	24.6606	8.73343	30.3415	-0.678824	4.66585	4.59754e-28	6.40264e-27
Olfr613	4.3715	3.88344	6.62847	3.74969	2.08207	5.89303	3.43568	4.36788	1.53157	0.589163	4.42314	6.68933e-28	9.16546e-27
Gtpbp6	9.69468	18.6361	19.6686	22.9553	8.75739	12.3052	20.9999	24.6423	12.7058	-0.593505	4.82444	4.81203e-27	6.22195e-26
Zbtb45	5.58714	9.92001	7.45024	2.92701	8.41879	6.17409	11.3879	3.98995	12.7966	-0.697231	4.12237	3.8685e-26	4.76966e-25
Pim3	6.71706	10.46	9.22645	61.9141	17.9031	6.73102	10.4031	64.584	24.819	-0.622362	5.86048	8.92741e-26	1.07878e-24
Comt	13.3182	8.07582	11.293	16.0185	22.1667	12.3518	8.28288	15.2681	24.3221	0.593665	5.02967	9.16249e-26	1.10248e-24
Igip	8.71822	8.27136	13.3355	5.86499	7.2625	13.449	9.82722	6.18305	5.42384	0.727027	3.66472	9.39486e-26	1.12725e-24
Sppl2b	5.83871	9.39714	6.53647	3.00908	4.76201	6.22305	8.11761	4.13882	6.32107	-0.623967	4.20673	9.9143e-26	1.1879e-24
Zfp959	10.7324	6.86418	6.3688	5.53585	6.22189	10.6228	5.57308	5.09545	4.81345	0.64999	3.88785	1.06982e-24	1.19896e-23
Dyrk1b	3.6068	11.2342	7.19238	4.75013	1.39237	7.57529	6.88715	5.61668	1.75625	-0.587801	3.90474	1.95174e-24	2.15046e-23
Sema7a	0.512167	0.280367	0.442306	404.875	38.4199	1.02023	0.167961	420.708	40.086	1.84069	8.36411	8.04167e-24	8.43383e-23
Foxr1	3.69008	1.69768	2.40177	4.59914	1.83494	3.91244	2.09606	3.71598	1.31807	1.16895	2.26713	1.23055e-22	1.18119e-21
Olfr56	2.70667	1.12102	1.33807	12.6538	10.003	2.80976	1.35219	9.39674	6.16752	1.28907	3.37864	2.18061e-22	2.05597e-21
Mfsd10	4.06543	6.57911	2.6946	2.97974	7.58465	3.64302	3.86715	2.9376	12.7697	-0.84324	3.35355	3.97276e-22	3.70457e-21
Tpgs1	6.3739	12.8206	9.68075	4.50515	3.97086	7.5863	14.5888	5.36362	9.89292	-0.791278	3.31357	5.29454e-22	4.87821e-21
Pole2	9.45396	3.7412	3.52583	5.43228	17.9707	6.69248	5.6905	3.77973	17.6717	0.842667	3.8614	5.3809e-22	4.95241e-21
Id3	15.7212	19.5596	12.6802	43.41	33.9289	12.2595	15.489	60.186	46.7308	-0.659337	4.82372	1.03254e-21	9.30161e-21
Fbxl8	4.57688	8.1984	6.42056	2.59509	1.89944	4.95183	8.25375	2.82703	2.79431	-0.712443	3.28229	2.65074e-21	2.30246e-20
Chst12	9.38288	9.28607	12.0852	2.49204	6.33369	5.79516	14.1391	2.85219	8.24713	-0.70192	3.90481	6.67346e-21	5.65215e-20
Gaa	6.16512	6.25526	11.658	5.08654	10.6529	4.23262	11.8461	6.00952	14.3037	-0.586708	5.06236	6.91236e-21	5.84865e-20
Ctla4	3.73166	2.87565	4.88374	1.34721	19.411	4.96272	3.61175	0.937842	16.6156	0.904476	3.72269	4.87776e-20	3.92021e-19
D3Ertd751e	5.20522	3.32923	3.75284	1.27051	1.58283	5.08161	3.60588	1.2883	1.21579	0.618968	3.46685	1.99116e-19	1.53633e-18
Mob1b	5.16824	3.63607	5.05781	7.58444	7.30156	5.59362	3.31466	7.18644	6.09395	0.621335	4.21205	2.64686e-19	2.03117e-18
Tex30	11.8386	8.35643	4.76176	21.8371	33.3092	12.9326	4.67829	17.6333	27.5959	0.643121	4.37097	3.9402e-19	2.98325e-18
Rhox8	4.45397	1.59708	4.46424	7.91793	1.34205	3.8995	3.13127	5.27686	1.38538	1.2953	2.15757	4.16991e-19	3.15436e-18
Zfp960	9.20796	3.48359	2.67314	2.7656	5.54206	5.4518	2.79596	2.83848	4.10771	0.692142	3.59017	6.23569e-19	4.67127e-18
Glmn	4.92222	3.35442	2.04422	3.92526	13.3891	5.6723	2.86868	3.5745	11.0318	0.753716	3.57636	1.48394e-18	1.08114e-17
Zfp433	6.77586	2.84548	2.69459	3.30089	2.94497	4.74459	1.69778	2.7826	2.16725	0.787232	3.03094	1.49599e-18	1.08898e-17
Znhit6	8.05462	2.82099	4.09908	31.5371	23.4644	4.63011	3.64618	27.9363	20.8018	0.695375	5.33045	1.73576e-18	1.25813e-17
Pdcd1	0.80855	0.649244	0.37451	71.8271	51.44	1.74441	0.341894	85.2429	56.3302	1.57847	5.84649	2.24194e-18	1.61537e-17
Zfp97	10.5441	4.16057	3.32103	3.90845	6.42487	6.24556	3.07161	3.74187	4.46128	0.617721	3.8729	3.51715e-18	2.50656e-17
Mrpl34	15.5389	27.7154	26.7562	10.5118	31.9176	18.109	30.3453	9.74494	41.4619	-0.600923	4.01484	4.07833e-18	2.89436e-17
Igsf8	3.36241	4.45996	6.59546	1.09326	4.0933	2.51883	6.67908	1.32452	6.81032	-0.821996	3.29927	5.53909e-18	3.89847e-17
Tfeb	4.05458	7.34514	6.30812	1.92905	2.84197	4.77782	8.04056	2.26276	4.25526	-0.609032	3.55617	7.244e-18	5.04408e-17
Nat6	4.64382	7.05116	5.85865	3.55384	3.30461	4.37215	7.66385	4.40921	4.10739	-0.674575	3.41593	7.61872e-18	5.30066e-17
Rpf2	19.581	4.69652	6.53287	69.2919	61.8927	7.34702	6.4805	62.2241	54.5079	0.692916	5.90809	9.17092e-18	6.34939e-17
Zfp948	2.62654	2.85716	1.3976	28.7297	12.6293	4.61944	0.950353	29.6561	10.6708	0.729626	4.77754	1.46413e-17	1.00386e-16
Ecm1	3.94037	4.08984	2.82613	14.9153	4.04061	6.4957	4.30776	14.3899	4.53745	0.709795	3.69649	2.35905e-17	1.59555e-16
Gpc1	1.8558	5.02396	2.36961	2.03038	3.25506	3.34312	1.69869	2.61491	3.978	-0.594479	3.4521	2.53889e-17	1.71309e-16
Dpm3	10.5108	19.1492	22.0123	11.3525	10.1586	10.7077	26.4572	13.4674	17.1125	-0.802124	3.0725	2.86663e-17	1.92202e-16
Phkg1	4.17328	2.14052	3.46535	5.01864	2.71224	3.81328	2.39024	4.86485	2.56012	0.821589	3.06993	3.14518e-17	2.10546e-16
Zfp944	8.98603	3.80895	3.4165	2.23464	4.23734	5.76813	3.60431	2.38238	3.11721	0.608313	3.60042	7.88334e-17	5.10434e-16
Slamf1	3.86074	1.24915	1.18102	269.029	46.8173	2.38301	1.04816	249.32	41.8414	0.981317	7.52235	1.18292e-16	7.56124e-16
Prr7	3.04038	6.00908	6.7387	2.79915	0.226556	3.27831	8.75009	4.17659	0.818635	-0.875566	2.57834	1.2603e-16	8.01363e-16
Zfp930	8.18473	3.03367	2.68839	3.85387	8.73346	4.63108	2.33569	3.38363	6.84906	0.644647	3.90816	3.38679e-16	2.08635e-15
Them6	11.9404	8.58581	14.0066	3.28514	12.4317	5.38428	16.962	4.49139	17.1798	-0.664391	4.05213	5.1382e-16	3.11112e-15
Dohh	6.55237	10.9052	10.7421	16.2031	14.7369	7.27993	13.3271	17.4336	21.9675	-0.615117	4.31926	5.20308e-16	3.14592e-15
Dusp4	1.21443	0.461787	0.101228	8.25222	11.485	1.17602	0.345527	13.3926	15.6858	1.51467	3.8459	3.486e-15	1.98749e-14
Mblac2	4.6829	2.53753	4.25768	1.15781	1.58155	3.77445	3.86361	1.0179	1.27075	0.595956	3.452	3.78958e-15	2.1519e-14
Slc39a4	1.99684	6.04117	8.64211	3.33292	5.11882	3.87036	8.11867	4.11398	6.4989	-0.609947	3.65876	5.1821e-15	2.90198e-14
Pole3	20.175	15.2907	14.6905	47.1631	54.9856	23.4658	11.9236	40.1926	59.1928	0.588737	4.29497	5.18223e-15	2.90198e-14
Ramp1	8.8715	3.03826	7.41612	1.03224	1.83555	1.71693	8.31838	1.42655	1.94557	-0.858542	3.43702	5.41746e-15	3.02772e-14
Cxx1a	5.02745	9.8374	8.70128	2.33264	4.17636	6.38928	9.70346	3.58381	6.57845	-0.651787	3.10957	1.32865e-14	7.22594e-14
Dynlt3	6.44225	4.36505	3.30051	3.20656	5.49906	6.48008	3.17167	3.14926	4.70691	0.586888	3.33704	3.15326e-14	1.66482e-13
Gbp11	8.72353	3.03388	2.81723	33.3765	10.8353	4.63861	3.05222	28.3976	9.10446	0.60658	4.98946	4.27647e-14	2.23561e-13
Mphosph6	17.8144	8.01735	6.24907	23.136	34.52	12.2336	6.11705	18.965	32.2583	0.58842	4.26302	7.53176e-14	3.86834e-13
Metrn	3.77557	5.87063	6.05023	2.01717	8.0685	3.40391	7.96411	2.20277	13.709	-0.785073	3.12127	7.70092e-14	3.94806e-13
Slc27a1	1.92962	3.81594	7.36528	2.15284	1.58678	2.41589	4.20348	2.56537	2.12823	-0.67495	3.18537	1.32091e-13	6.66736e-13
Odf2l	4.64049	2.93134	3.25934	1.97429	3.81152	4.36751	2.64453	1.95668	3.38791	0.617132	3.11479	1.14917e-12	5.38156e-12
Gal3st3	1.43659	1.82043	23.291	2.03535	0.877953	3.03103	3.06731	1.98958	0.695983	0.773218	3.28433	1.96615e-12	9.07742e-12
Ttc26	0.285059	1.0646	20.3477	0.698612	0.53732	0.520749	1.81422	0.73437	0.504642	-0.97897	3.50535	6.98281e-12	3.09922e-11
Ggct	15.2373	5.22303	5.58436	4.23981	12.3307	7.89539	6.33984	3.45466	12.3052	0.593527	3.51777	7.084e-12	3.14085e-11
Akr7a5	4.34945	5.29444	7.42222	1.74606	6.72915	3.3107	9.5474	2.25293	9.33223	-0.685975	3.3055	7.45044e-12	3.29643e-11
Gp49a	1.18878	1.53931	0.872462	84.006	11.7398	3.05431	0.465125	32.7263	6.95732	1.00455	4.35964	1.51451e-11	6.55078e-11
Zfp808	5.05854	1.09158	1.15215	0.351269	4.7535	1.88563	0.892799	0.383157	3.31951	0.82915	2.74752	2.05802e-11	8.84316e-11
Atf3	0.219242	0.922489	0.514846	311.312	22.014	1.8486	0.116727	175.736	19.122	1.08531	6.86225	2.6785e-11	1.14055e-10
B9d2	4.96505	9.30022	7.86966	9.76167	8.65411	5.95772	8.29505	10.3709	11.1054	-0.596708	3.1971	4.65698e-11	1.93737e-10
Il3ra	2.88832	4.09165	3.47595	4.66353	2.29263	2.30642	3.12329	5.50689	4.41303	-0.784491	2.43598	9.08694e-11	3.67413e-10
Pgp	4.52257	8.6192	7.52759	4.29798	9.37758	5.63774	11.8091	5.04311	16.9743	-0.632708	3.19808	1.53388e-10	6.06343e-10
Amica1	22.178	2.23759	3.7242	21.7652	11.8752	3.42214	5.9557	14.7885	10.5989	0.637508	4.76073	1.90581e-10	7.47454e-10
Rgs1	8.39504	4.54389	1.75963	45.5125	156.708	6.67452	1.57682	28.2814	131.217	0.635871	5.83252	2.03274e-10	7.94302e-10
Arl10	1.41872	7.53998	3.96669	1.5301	1.26518	4.79739	5.45813	2.39988	1.52337	-0.661736	1.96869	2.51121e-10	9.74988e-10
Socs2	0.272176	0.165081	0.464441	0.438284	4.22395	0.568181	0.226046	0.220471	5.7495	1.90813	1.77862	2.80476e-10	1.08351e-09
Zfp54	4.57436	2.2918	1.02685	1.06131	3.62866	3.49657	1.191	1.28263	2.66543	0.594688	2.64819	3.10159e-10	1.19222e-09
Phactr2	0.35444	0.208717	0.238217	0.51928	7.00563	0.410361	0.0816753	0.629456	5.82543	0.997081	3.90773	5.79212e-10	2.16092e-09
Zfp273	4.29052	2.10701	1.89404	0.979618	1.64805	3.22845	1.95967	0.640655	1.37855	0.63761	2.29196	1.15429e-09	4.19944e-09
Hyal2	1.81558	2.22549	1.70826	6.19467	6.8369	1.20928	2.26659	5.8927	9.95948	-0.819323	3.04089	7.03905e-09	2.37194e-08
Lyrm5	5.8307	2.90177	3.94709	4.44037	5.86138	4.40848	3.16426	3.90642	4.79259	0.605223	2.88399	7.43325e-09	2.49193e-08
Unc93b1	2.91863	2.57792	3.0186	1.23829	4.78788	1.60017	3.61106	1.85028	5.89617	-0.698661	2.91392	9.63405e-09	3.19568e-08
Ppargc1b	3.03841	1.78277	4.28106	0.892386	2.69763	1.13258	4.51198	1.20637	3.28828	-0.635028	3.30134	1.25655e-08	4.13254e-08
Tmem191c	3.11841	4.24347	8.36382	1.93136	0.679514	2.65222	9.78347	2.11986	0.844001	-0.652461	2.51674	2.22675e-08	7.149e-08
Acot7	4.77384	3.51732	5.5203	5.49478	64.9327	2.16201	3.87384	6.48332	80.6549	-0.714062	4.91657	2.78972e-08	8.85932e-08
Tnf	3.56872	2.34123	1.02904	501.822	72.8253	3.5562	0.627449	523.624	76.5234	0.646296	7.76375	6.35199e-08	1.93711e-07
Lif	0.141368	0.0790731	0.274122	59.4971	12.4539	0.258016	0.0761892	12.5157	9.88487	1.70989	5.42809	7.79826e-08	2.35333e-07
Ccl3	3.76198	1.76694	1.62765	1374.53	647.363	3.49239	0.781737	1356.37	626.063	0.975699	8.45161	9.1929e-08	2.74688e-07
Ccl4	3.46938	2.80886	2.58729	1788.61	621.517	4.98812	1.01648	2009.34	640.119	0.876788	8.53102	1.56676e-07	4.56434e-07
Mfsd2a	0.159026	0.0415875	0.0189323	16.8347	6.61445	0.275229	0.0271102	12.822	7.15809	2.74985	3.39717	2.57656e-07	7.37213e-07
Ercc6l	1.16339	0.847897	1.21393	1.40983	6.81792	1.29505	1.15159	1.45389	7.02287	0.613431	3.45782	3.55112e-07	1.00188e-06
Lilrb4	1.00176	1.54822	0.626689	92.0494	13.8548	2.61338	0.617448	38.5559	9.49905	0.756223	4.65203	4.11478e-07	1.15325e-06
Ccbl1	4.43716	2.83351	5.35816	1.25881	5.05301	1.83744	5.85283	1.62583	6.22249	-0.60954	2.98891	5.39815e-07	1.50401e-06
Alkbh7	4.77446	6.28455	7.1796	3.06686	7.81156	4.21824	7.46524	3.19795	11.9462	-0.596345	2.65337	6.29908e-07	1.74643e-06
Zfp771	1.63959	2.69345	3.48886	2.14986	3.66009	1.51596	4.12622	2.68892	7.35672	-0.752985	2.14445	8.53722e-07	2.34098e-06
Hist2h2aa1	3.67922	7.61669	7.76779	4.95198	1.29759	4.88421	8.31434	4.86885	1.58878	-0.680701	1.62956	1.47093e-06	3.90119e-06
Rasal1	3.66631	1.72475	1.21558	1.61497	3.31332	1.174	1.45633	2.03892	4.73458	-0.596043	3.0093	1.7112e-06	4.5089e-06
Spry1	0.256098	0.520082	0.344161	209.503	55.5674	0.94966	0.168573	217.764	64.0876	0.921777	7.24051	1.88637e-06	4.94895e-06
Slamf7	2.03181	0.442189	0.671497	153.622	15.9424	0.770668	0.268835	154.564	13.7791	0.749685	7.23934	3.20365e-06	8.19236e-06
Lrdd	1.72242	1.61262	2.66826	1.25672	5.61496	1.03077	1.80718	1.26017	8.17436	-0.587434	3.09503	3.32346e-06	8.47832e-06
Ccne2	0.610473	0.6284	0.522669	0.430213	5.0605	1.05261	0.59507	0.249499	5.10609	0.716384	2.42787	4.20866e-06	1.06185e-05
Cenpk	0.460888	0.207907	1.06035	0.417829	5.02151	0.603369	0.263432	0.307249	4.13269	1.46464	1.3405	4.58297e-06	1.15082e-05
H2-Eb1	8.98661	2.5912	5.02244	3.20368	0.760813	1.7925	2.6951	3.92645	0.769809	-0.671791	2.54856	4.58679e-06	1.15144e-05
Tyrobp	11.1966	4.5795	5.83043	5.33338	0.584424	2.57665	4.42789	4.74301	0.49511	-0.833165	1.34068	8.0852e-06	1.97594e-05
Recql4	0.607612	0.383682	1.22155	0.339164	6.23166	0.17767	0.765542	0.486134	8.35974	-1.18229	3.10254	9.09645e-06	2.20658e-05
Gdf3	0.698704	1.29892	26.483	0.794432	0.38871	0.759088	2.20225	1.02785	0.338085	-0.756705	2.79344	1.8823e-05	4.39927e-05
Trib1	0.959177	0.569526	0.349416	39.8622	7.14032	0.882268	0.661358	31.9337	7.11297	0.648371	5.32297	2.35018e-05	5.41051e-05
Syce2	1.01338	1.22217	1.5301	3.5091	9.8139	2.08206	1.70581	2.686	11.2036	0.747544	2.35864	2.54747e-05	5.84411e-05
Lad1	0.665346	0.733986	0.0324028	4.25617	21.9465	0.401287	0.0568985	4.9488	30.9723	-0.77643	4.4396	3.76399e-05	8.48821e-05
Obox3	0.139434	0.919792	19.0128	0.191167	0.192575	0.437701	2.09654	0.361503	0.113911	-0.992334	1.72681	4.62761e-05	0.000103261
Fosb	7.28344	0.364685	0.0451539	8.05404	1.57993	0.595015	0.0933026	9.60229	1.62164	0.783985	3.61685	8.8195e-05	0.000190446
Tnfsf14	2.43863	0.520016	0.56838	244.238	33.7846	0.937149	0.480136	279.275	31.9845	0.911535	6.94528	9.11657e-05	0.000196163
Ccna2	1.44071	0.590679	0.269794	0.647737	11.5667	0.973034	0.257568	0.709807	12.7252	0.638912	3.26924	0.000105448	0.000225222
H2-Ab1	10.3158	3.18215	5.41324	3.78434	1.22941	2.32415	3.41686	3.93909	1.37824	-0.585074	2.29714	0.000152126	0.000318146
Ifi30	9.07679	3.24696	5.02788	2.07072	8.0567	2.13162	5.42393	2.10762	10.8759	-0.600115	2.4868	0.000175645	0.000364016
Gzmb	3.46936	1.53608	0.171976	14.4641	411.846	0.904856	0.212778	4.37998	313.835	-0.726975	6.86935	0.000179108	0.000370379
Magohb	8.72591	2.72372	3.23581	37.557	40.0359	4.05718	2.89579	35.8503	36.4624	0.587925	3.89208	0.000270794	0.000546801
Chchd10	2.16455	2.74215	2.88213	3.22832	26.1549	1.82298	3.56966	4.75086	38.9048	-0.628457	3.27086	0.000493487	0.000960406
Cdkn1a	0.533574	0.479383	0.312392	92.7748	48.9746	0.818487	0.218479	112.639	54.066	0.817654	6.05869	0.000552929	0.00107045
Rgs16	0.611734	0.712887	0.754032	294.231	214.957	1.06419	0.350536	356.106	204.375	0.651283	8.11154	0.000657344	0.00126195
Tspan4	0.570882	0.157554	0.367642	0.970053	7.73264	0.428774	0.569466	0.740313	7.83972	1.34354	1.82665	0.000698866	0.00133743
Spc25	0.830258	0.321489	0.307947	0.240897	5.01356	0.631719	0.22931	0.228155	5.57633	1.01055	1.42188	0.00102013	0.00190755
Hspa1a	27.6101	0.0727674	0.0667872	0.220675	0.15895	0.192276	0.0249566	0.201173	0.308282	1.40908	3.12461	0.00142391	0.00260523
Ckb	1.15299	0.304244	1.22059	0.263698	3.23928	0.105625	1.35276	0.562649	5.36587	-1.72478	1.35848	0.00248986	0.00438279
Srxn1	0.205934	0.0935303	0.0660192	10.4268	2.42771	0.197964	0.0725221	17.9298	3.11255	1.21979	3.43161	0.00462545	0.00781488
Cenpn	0.772482	0.722333	0.923492	0.610562	4.19384	0.444813	0.588536	0.927662	5.4984	-0.712937	1.6794	0.00709141	0.0116162
Nt5dc2	1.26287	0.90728	1.61023	0.919518	8.37046	0.557902	1.50858	1.2161	11.5856	-0.689593	2.25422	0.00709141	0.0116162
Tnfsf4	0.030322	0.0442714	0.0195838	0.0695477	5.70694	0.16573	0.0254495	0.0551185	6.065	1.9608	1.35505	0.0072307	0.0118352
Vcam1	8.60564	0.0912541	0.0363303	0.168553	0.0136082	0.193398	0.00147423	0.202996	0.00945952	0.996406	1.67964	0.00724975	0.0118641
Slc7a3	0.295838	0.330509	1.03765	18.6124	25.4826	0.513361	0.939919	18.1182	25.1497	0.695613	4.59048	0.0083336	0.0135129
Ly6k	2.55975	1.06427	1.41473	3.6439	4.05286	1.62364	0.939532	3.25433	4.24714	0.641309	1.05156	0.0121963	0.019237
Lipg	0.0249394	0.0133236	0.268299	13.8191	1.54461	0.0572695	0.0249589	10.6373	1.32887	2.27548	3.52249	0.0127674	0.0200478
Tmem238	0.69005	0.568318	0.377838	1.11644	4.69662	0.291423	0.559021	1.33161	5.4103	-0.913113	1.02471	0.0188784	0.0288024
Asns	0.108603	0.510349	0.268384	18.8506	57.2227	0.299963	0.0982438	18.102	58.0006	-0.611189	5.04703	0.019197	0.0292466
Crabp2	0.404171	0.396469	0.0566437	2.5756	19.3176	0.168068	0.220535	2.95052	23.9692	-1.33779	2.44999	0.0289793	0.0427543
Car12	1.80392	0.0908943	0.0771743	5.43267	7.79482	0.164338	0.211524	5.62585	7.53917	0.768859	3.60205	0.0330831	0.0482391

## Sheet: naïve TSLP 24h
rownames.diffexp.	media.0h	media.4h	media.24h	TCR.TSLP.4h	TCR.TSLP.24h	media.TSLP.4h	media.TSLP.24h	TCR.media.4h	TCR.media.24h	logFC	logCPM	PValue	FDR
Zfp457	7.23329	6.49409	153.403	4.81467	2.69508	8.11729	14.7639	6.92298	1.95031	-3.17565	5.69497	0	0
Trim36	1.12749	2.37702	40.3612	1.47028	0.705182	1.64875	3.72406	1.66417	0.572118	-3.05974	4.79469	0	0
Nmrk2	0.364189	1.20318	27.9537	0.484712	0.239964	0.781931	2.25721	0.795697	0.257047	-3.02726	2.57916	0	0
Gdf3	0.698704	1.29892	26.483	0.794432	0.38871	0.759088	2.20225	1.02785	0.338085	-3.01088	2.79344	0	0
Grk1	1.40915	2.9894	48.253	1.6184	0.907602	2.52321	5.47778	2.1559	0.724398	-2.94487	5.87096	0	0
Ttc26	0.285059	1.0646	20.3477	0.698612	0.53732	0.520749	1.81422	0.73437	0.504642	-2.94389	3.50535	0	0
Omd	0.903349	1.83688	35.7891	1.93089	0.853425	1.52059	2.89723	2.57484	0.575037	-2.9426	3.08466	0	0
Ufl1	13.7384	10.7074	91.6509	34.4903	6.97685	62.1805	12.0853	40.3117	6.86928	-2.93246	7.16522	0	0
Veph1	1.58026	2.34521	44.6131	1.50049	0.93081	2.88847	5.05602	1.80723	0.727039	-2.90649	5.5429	0	0
Zfp300	1.4976	4.04818	63.4596	1.33092	0.778301	1.79693	7.11004	1.56967	0.823112	-2.89518	5.49787	0	0
Nanog	0.716317	1.61061	30.3432	1.1869	0.680893	1.55129	2.58164	1.62736	0.556927	-2.88644	2.36277	0	0
Lars2	159.703	223.952	1402.03	405.823	447.728	465.75	203.658	876.84	163.614	-2.84908	10.9656	0	0
Kdelc2	0.769148	1.37198	23.0381	0.773408	2.59563	1.40657	2.14711	1.37483	2.33831	-2.84795	3.8123	0	0
Usp17la	1.81133	1.88973	35.3333	1.05636	0.60708	8.96221	3.4434	1.65898	0.542974	-2.8084	4.00365	0	0
Il2ra	3.31369	4.51288	43.565	279.604	176.776	7.59514	5.04842	225.645	175.449	-2.79731	8.82572	0	0
Kif15	0.862559	0.840478	11.2908	6.4502	4.88587	0.643536	1.11064	7.43167	4.88533	-2.70851	4.36868	0	0
Ap1s3	11.0302	8.63087	86.915	14.1937	12.8754	11.7337	12.7333	15.0495	11.2577	-2.52598	5.96352	0	0
Slc18b1	0.746848	1.68229	23.3179	0.785089	0.520442	1.23779	2.71251	1.10258	0.379909	-2.51679	3.22727	0	0
Nsl1	1.40443	1.95292	21.8617	1.43994	5.10946	1.66125	2.64427	1.51036	5.61987	-2.50216	3.82151	0	0
Smco1	1.97042	3.4481	49.2824	3.20484	1.38325	3.44706	6.01406	4.06092	1.04602	-2.48265	3.28814	0	0
Ccl9	0.826902	1.4047	16.4261	1.95555	32.7157	1.46518	1.94324	1.88572	34.2749	-2.40358	4.98054	0	0
Gal3st3	1.43659	1.82043	23.291	2.03535	0.877953	3.03103	3.06731	1.98958	0.695983	-2.36101	3.28433	0	0
Gjc3	0.834566	1.51049	19.0778	1.01803	0.597496	1.28893	2.58525	1.0811	0.533424	-2.33849	3.3959	0	0
Cd300a	1.84339	2.06305	18.7419	1.75184	0.8237	2.3677	2.59272	1.67865	0.672526	-2.30759	4.05879	0	0
Mmachc	5.40106	4.42654	34.2504	5.64414	14.4119	4.00031	5.02622	6.54981	15.7078	-2.27444	4.38128	0	0
Bard1	1.44928	1.97946	18.6365	0.923112	4.3567	1.80295	2.854	1.37911	4.73184	-2.25802	4.5597	0	0
Tnfrsf10b	4.87697	7.90689	54.7857	11.4616	11.7967	7.11669	9.32866	12.4296	11.9698	-2.21875	5.60525	0	0
Zfp488	10.8904	15.0959	91.6548	10.002	5.74027	15.6354	18.9203	13.1298	4.47901	-2.1196	6.58021	0	0
Neu3	2.47826	2.71044	18.8821	1.57888	4.05437	2.82703	3.17927	1.78329	4.24655	-2.01972	3.96122	0	0
Bcl2	32.235	5.08755	8.3815	36.0171	29.7086	32.5276	35.2649	18.5245	23.0443	1.93817	7.52437	0	0
Uevld	3.649	6.03914	26.8762	2.4978	2.49785	7.13496	6.13644	2.62458	2.26884	-1.80904	5.00809	0	0
Supt7l	7.31461	7.84583	42.4579	6.6302	8.47702	7.40957	9.88355	6.3787	8.49761	-1.75007	5.0256	0	0
Mplkip	10.5086	9.08119	42.1399	8.38499	6.41565	10.1463	10.1229	9.22774	6.02351	-1.69416	5.12082	0	0
Mrpl35	5.48776	4.79626	21.5112	11.4586	15.318	5.45382	4.93959	10.6589	13.9694	-1.68924	5.30879	0	0
Mbd4	4.32227	6.33208	23.1347	3.24163	5.23949	6.24646	5.72712	3.0727	4.61213	-1.65738	4.68395	0	0
Ube3a	19.6387	13.6713	47.0015	26.7644	24.0342	35.8642	15.813	27.7735	20.2976	-1.54489	7.10495	0	0
Cpox	6.68966	7.39615	30.9229	4.5691	11.7017	6.31093	8.80031	4.85706	11.7956	-1.44226	5.1021	0	0
Zmat3	3.92492	4.6225	17.7036	2.06371	12.7833	5.45832	5.45668	2.68648	12.6508	-1.39147	5.92819	0	0
Reep3	9.11496	10.0611	33.6375	11.7288	13.0691	10.1127	11.002	11.5707	12.6699	-1.35758	6.31891	0	0
St3gal1	39.3979	20.6754	82.2238	77.1992	26.7647	19.9236	38.0381	72.9166	25.691	-1.05911	8.08578	0	0
Glrx2	8.00408	7.64532	30.2532	6.20147	8.05935	10.6456	10.2601	6.75753	7.85287	-1.28165	5.33317	7e-292	1.45e-289
Tmem206	2.94259	3.88826	17.254	2.54853	4.87987	4.94097	4.56451	2.90347	5.12006	-1.49953	4.56774	2.52e-286	5.09e-284
Cd274	18.5206	10.087	27.5305	455.225	55.5239	12.5664	8.89502	445.252	46.0064	-1.27761	8.77871	7.62e-278	1.51e-275
Gje1	0.654496	1.62323	25.4015	1.3725	0.584092	1.43581	3.12036	1.51165	0.527823	-2.42455	2.37209	8.8e-278	1.7e-275
Ldlrad2	0.63565	0.826696	16.1735	0.659644	0.332699	0.870845	1.70191	0.665157	0.234772	-2.68821	1.89348	9.12e-250	1.72e-247
Sumf2	8.64183	9.44034	36.4016	6.04349	9.50233	8.53289	11.3862	6.98105	10.7387	-1.30813	4.75224	3.13e-245	5.78e-243
Obox3	0.139434	0.919792	19.0128	0.191167	0.192575	0.437701	2.09654	0.361503	0.113911	-2.57533	1.72681	8.92e-239	1.61e-236
D17H6S53E	6.5112	10.1397	35.7939	8.35418	6.60776	10.8758	11.7734	8.95137	6.26431	-1.2484	4.69837	8.36e-223	1.48e-220
Zfp113	6.29248	6.16837	16.2188	4.18023	3.69069	7.5173	6.46616	4.47446	3.10826	-1.07281	5.46603	8.52e-213	1.48e-210
Zfp953	4.86732	3.86894	9.41421	2.18929	3.14387	5.61811	3.11061	2.41328	2.39631	-1.30866	4.31332	7.19e-159	1.22e-156
Sh3bp1	59.4509	32.4391	36.785	24.4421	37.4637	58.959	73.4853	17.3597	46.7513	0.872696	6.43356	1.73e-151	2.88e-149
Slc35e2	9.89871	11.5913	21.2776	8.92652	11.4145	13.7955	11.0187	9.70509	9.66842	-0.814142	6.30731	8.78e-151	1.43e-148
Pycr1	0.12876	0.442064	5.44951	5.38719	5.10057	0.41984	0.472058	5.28062	5.84334	-2.81522	3.20211	2.12e-147	3.39e-145
2020-03-05	12.3175	9.45477	22.6335	17.8277	18.603	11.4434	10.3362	17.2315	17.1872	-0.876062	6.02546	6.32e-143	9.94e-141
Timmdc1	9.48465	7.12413	24.7304	14.3177	14.8827	8.45409	8.91062	13.8851	15.3706	-1.12036	4.80388	1.46e-141	2.25e-139
Ulk3	16.7681	24.8095	51.4658	12.3025	6.98618	24.6499	26.6201	13.1277	7.41999	-0.747553	5.94927	9.42e-141	1.43e-138
Tstd2	9.9098	14.6715	25.7988	16.1225	14.8545	14.7201	12.5111	15.5074	14.3307	-0.854486	5.90884	2.59e-137	3.85e-135
Birc5	0.8992	0.810973	5.98875	0.372696	4.87039	0.776569	0.954235	0.720619	5.77309	-2.0589	3.02462	1.52e-132	2.23e-130
Cwc25	10.8787	11.3541	26.585	16.1885	9.9515	13.014	12.3122	15.3111	10.2012	-0.84628	5.59752	1.02e-130	1.47e-128
AI597468	4.42237	5.02156	12.1032	3.57121	7.40826	6.78884	4.48893	3.71982	6.615	-1.06339	4.5645	3.31e-121	4.68e-119
Hbb-b1	3.5295	0.4644	12.6317	10.0332	0.029155	5.8562	0.188662	9.01382	0.0817306	-5.71412	1.37069	2.34e-120	3.2e-118
Hbb-bs	3.48531	0.458586	12.4735	9.90756	0.02879	5.78288	0.1863	8.90097	0.0807073	-5.71412	1.37069	2.34e-120	3.2e-118
Gmeb1	7.9553	7.83207	17.4609	13.5137	6.19984	8.63009	9.10051	13.5911	6.3514	-0.732808	6.11916	4.16e-120	5.6e-118
Pik3r5	51.7093	56.3298	52.6198	40.4106	15.1365	76.7621	85.7001	39.9746	15.5061	0.611445	7.81059	1.23e-117	1.63e-115
Plin3	10.4616	13.2898	38.879	5.46903	9.52289	12.5404	18.9471	5.49393	10.82	-0.81081	4.99188	2.63e-116	3.44e-114
Abi2	2.51302	2.11924	7.18186	3.14347	7.97231	2.48891	3.18595	3.28999	7.28642	-1.09968	4.73149	2.15e-115	2.77e-113
Polr1b	12.587	6.50342	21.4975	79.8838	53.1301	6.40458	10.0805	81.1418	53.2086	-0.778794	7.18922	6.6e-115	8.37e-113
Zfp882	3.14823	2.6459	8.1314	1.50152	2.49152	3.00312	3.35891	1.49082	2.08107	-1.01139	4.1888	7.83e-110	9.78e-108
Trmt10a	3.44167	1.94049	7.7598	6.11377	4.19089	2.23115	2.42009	6.19853	4.31379	-1.25715	4.1045	2.18e-105	2.69e-103
Osbpl8	19.761	24.3016	29.1975	27.8559	29.428	32.252	18.5394	21.6198	23.1816	-0.598311	7.55766	2.21e-105	2.69e-103
Ahnak	24.2168	24.1025	10.8723	12.4068	12.4026	26.7386	7.49188	13.9379	9.82167	-0.660898	8.23649	3.04e-104	3.63e-102
Prdm9	6.01025	4.03832	11.7501	2.26043	1.79034	5.12121	5.02025	2.36244	1.75335	-1.05197	4.00793	3.34e-104	3.94e-102
Zfp26	6.68498	6.26159	10.0735	5.71748	5.19126	8.29954	5.75249	5.41849	4.41189	-0.686158	6.27382	3.12e-103	3.63e-101
Socs3	27.9263	28.023	22.4031	27.459	7.14269	30.6877	41.7939	28.8366	7.77698	0.701583	6.1556	3.1e-102	3.56e-100
Cd74	38.1155	10.4938	19.067	13.7704	11.7081	8.80919	11.265	15.0174	13.2019	-1.40128	4.551	2.01e-101	2.28e-99
Hba-a1	7.19801	0.855231	11.7991	11.3684	0.134442	7.79463	0.685434	9.75085	0.122222	-3.87073	1.46165	6.53e-101	7.2e-99
Hba-a2	7.14687	0.849155	11.7153	11.2876	0.133487	7.73925	0.680564	9.68158	0.121354	-3.87073	1.46165	6.53e-101	7.2e-99
Igfbp4	45.0541	3.58601	2.55375	3.7986	14.732	8.81118	9.57363	2.14641	17.1179	1.72636	4.68809	1.46e-98	1.57e-96
Ppm1k	10.4608	7.49126	16.6147	5.932	6.55816	9.6469	8.72549	5.97627	5.51091	-0.68918	5.65039	1.64e-98	1.74e-96
Sco1	3.86128	3.33821	8.31174	8.57385	5.93239	3.2181	3.01564	7.89797	5.551	-1.08022	4.60304	2.77e-95	2.9e-93
Sgk3	6.91857	5.41631	12.3527	2.25652	2.99937	6.06552	6.42728	2.45229	2.52204	-0.764039	4.94469	2.21e-91	2.29e-89
Mkl2	4.94626	6.64194	10.1649	3.38019	4.40127	5.87229	5.52324	3.64564	4.39903	-0.68497	5.57626	1.13e-88	1.16e-86
Dqx1	3.04881	4.46168	17.7177	5.33495	3.52485	4.10691	8.29816	5.17184	3.13161	-0.785008	4.3241	7.04e-88	7.12e-86
Itgb3	12.5357	4.37945	6.89871	2.86338	2.11339	8.66046	12.5334	2.21198	1.78198	0.882966	5.21299	1.58e-87	1.58e-85
Tspan31	12.9371	14.9954	21.5449	8.70734	33.8835	12.8418	9.04516	9.13015	36.4086	-1.01913	4.82801	4.66e-86	4.6e-84
Rfxank	8.79931	11.0986	20.0305	6.15448	5.12922	9.90424	10.9179	6.37339	5.30556	-0.702122	5.18192	6.41e-84	6.26e-82
Rad1	11.4569	13.4025	34.3663	11.2874	21.3525	13.6573	15.8571	10.6661	21.1408	-0.785758	4.73548	2.28e-83	2.2e-81
Trub1	7.65136	4.37467	13.0649	5.10692	8.90207	4.50558	6.50343	5.20327	8.91186	-0.769181	4.99871	6.51e-82	6.22e-80
Ppp1r16b	15.426	16.6615	16.1063	128.266	23.0373	15.1049	9.82931	130.193	22.1123	-0.615151	8.08751	7.63e-80	7.2e-78
Sfxn2	7.41924	3.75623	16.0387	2.5381	6.83818	3.98693	7.59778	2.4266	6.38075	-0.742462	4.4064	3.13e-77	2.92e-75
Pim2	49.933	36.0001	21.1479	105.263	269.878	43.776	37.4654	91.4875	316.064	0.722	7.79193	7.28e-74	6.65e-72
Carf	2.55731	4.56792	10.2827	1.8551	1.19137	5.08818	5.39319	1.89423	0.941636	-0.6983	4.49577	4.13e-73	3.65e-71
Bloc1s3	4.99412	8.07877	23.1581	4.92457	6.11238	8.74768	10.5218	6.14047	6.04035	-0.792154	4.06082	1.92e-71	1.68e-69
Bpnt1	7.03036	7.13553	18.4839	3.51918	9.57837	6.69014	8.5766	3.63306	8.69862	-0.785447	4.21487	2.25e-69	1.92e-67
Zbtb8a	5.14147	6.16068	14.4135	2.28248	3.29078	5.87696	6.49821	2.53312	3.78973	-0.84551	3.68793	5.08e-64	4.19e-62
Mzt1	15.6645	14.496	25.4272	24.0397	14.0256	18.1771	14.5221	22.4921	11.5273	-0.656237	5.39271	2.52e-63	2.06e-61
Slc8b1	3.08126	6.33405	14.4311	1.68687	1.72528	4.81005	6.9569	2.29438	1.73183	-0.708984	3.84613	3.65e-60	2.89e-58
Zfp799	5.15196	4.42075	9.47379	3.40812	2.43843	4.74822	4.96482	3.21746	2.1742	-0.70964	4.30307	2.64e-56	2.04e-54
Zbtb6	8.40917	5.68269	9.50621	7.41419	7.54461	8.57237	5.35428	6.57415	5.63044	-0.679539	5.09159	1.56e-54	1.2e-52
Olfr613	4.3715	3.88344	6.62847	3.74969	2.08207	5.89303	3.43568	4.36788	1.53157	-0.732782	4.42314	2.96e-50	2.19e-48
Arsb	6.51845	7.9035	15.3566	3.48635	1.8123	81.896	10.2486	4.23235	1.956	-0.585068	5.99173	5.34e-49	3.82e-47
Tfrc	18.6381	8.3287	7.03785	144.981	154.258	14.2873	11.7916	128.393	128.651	0.633894	8.39502	5.47e-49	3.87e-47
Tmem69	9.45341	7.77132	15.8961	10.7845	16.2751	10.5214	8.6121	10.3078	13.7714	-0.648956	4.84676	1.61e-47	1.13e-45
Alcam	0.231425	0.231276	1.10626	9.79512	14.6844	0.280679	0.167843	11.1633	13.718	-2.36292	4.83394	3.57e-47	2.48e-45
Med18	4.97162	6.05771	14.4292	5.22205	8.30535	6.91204	6.35293	5.48275	8.62932	-0.810055	3.67677	3.41e-46	2.31e-44
Slc25a42	3.88523	3.9727	13.7984	3.1274	3.34854	3.7171	7.86873	3.19728	3.84955	-0.595075	4.10669	1.92e-45	1.29e-43
Ppih	7.86594	6.25734	10.2565	9.68913	17.6349	6.78915	4.75505	8.39661	16.7415	-0.833481	4.47766	1.04e-44	6.92e-43
H2-Eb1	8.98661	2.5912	5.02244	3.20368	0.760813	1.7925	2.6951	3.92645	0.769809	-1.61268	2.54856	6.51e-44	4.26e-42
Gdpgp1	3.03818	4.3924	8.28441	3.82257	3.43894	3.46455	4.02004	3.61467	3.61102	-0.68177	3.93581	6.52e-44	4.26e-42
Ube2v2	7.41663	3.60847	5.56889	11.8611	16.0541	5.67686	3.31629	10.8134	12.7998	-0.671918	5.69573	3.4e-42	2.2e-40
H2-Aa	20.3096	4.80575	9.09381	7.33459	2.0107	4.18617	5.29573	6.03262	2.07664	-1.46785	2.92417	5.31e-41	3.42e-39
Tex9	7.37386	1.46615	5.43699	0.562617	1.89573	1.51653	2.78598	0.791717	1.8403	-0.713774	3.53574	7.59e-37	4.6e-35
Xrcc2	1.44745	1.62973	4.46489	1.25277	5.36867	1.42895	1.81135	1.19837	5.36236	-0.954864	3.15579	1.4e-36	8.46e-35
Gtpbp3	4.02085	7.07025	10.8921	2.54503	5.17869	5.15848	6.30458	2.75845	6.62504	-0.618264	4.05212	4.19e-35	2.44e-33
Plek	4.87555	1.75125	2.21537	13.3608	39.8797	1.98141	0.843269	16.5422	35.5151	-1.24018	5.75065	2.08e-34	1.19e-32
Kcnip2	0.275764	10.4499	9.94131	2.68804	0.322082	9.76464	6.16456	3.65783	0.261429	-0.701454	3.64115	3.22e-33	1.74e-31
Tnfrsf21	0.61271	0.224843	1.55258	5.3466	4.67926	0.145569	0.25582	5.24338	5.15818	-1.79788	3.2414	5.41e-33	2.89e-31
Dnase2a	2.4465	3.87378	8.53673	2.38563	4.01981	2.70452	3.94448	2.35508	4.72069	-0.790612	2.72506	2.58e-27	1.18e-25
Cxcr2	7.48203	3.76333	6.63179	8.0853	4.14375	6.45953	3.73038	7.5761	3.05071	-0.593907	4.15469	1.85e-25	8.2e-24
St8sia6	0.247064	8.55605	8.62683	2.34107	0.0227784	7.66315	6.19252	2.12916	0.0282019	-0.58941	3.76822	5.21e-25	2.26e-23
Fasl	0.736269	0.864651	1.47345	8.60565	4.78095	0.705767	0.313957	9.13945	4.28539	-2.13652	2.75519	1.39e-24	5.92e-23
Xcl1	8.59038	4.45989	8.09878	4987.63	1636.13	13.2167	2.01066	6371.51	1533.42	-1.5511	9.66095	7.05e-24	2.93e-22
Cd79a	3.65094	3.01174	7.07544	2.37026	0.568841	2.24648	5.05119	1.88858	0.656867	-1.12438	2.11355	1.34e-23	5.5e-22
H2-Ab1	10.3158	3.18215	5.41324	3.78434	1.22941	2.32415	3.41686	3.93909	1.37824	-1.25777	2.29714	1.37e-21	5.15e-20
Tha1	6.95846	11.0963	8.30387	3.87784	1.65263	8.56343	12.8795	4.70048	1.90937	0.587217	3.72654	1.87e-20	6.77e-19
Smo	1.58248	2.3083	0.995599	0.694866	5.59496	1.94468	2.08373	0.809034	6.82304	0.817955	3.42736	3.41e-17	1e-15
Tigit	4.98214	2.63639	3.72146	3.25595	16.1356	7.50929	1.30077	3.62102	13.6936	-1.23924	2.6662	2.94e-15	7.5e-14
Irf8	3.13002	2.47123	1.27664	474.088	115.368	2.12784	0.743405	329.385	127.647	-1.27264	8.3674	3.71e-15	9.34e-14
Rpusd3	2.55847	5.95686	2.03795	2.19925	4.11137	4.05925	4.4488	2.30611	5.13642	1.02056	2.34945	4.83e-15	1.2e-13
Cxcr3	5.55202	3.86824	6.60509	24.4108	7.09298	2.5793	4.41953	35.6739	8.46454	-0.70161	4.16644	4.89e-15	1.21e-13
Bcat1	0.0552355	0.151779	0.316934	28.7917	29.5889	0.156903	0.074819	28.966	29.8367	-1.56861	6.6769	9.82e-15	2.38e-13
Tbx21	3.0094	1.16066	1.9033	167.466	33.5014	1.13057	0.877966	145.984	39.7835	-0.977993	6.80405	1.62e-14	3.85e-13
Klrk1	4.97462	2.66314	3.13213	2.69647	3.09491	2.84511	2.04241	2.37435	2.7752	-0.6449	3.33521	6.47e-14	1.43e-12
Tesc	6.99035	3.49425	0.539826	1.91467	4.88465	3.39481	2.30097	2.52749	5.07397	1.18349	1.8251	7.72e-14	1.68e-12
Plk2	1.2541	0.281391	0.852825	8.3973	16.7938	0.240681	0.160071	7.2613	18.569	-1.58273	4.09246	7.95e-14	1.72e-12
Gzma	28.0411	14.5899	11.1826	14.2605	0.749513	14.7287	7.45613	11.4741	0.647865	-0.636469	3.38961	3.33e-13	6.82e-12
Nr4a2	2.12722	2.26594	0.971763	915.793	46.7946	4.37471	0.329159	907.289	42.9707	-1.14051	9.40353	8.3e-13	1.62e-11
Pole2	9.45396	3.7412	3.52583	5.43228	17.9707	6.69248	5.6905	3.77973	17.6717	0.732764	3.8614	2.03e-12	3.75e-11
Ncs1	0.0699162	0.0938632	0.374725	5.41041	13.0111	0.0977448	0.0310534	6.95766	14.8744	-2.39036	4.22172	9.74e-12	1.66e-10
Fitm2	1.97392	1.72682	4.5872	6.72768	4.23498	1.35992	2.40251	6.29417	4.16468	-0.594228	2.63224	2.44e-11	3.99e-10
Phactr2	0.35444	0.208717	0.238217	0.51928	7.00563	0.410361	0.0816753	0.629456	5.82543	-1.43683	3.90773	3.25e-11	5.26e-10
Rasgef1b	0.597926	1.45765	1.1412	31.2206	8.15868	1.36253	0.435795	32.5354	8.46946	-1.02564	4.83255	4.92e-11	7.74e-10
Cd163l1	3.84358	4.77275	3.11057	1.81632	0.122116	3.57828	2.5895	2.05254	0.128513	-0.655447	3.17953	6.56e-11	1.01e-09
Cyb561d2	3.82515	4.91449	3.85561	3.94314	6.82679	3.70506	5.98389	4.69328	7.6497	0.601186	3.2642	7.99e-11	1.22e-09
Jmjd7	3.68487	5.24706	3.30293	2.62186	3.25393	5.29187	5.79799	2.23871	3.66812	0.624917	2.56276	8.67e-11	1.32e-09
Ldlr	4.54452	1.47308	0.498906	5.48303	10.3238	1.20785	1.08884	5.46726	11.2431	0.726542	4.41669	1.01e-10	1.52e-09
Mtx2	10.683	6.19903	3.1141	11.5628	39.4438	7.57844	5.72616	9.63424	38.2968	0.613519	4.25774	1.87e-10	2.68e-09
Ly6a	15.1431	6.55869	8.03355	218.929	124.314	8.06911	5.58819	191.414	91.9589	-0.621959	6.22406	4.99e-10	6.71e-09
Snx10	3.53542	1.75925	2.60909	1.68494	4.75458	1.91906	1.78111	1.34937	4.79972	-0.677655	2.8618	1.28e-09	1.63e-08
Slamf7	2.03181	0.442189	0.671497	153.622	15.9424	0.770668	0.268835	154.564	13.7791	-1.03992	7.23934	1.78e-09	2.23e-08
Kit	0.838803	2.34188	1.03939	7.53022	0.336293	1.89943	0.558748	6.42189	0.292324	-0.638526	3.6335	5.47e-09	6.27e-08
Litaf	1.22168	1.1329	1.0989	7.6045	16.6277	1.40778	0.511426	8.56675	18.7497	-1.0448	3.86411	7.86e-09	8.8e-08
Lipg	0.0249394	0.0133236	0.268299	13.8191	1.54461	0.0572695	0.0249589	10.6373	1.32887	-2.25775	3.52249	9.7e-09	1.07e-07
Ydjc	1.58028	1.19196	0.703593	4.09497	9.06215	1.11274	1.80315	4.66875	12.298	0.756048	2.52704	1.78e-08	1.9e-07
Rad51	0.807966	0.877995	0.184221	0.442317	21.5369	0.960282	0.648022	0.560022	24.4527	1.21462	3.65579	1.91e-08	2.02e-07
Fcer1g	8.93413	2.83939	3.96637	3.12498	0.752681	2.68235	1.99937	3.43028	0.684151	-1.01077	1.03583	2.04e-08	2.14e-07
Slc29a2	0.80202	0.531963	0.315411	3.47992	5.02098	0.419255	0.88244	3.69281	5.54916	0.696695	2.59177	5.1e-08	4.99e-07
Coro2a	4.31565	1.15862	1.63419	0.817695	8.03062	1.1882	1.25433	1.11561	9.77736	-0.618222	3.81208	6.82e-08	6.49e-07
Cenpk	0.460888	0.207907	1.06035	0.417829	5.02151	0.603369	0.263432	0.307249	4.13269	-1.25859	1.3405	9.08e-08	8.45e-07
Galk1	6.04692	3.11847	3.29424	16.8178	36.2017	2.93059	4.91419	16.5702	49.595	0.593708	4.57535	2.92e-07	2.49e-06
Insl6	6.95487	1.84335	1.07122	13.8568	5.92061	1.93965	2.68371	14.0248	5.36631	0.925842	2.01151	3e-07	2.55e-06
Serf1	1.26757	1.28732	2.86727	2.18619	8.26266	1.72817	1.09175	1.17256	8.73247	-1.10312	1.06404	3.34e-07	2.8e-06
Pard6a	2.29883	3.75751	1.41038	1.95843	4.23345	2.73488	2.65083	2.80946	5.40865	0.807525	2.09556	3.58e-07	2.98e-06
Nrn1	0.0928364	0.282784	0.699124	10.3676	57.2858	0.314286	0.178356	12.4709	74.3115	-1.53575	4.82945	5.98e-07	4.69e-06
Ccl4	3.46938	2.80886	2.58729	1788.61	621.517	4.98812	1.01648	2009.34	640.119	-1.02967	8.53102	8.2e-07	6.22e-06
Bhlhe40	1.36396	1.51759	0.626891	52.5837	28.5106	1.90702	0.367331	31.7348	29.5311	-1.03931	5.6787	1.07e-06	7.89e-06
Phlda1	1.7041	1.35394	0.140313	3.24045	4.73198	1.27291	0.496598	4.44324	6.24537	1.87325	2.43691	1.37e-06	9.83e-06
S100a6	5.69023	3.35714	5.50541	3.08354	1.63076	3.6689	3.09858	2.59367	1.97792	-0.60397	1.34469	1.69e-06	1.19e-05
Gadd45g	2.06664	0.574099	1.42176	20.2539	6.70545	0.516883	0.489513	11.5021	11.2868	-1.09685	2.73069	1.7e-06	1.19e-05
Frmd4b	2.82488	0.342185	0.646226	17.7567	0.426669	0.36304	0.386448	11.3238	0.357814	-0.74135	4.26018	1.86e-06	1.29e-05
Atf3	0.219242	0.922489	0.514846	311.312	22.014	1.8486	0.116727	175.736	19.122	-1.34744	6.86225	2.94e-06	1.93e-05
Nr4a3	5.17827	5.67282	1.54748	1068.53	68.4548	7.71757	0.924759	1131.56	73.8239	-0.778062	8.95087	3.83e-06	2.46e-05
Dusp4	1.21443	0.461787	0.101228	8.25222	11.485	1.17602	0.345527	13.3926	15.6858	1.71459	3.8459	3.91e-06	2.5e-05
Sema7a	0.512167	0.280367	0.442306	404.875	38.4199	1.02023	0.167961	420.708	40.086	-1.02791	8.36411	6.16e-06	3.75e-05
Bcl2l2	1.39691	1.162	1.29673	1.00868	4.86287	1.73706	0.994521	1.30667	4.80876	-0.596156	2.92889	8.81e-06	5.16e-05
Nme6	2.45056	2.76212	1.85556	2.90435	10.7456	3.16178	3.3443	3.62654	11.8265	0.628765	2.39963	9.52e-06	5.54e-05
Cth	0.0524406	0.0561351	0.422688	9.61445	55.6619	0.0531716	0.0491423	6.4902	48.283	-1.99608	4.61494	1.32e-05	7.42e-05
Bag2	1.49414	1.06523	0.490551	1.80331	8.09379	0.837377	0.977037	1.8148	8.84978	0.860755	2.47027	1.4e-05	7.82e-05
Nfil3	1.64305	1.79227	1.65494	5.88643	7.61668	2.12233	1.18652	6.23931	8.12747	-0.674488	3.06478	2.13e-05	0.00011294
Cd160	12.0148	0.557469	0.505145	132.239	29.4657	0.46979	0.280058	169.065	27.4554	-1.06586	6.74409	2.59e-05	0.00013563
Rbpms2	0.265087	0.189811	0.380257	13.6371	1.8553	0.321686	0.173963	12.7579	1.7451	-1.61399	2.75363	4.53e-05	0.00022105
Tmed1	1.48149	2.43133	0.499463	2.82487	4.70988	2.22208	1.07233	3.47016	5.49657	0.700431	2.1154	4.72e-05	0.00022881
Rgs16	0.611734	0.712887	0.754032	294.231	214.957	1.06419	0.350536	356.106	204.375	-0.75723	8.11154	5.8e-05	0.00027536
Hspa1b	41.9075	0.137065	0.189123	0.257515	0.371402	0.19882	0.0312877	0.292804	0.58067	-1.91775	3.79464	6.03e-05	0.00028463
Chst2	0.160567	0.367155	0.197944	16.6167	14.886	0.289558	0.0725905	20.3872	18.7833	-1.02955	5.63661	9.76e-05	0.00043992
Ramp3	1.24464	3.27658	0.847481	36.0231	0.875311	2.88219	0.386528	45.5912	1.07563	-1.08868	3.64271	0.00016276	0.00069237
Lag3	0.40274	0.286125	0.844037	0.791323	68.3218	0.308949	0.350876	0.777954	75.4865	-0.685013	5.05028	0.00017866	0.00074951
Lif	0.141368	0.0790731	0.274122	59.4971	12.4539	0.258016	0.0761892	12.5157	9.88487	-0.907837	5.42809	0.00018187	0.00076146
Asns	0.108603	0.510349	0.268384	18.8506	57.2227	0.299963	0.0982438	18.102	58.0006	-1.83289	5.04703	0.00022652	0.00092336
Gpt2	0.139737	0.374614	0.397547	6.28543	15.5815	0.505146	0.226836	6.2823	16.6954	-0.800838	4.24392	0.00039833	0.00150862
Ifitm2	2.42789	1.43803	1.10432	2.51655	14.3471	1.26584	0.44993	3.31794	19.1777	-1.43852	1.83468	0.00050832	0.00186127
Aurkb	0.598954	0.358879	0.0984558	0.312597	9.41514	0.407364	0.279253	0.18493	12.6533	1.42156	2.53699	0.00069887	0.00246958
Car12	1.80392	0.0908943	0.0771743	5.43267	7.79482	0.164338	0.211524	5.62585	7.53917	0.706843	3.60205	0.00090218	0.00308286
Cdca8	1.44991	1.90245	0.256533	1.27578	11.5415	1.58832	0.556885	1.23265	14.5121	0.926153	2.74738	0.00090343	0.00308591
Tmbim1	0.429058	0.626374	0.114833	1.23723	5.25284	0.53746	0.290116	1.17039	5.63873	1.06592	2.11112	0.00111812	0.00371032
Ccl3	3.76198	1.76694	1.62765	1374.53	647.363	3.49239	0.781737	1356.37	626.063	-0.668519	8.45161	0.00122367	0.00400271
Casp4	1.5854	1.30621	0.734438	19.2258	10.4574	1.15481	0.376143	15.5371	9.75194	-0.886812	3.27548	0.00153755	0.00486644
Dtl	0.321706	0.305116	0.0228149	0.373093	23.2812	0.213464	0.0940527	0.236805	24.1326	1.34517	4.54588	0.0016768	0.00524462
Gp49a	1.18878	1.53931	0.872462	84.006	11.7398	3.05431	0.465125	32.7263	6.95732	-0.756954	4.35964	0.00193074	0.00594046
Pecr	1.80677	0.386662	0.65505	4.64183	7.24611	0.373521	1.16432	4.31633	7.77356	0.589472	2.00065	0.00204772	0.00626549
Spry1	0.256098	0.520082	0.344161	209.503	55.5674	0.94966	0.168573	217.764	64.0876	-0.935815	7.24051	0.00224908	0.00679685
Phlda3	0.153707	0.162687	0.0470721	0.0568815	9.3089	0.162111	0.20626	0.0712659	14.3421	2.41301	2.16704	0.00233436	0.00701711
Tbkbp1	0.279043	0.152941	0.242961	20.2648	5.91072	0.249615	0.116195	20.9396	8.38207	-1.04444	4.39206	0.00285878	0.00832259
Rnf157	1.18577	6.51383	1.58834	8.41076	5.13252	5.26535	1.61431	9.76293	6.35239	0.600657	4.6153	0.00363126	0.0101606
Pdcd1lg2	0.437742	0.49288	0.0412173	29.9355	17.0645	0.511027	0.128057	32.2408	15.3978	1.01878	5.19262	0.00369957	0.010311
Vcam1	8.60564	0.0912541	0.0363303	0.168553	0.0136082	0.193398	0.00147423	0.202996	0.00945952	-5.57167	1.67964	0.00391429	0.0108101
Isg15	13.8326	2.33895	2.0976	9.11217	4.69734	2.44602	1.5857	9.31565	5.04866	-0.688107	2.11321	0.00401326	0.0110368
Psrc1	0.154462	0.252635	0.0637275	0.218356	15.9224	0.241831	0.196455	0.0208886	18.6503	2.09943	2.90173	0.00458842	0.0123899
Hk2	0.599248	0.263746	0.193004	20.7416	23.8122	0.348559	0.128084	19.5626	24.6709	-0.804693	5.78801	0.00531963	0.0141805
Mcm10	0.168624	0.209974	0.00406509	0.221746	16.6935	0.17219	0.0422851	0.160525	19.1434	2.78285	3.89392	0.00636425	0.0165281
Cep55	0.606335	0.407014	0.276822	0.265306	5.2733	0.454594	0.132467	0.281174	5.41771	-0.858818	2.15003	0.00641654	0.0166388
Socs2	0.272176	0.165081	0.464441	0.438284	4.22395	0.568181	0.226046	0.220471	5.7495	-0.686738	1.77862	0.00683999	0.0175652
Nek6	0.11463	0.0577109	0.0131607	7.50532	13.8508	0.0247462	0.0722493	1.46326	11.17	1.46935	3.63311	0.0072307	0.0184072
Chac1	0.0496442	0.342188	0.332149	35.3135	13.3571	0.333966	0.11546	33.8513	16.2027	-1.03015	4.12654	0.00955353	0.023395
Cd83	2.12166	2.89809	0.39163	40.1825	17.3299	3.36724	0.301551	42.1004	17.8596	-1.07296	4.92292	0.0113812	0.0272886
Ly6k	2.55975	1.06427	1.41473	3.6439	4.05286	1.62364	0.939532	3.25433	4.24714	-0.663044	1.05156	0.0122634	0.0290756
Pik3ap1	1.40449	0.494815	0.582615	2.62026	5.20607	0.487823	0.486665	2.72685	5.21185	-0.640434	2.5563	0.0151289	0.0349714
Dgat2	0.171025	0.167138	0.301439	12.2159	9.70325	0.227051	0.156774	12.6866	12.0008	-0.743725	3.59731	0.0207709	0.045547

## Sheet: memory TSLP 4h
rownames.diffexp.	media.0h	media.4h	media.24h	media.TSLP.4h	media.TSLP.24h	TCR.media.4h	TCR.media.24h	TCR.TSLP.4h	TCR.TSLP.24h	logFC	logCPM	PValue	FDR
Bcl2	35.9914	12.965	10.967	24.1803	39.3012	15.4685	14.0312	23.7343	41.4716	0.923383	7.4919	7.74074e-35	6.21736e-31
Ccl6	5.18081	2.66647	2.1752	6.13081	18.6146	1.67014	2.96257	5.43459	16.3066	1.30446	3.41009	1.22867e-31	4.93432e-28
Egr3	0.0610119	0.295733	0.179848	1.41049	0.344149	6.64101	1.42766	5.23161	0.93131	2.42671	1.52756	1.26282e-27	3.38098e-24
Slc1a4	0.112344	0.530351	2.07653	1.33734	3.18007	5.70925	3.2513	5.05972	4.15142	1.38917	3.60243	3.58954e-27	7.2078e-24
Gbp5	7.03658	6.30274	2.24074	10.4401	4.86034	6.05988	4.07825	8.86637	4.13171	0.796421	4.24389	1.44473e-21	2.32082e-18
Tnip3	0.304352	0.476867	0.484182	1.09155	0.369916	6.05861	3.69306	6.70364	3.05964	1.2775	3.34717	1.43542e-19	1.92155e-16
Mvk	2.23631	3.28842	3.49313	1.55817	3.31923	3.44568	3.84991	3.16038	3.68448	-1.12267	2.46177	1.99308e-17	2.28692e-14
Rgs11	7.1746	4.14949	4.78993	2.26068	6.73079	2.42035	6.52537	3.62728	6.17125	-0.929182	3.34248	5.10536e-16	5.12578e-13
H2-DMb2	7.00165	3.36815	3.21117	6.32275	1.85451	3.28513	3.86557	3.17044	1.79533	1.00395	1.64483	4.9993e-15	4.4616e-12
H2-Bl	39.0005	24.7692	28.0371	37.355	32.9947	34.8622	25.5968	22.1722	17.1916	0.622967	5.11767	8.80985e-15	7.07607e-12
Cmtr2	5.64365	5.23603	3.95101	3.27663	6.25355	6.12778	5.75813	6.00639	5.87888	-0.676923	4.32188	9.3199e-14	6.23812e-11
Gtse1	2.04396	3.3789	2.64782	5.19988	2.10131	3.2142	1.81117	2.9469	2.60238	0.687947	3.06532	4.60317e-13	2.84405e-10
Trf	63.2752	5.00119	0.358481	7.4862	0.735096	5.3775	0.325159	4.90955	0.110533	0.650744	4.20834	7.59995e-13	4.3602e-10
Prrt1	3.57091	4.66312	5.27588	2.38062	3.33678	3.71057	2.11684	3.29727	2.32965	-0.996057	1.73455	2.28376e-12	1.22288e-09
Ccl1	0.544546	0.741537	1.22438	2.39232	0.719623	250.837	38.5791	224.559	22.8869	1.78878	4.997	2.81951e-12	1.41539e-09
Hells	4.97133	5.47327	3.46452	3.51077	4.59932	5.18564	4.84909	6.1529	4.0635	-0.649504	3.89505	3.12892e-12	1.47832e-09
P4htm	5.76662	5.09865	8.22183	2.99926	7.12781	2.90973	5.29164	3.68012	7.02032	-0.729668	3.3445	4.58249e-12	2.04481e-09
Cyp4f16	3.71298	2.67694	3.63894	1.54143	3.18374	1.79307	5.01252	2.3516	3.2204	-0.845056	2.7744	1.41013e-11	5.96114e-09
Mlycd	2.81989	5.96197	5.45408	3.79941	3.63799	3.96404	1.60033	2.86455	1.96635	-0.652173	2.98106	4.63676e-11	1.67356e-08
Fos	413.735	1.99309	0.362056	3.1936	1.0678	4.81291	1.3736	5.32548	0.677451	0.755933	6.18365	7.1525e-11	2.3937e-08
Rgs16	5.97212	5.45525	2.33698	7.98186	2.25491	161.929	19.9706	152.573	20.0771	0.585178	6.69232	9.51727e-11	3.02789e-08
Idh1	7.42332	7.37528	7.52591	4.85761	6.94575	5.37507	4.53381	5.30976	4.68737	-0.591465	3.84185	9.80144e-11	3.02789e-08
Mettl1	18.1975	4.01844	4.77696	6.53319	6.58116	21.2854	5.69524	24.5468	10.4554	0.775841	3.35483	1.99184e-10	5.33283e-08
Rph3al	6.33749	6.14335	6.5833	9.30996	7.22429	6.09711	9.99306	5.08524	8.00349	0.679519	2.83323	2.2913e-10	5.9367e-08
Znrd1as	5.03335	5.94562	6.14542	8.93708	7.12568	5.12582	8.75736	4.65754	6.31622	0.662185	2.7547	2.81758e-10	6.90481e-08
Utf1	1.74541	1.94623	0.355882	0.882935	0.609623	16.0729	1.56064	13.1896	1.5378	-1.15332	2.36542	2.92285e-10	6.90481e-08
Zfp146	4.65592	4.36831	5.47172	6.3269	5.11846	4.32091	5.94727	5.18294	3.62046	0.601817	3.43559	5.34107e-10	1.12893e-07
Akr1e1	5.94683	3.77522	3.43435	2.28637	3.93145	3.81557	4.09184	3.92331	5.85039	-0.689759	2.87431	2.14416e-09	4.10044e-07
Fabp5	4.7991	3.16723	1.27479	1.68409	1.72978	4.99065	2.45586	5.22635	3.90316	-0.917091	1.67584	7.90685e-09	1.35123e-06
Tmem86a	3.00235	2.52276	2.96129	3.69433	4.29543	4.50076	3.41095	3.42707	3.50404	0.650852	2.73696	1.79681e-08	2.53193e-06
Gadd45g	23.7727	4.85586	1.82461	2.99816	3.01665	5.66395	2.65019	7.11195	2.19178	-0.649708	2.5939	8.66546e-08	1.07078e-05
Tnfsf14	20.5942	1.80509	2.30969	2.68085	2.95632	34.6007	4.22083	31.5594	4.99351	0.6434	4.45548	2.49797e-07	2.67516e-05
Rangrf	8.80824	6.34772	8.99231	4.24991	10.8038	8.59421	10.5579	7.94008	8.30469	-0.628477	2.86245	1.20211e-06	9.55974e-05
Sult2b1	3.00093	3.73183	2.10115	2.4493	2.38972	12.2334	3.29178	13.1483	2.31028	-0.597457	2.5726	6.88512e-06	0.000403328
Ptrh1	3.47091	3.3403	2.39293	2.16082	2.02557	3.91844	2.20727	5.06736	2.47699	-0.691394	1.53211	1.32452e-05	0.000656566
Bcat1	0.0924635	0.0932087	0.215552	0.04712	0.160901	5.02349	0.653994	4.34727	0.476853	-1.15397	3.37254	0.00048723	0.0103804

## Sheet: memory TSLP 24h
rownames.diffexp.	media.0h	media.4h	media.24h	media.TSLP.4h	media.TSLP.24h	TCR.media.4h	TCR.media.24h	TCR.TSLP.4h	TCR.TSLP.24h	logFC	logCPM	PValue	FDR
Ccl6	5.18081	2.66647	2.1752	6.13081	18.6146	1.67014	2.96257	5.43459	16.3066	3.05309	3.41009	8.28127e-182	6.65151e-178
Bcl2	35.9914	12.965	10.967	24.1803	39.3012	15.4685	14.0312	23.7343	41.4716	1.78917	7.4919	3.70802e-122	1.48914e-118
Slpi	45.5395	3.44253	0.37424	3.77354	5.74614	3.41768	0.24773	4.96243	9.38777	3.75608	2.72532	4.48332e-85	1.20033e-81
Rab5c	12.8516	14.182	29.3084	14.7278	10.7387	13.4867	13.8033	13.7228	10.6575	-1.4428	4.63227	2.01148e-69	4.03905e-66
Tspan17	1.8755	1.87718	4.99789	2.01347	1.36141	0.987561	3.32654	1.20961	4.07243	-2.07434	2.04857	2.31349e-60	3.71639e-57
Cotl1	239.163	263.24	571.797	228.387	283.305	475.472	292.776	256.929	405.34	-1.06057	9.18523	3.47445e-47	4.65113e-44
Emd	13.7485	20.3163	29.692	17.7596	13.782	16.0186	12.3239	16.3999	18.681	-1.14561	4.90989	4.0209e-46	4.6137e-43
Cd151	1.87981	3.76666	8.23613	3.85501	3.22204	4.20501	3.51287	3.00467	5.2435	-1.39361	3.09058	1.23229e-45	1.23722e-42
Ralgds	1.71612	7.12091	4.41091	5.27762	1.83469	4.62924	1.7627	3.12632	1.30195	-1.38847	3.79174	3.90599e-45	3.13729e-42
Sesn2	6.95693	6.24261	2.18586	6.0766	5.79092	9.42773	5.87924	12.4775	5.14311	1.47024	4.21267	3.94872e-44	2.88328e-41
Hdc	1.12707	2.08209	0.597484	1.4039	2.26615	1.5439	0.957259	2.49065	2.78038	2.19385	2.14884	2.90546e-42	1.94472e-39
Kremen1	1.61692	3.62002	4.33364	3.23987	2.02822	2.87452	1.82299	3.12159	2.1248	-1.20657	3.85353	2.60658e-39	1.61046e-36
Hspa1b	202.314	5.42959	0.160172	5.42741	1.08551	4.72252	0.17067	5.39005	0.373626	3.08213	5.7205	5.7506e-38	3.2992e-35
Cep152	4.53796	6.41855	3.23657	6.93942	6.84776	5.15392	6.35092	5.93739	5.28689	1.0592	5.10391	8.29989e-38	4.44432e-35
Slc12a9	5.10504	5.72142	2.86947	5.42294	6.55358	4.30863	5.19012	5.004	5.53704	1.11058	4.14192	8.58856e-37	4.31146e-34
Gvin1	42.5062	15.5331	11.397	22.7444	22.3932	13.6593	14.3514	19.4748	22.3905	0.942283	7.54864	2.38235e-36	1.12559e-33
F2rl2	13.9051	3.26219	0.922341	3.2021	2.75538	3.47547	1.01993	4.28722	1.75354	1.70008	3.16676	6.39488e-35	2.85354e-32
Uhrf1	6.04721	4.89197	0.464714	4.71095	1.5184	4.61597	1.02466	5.26537	1.31725	1.8134	3.58263	8.81776e-33	3.72759e-30
Zfp457	0.869763	1.67725	3.31992	1.62789	1.44437	0.890223	2.71022	1.56046	2.10533	-1.53737	2.04959	1.22135e-31	4.90494e-29
Fam105b	6.86448	12.7592	13.8012	10.5121	6.91656	13.4187	6.43559	10.6106	6.74381	-1.02612	3.94585	1.66086e-30	6.35241e-28
Pelp1	10.3731	10.6765	6.05414	11.4935	11.7974	12.5355	9.06287	13.4265	10.4469	0.955516	5.25825	2.60123e-30	9.49686e-28
Lamp1	14.044	34.9442	32.386	26.9148	18.1784	30.1131	10.7537	17.6386	12.6844	-0.871997	5.70947	2.045e-29	7.1415e-27
Stk11	6.11367	11.3922	14.5915	10.3064	7.56558	10.5994	7.73524	7.43251	5.47785	-0.974126	3.96727	4.16811e-29	1.39493e-26
Trpm4	2.47111	5.28072	2.17743	4.91396	4.4793	3.54704	4.94718	3.54107	4.05587	1.01372	4.14595	2.11689e-28	6.80113e-26
Pnrc1	56.2998	79.742	78.7214	69.0224	45.5513	75.6826	26.6305	46.1447	27.3141	-0.827321	6.80999	3.73057e-28	1.15246e-25
Trim28	9.45617	15.5987	17.2239	12.3536	9.75745	15.5945	9.39782	11.3457	9.97706	-0.866603	5.39516	4.22117e-28	1.25572e-25
Chtf8	15.0971	13.789	28.3246	16.6937	16.2607	18.5042	11.369	14.5221	11.1767	-0.846119	5.6529	5.17766e-28	1.48525e-25
Trappc10	2.15655	5.05727	5.23854	3.66728	2.83222	4.0469	2.772	2.73242	3.15564	-0.934294	4.24124	2.85557e-27	7.90895e-25
D10Jhu81e	35.4934	27.8596	46.2094	26.5626	26.8553	21.4184	26.3253	23.2344	31.8487	-0.836842	5.39331	1.22482e-26	3.27925e-24
Socs2	6.62302	2.35656	1.02792	3.16716	2.77551	2.84263	1.04853	4.03476	4.2436	1.44806	2.78791	1.34518e-26	3.48532e-24
Gbp5	7.03658	6.30274	2.24074	10.4401	4.86034	6.05988	4.07825	8.86637	4.13171	1.01026	4.24389	2.07486e-26	5.20789e-24
Incenp	13.1038	16.7051	8.56383	15.7791	15.802	16.0451	14.7791	16.6952	13.2364	0.824237	5.61197	4.21637e-26	1.02624e-23
Rab27a	29.1974	16.7247	10.1813	16.9163	18.8008	16.999	16.8286	19.3141	16.1108	0.816221	5.76522	4.38564e-26	1.03604e-23
Atp11c	2.36713	3.41244	4.15633	3.63824	2.37477	4.36216	2.20812	4.45794	2.73567	-0.92115	4.41657	5.07257e-26	1.16408e-23
Bloc1s3	1.48478	6.7351	6.11491	4.84163	2.88608	5.76659	3.00425	3.77896	2.30311	-1.08561	3.01655	1.18256e-25	2.63842e-23
Jund	38.2822	32.3955	23.906	27.5872	14.0378	31.2194	8.04237	16.9001	7.35886	-0.811234	6.00658	1.38863e-25	2.99496e-23
Lilrb4	42.8581	45.0829	9.03613	46.2643	17.738	97.1035	15.221	125.937	17.5325	0.890818	6.08792	1.41694e-25	2.99496e-23
Rac1	18.5122	43.0467	35.5693	35.811	20.9091	35.6346	18.2996	23.3786	18.3612	-0.802962	6.05138	1.95959e-25	4.03575e-23
Zfp39	5.14314	8.04611	5.06266	7.33582	9.23696	6.43005	7.05753	7.06023	7.33568	0.882479	4.84404	7.34825e-25	1.47553e-22
Cited2	7.49719	12.9575	15.8123	10.3598	8.88341	9.82907	5.65691	5.84262	4.95622	-0.856328	4.23847	9.38972e-25	1.81298e-22
Hspa1a	143.108	5.58816	0.172245	5.77103	0.817613	4.32262	0.126113	6.27154	0.19879	2.51034	5.30474	9.48024e-25	1.81298e-22
Tnfsf8	8.03397	5.68738	2.58085	5.22859	5.35478	13.7564	6.67521	19.0512	9.13902	1.09951	4.29341	2.18263e-24	4.07694e-22
Parp10	31.9621	19.331	13.093	19.6304	23.0862	17.0555	18.9023	19.329	17.0954	0.777995	6.11252	2.36631e-24	4.31959e-22
Casd1	3.12381	6.34058	7.74987	5.15804	4.4593	5.18312	2.90415	3.24697	4.18456	-0.865594	4.2343	3.78833e-24	6.76176e-22
Npm3	14.0184	15.1753	21.2476	10.4051	11.077	14.2803	10.1912	13.2598	15.8021	-0.899155	3.66638	5.86141e-24	1.00195e-21
Pak4	4.78609	6.38022	2.41115	7.04674	4.87103	6.80257	2.10302	6.67259	2.39637	1.01448	3.86495	5.86299e-24	1.00195e-21
Atp1a1	37.9972	70.4747	109.864	68.4707	67.8765	88.4814	52.9605	57.3467	47.9324	-0.741389	8.04913	6.99852e-24	1.17109e-21
Gfi1	1.53814	2.73206	4.26405	2.92724	2.16833	5.64251	1.79555	3.18147	1.74554	-1.02421	3.13821	8.71945e-24	1.42928e-21
Rnf130	3.47362	6.73935	7.5461	6.48517	3.83914	5.03025	2.97651	3.91045	2.84298	-1.03346	2.92682	9.83154e-24	1.57934e-21
Dusp2	42.2247	44.8264	33.4499	33.7609	19.7132	60.9493	18.8806	42.6751	22.164	-0.789547	5.8778	1.36105e-23	2.14352e-21
Alcam	1.39626	3.23524	3.07779	2.46248	1.70644	5.631	2.17508	4.45603	1.9646	-0.959252	3.94716	1.86952e-23	2.88769e-21
Tnfrsf4	1.04321	3.49799	3.12508	3.22975	1.1897	5.82825	4.27808	6.21208	3.35238	-1.62131	2.149	2.77894e-23	4.21141e-21
F2rl1	12.1145	17.55	23.7424	17.723	14.3692	12.0028	20.5535	15.1565	17.1551	-0.766206	5.628	6.50332e-23	9.67308e-21
Tmem57	4.07481	9.85228	12.0075	8.98012	7.28721	8.7364	7.20182	8.27364	7.12882	-0.799157	5.06491	6.99568e-23	1.02162e-20
Ssx2ip	0.709302	4.78785	5.4179	4.498	3.05044	4.83919	1.4607	3.05018	2.57921	-0.885881	3.74763	8.01215e-23	1.14917e-20
Pex10	5.16302	5.78855	3.88017	6.09036	7.97836	7.02485	5.18644	5.64384	4.68185	0.944387	3.31251	8.6591e-23	1.22017e-20
Gatsl2	2.51359	6.35445	3.19971	6.80818	5.82056	5.03633	4.3756	5.57375	3.25847	0.790754	4.60119	1.07764e-22	1.49235e-20
Sh3bp2	6.69943	3.92188	1.71777	3.82509	3.67625	11.1202	10.56	11.7037	6.16428	0.983571	4.40595	1.47521e-22	2.00828e-20
Tysnd1	3.44902	8.66214	8.87137	6.52646	5.00902	7.15518	3.17116	4.90238	2.93678	-0.867839	3.77363	1.53372e-22	2.05313e-20
Edc4	42.316	54.847	38.523	58.8242	65.4191	58.8626	51.2958	57.4576	52.7368	0.717041	8.02886	1.78694e-22	2.3529e-20
Glud1	16.9652	42.3824	35.7947	40.1293	22.1201	38.6944	15.0369	26.1549	16.0162	-0.735149	6.54967	2.90312e-22	3.76094e-20
Cul3	9.65799	8.53891	10.9487	7.24273	6.4011	8.82587	7.89608	6.71461	8.3057	-0.805405	4.57571	4.80881e-22	6.13085e-20
Coq2	5.31126	7.62063	10.2906	6.02306	5.69579	8.27971	3.76461	5.65209	3.97475	-0.876458	3.5072	6.65239e-22	8.34875e-20
Klf2	70.9176	91.2412	87.8451	75.2322	54.8963	62.2	28.3359	38.5601	33.3752	-0.71926	6.8211	7.29606e-22	9.01569e-20
Sun2	2.51826	6.62367	8.81298	6.80478	5.33104	5.37376	4.97551	3.9389	4.46547	-0.80976	4.47461	7.78949e-22	9.47957e-20
Zfp367	3.87353	6.09116	8.4828	4.66623	5.18465	5.50693	4.99516	6.32586	6.22539	-0.817749	4.41539	8.74951e-22	1.0489e-19
Runx2	5.7889	12.1803	12.3794	11.5222	7.6809	11.3732	5.6693	9.66787	6.08223	-0.740155	5.97229	1.25766e-21	1.48552e-19
Copg2	6.48529	7.93149	11.1777	6.92404	6.81021	5.19582	8.03919	6.34106	8.35247	-0.764681	5.00001	1.45307e-21	1.69146e-19
Fus	33.3295	58.5865	20.6342	54.7287	34.9584	48.7766	38.1844	65.4164	26.8091	0.718881	6.36374	2.14369e-21	2.45973e-19
Atmin	3.92361	7.17723	7.55261	6.37217	4.56068	6.8767	3.0199	5.69531	2.95708	-0.780339	4.78425	3.09614e-21	3.50256e-19
Alyref	7.34373	11.4073	10.173	8.92404	5.53882	12.3453	4.76366	8.85976	4.07038	-0.966181	3.28314	3.69972e-21	4.12725e-19
Taf10	17.5617	49.9697	43.284	49.5903	25.7026	54.4827	13.4236	31.3029	16.9471	-0.782258	4.74925	3.83007e-21	4.21412e-19
Zfp488	8.01537	14.662	25.4865	15.2316	16.5517	10.8141	35.2159	12.7823	18.7697	-0.727477	6.37532	5.34019e-21	5.79628e-19
Pik3cd	226.798	131.689	116.924	153.179	192.274	114.554	135.537	138.679	169.138	0.681562	9.65134	8.71865e-21	9.33709e-19
Swsap1	5.46998	6.24452	12.2761	6.08921	7.25494	5.70439	7.63076	6.65878	7.15204	-0.809387	3.82313	1.11526e-20	1.17865e-18
Panx1	17.4702	26.2145	28.9924	23.2408	18.2712	25.3822	9.7201	16.6126	10.8813	-0.722362	5.41684	2.36187e-20	2.46371e-18
Raly	20.542	36.2381	41.759	37.2333	26.3832	34.9589	20.4299	23.8049	25.3235	-0.706232	5.82514	2.87459e-20	2.96009e-18
BC053749	4.42679	3.56392	2.5827	3.32586	4.98407	2.57254	4.1935	2.91227	3.29869	0.982962	3.1858	3.06161e-20	3.11277e-18
Selt	9.80503	8.4901	14.4839	8.58857	9.04414	8.60325	12.0869	8.45639	7.61014	-0.728504	5.18566	3.48056e-20	3.49448e-18
Chsy1	15.0666	5.82022	8.28391	5.10212	4.98981	6.81112	6.48507	6.37488	6.28374	-0.754625	4.92868	4.48517e-20	4.44752e-18
Abcd1	18.9638	12.2174	10.5717	14.0091	17.8892	11.1516	16.5484	11.6131	15.2328	0.712777	5.65635	4.66788e-20	4.57225e-18
Sfxn2	6.66169	4.30484	3.90702	4.51034	6.99693	3.68516	6.38528	3.84073	5.82178	0.816044	4.09642	5.74135e-20	5.55596e-18
Bnip1	19.4895	12.0711	17.4617	10.6697	10.3481	13.611	12.5377	13.0347	14.054	-0.815456	3.9417	8.18929e-20	7.83052e-18
Ppp3cc	20.0848	25.2912	42.3287	24.6301	27.0685	23.5401	18.349	16.8278	16.8303	-0.69619	5.61913	1.11834e-19	1.05677e-17
Nsmce4a	15.755	60.9685	52.6712	58.0081	33.3665	54.8781	18.3107	31.7464	18.5958	-0.6967	5.86654	1.14672e-19	1.07098e-17
Calm3	40.0333	50.3523	56.132	46.234	36.4951	50.1596	30.978	40.228	34.6905	-0.684486	6.63313	1.17115e-19	1.08123e-17
Plk3	2.98972	3.03866	1.30232	2.68667	2.70459	13.2356	2.72652	7.23999	2.54057	1.19192	3.41615	1.89147e-19	1.7264e-17
Tsc22d1	3.05511	17.1094	31.4798	17.4691	20.6777	18.2779	25.5766	15.2717	18.7631	-0.668497	6.54192	3.82376e-19	3.45084e-17
Fam98a	12.8131	8.51787	5.98858	8.34501	10.5381	12.1449	9.43276	11.6294	8.23309	0.70982	4.83114	5.27044e-19	4.70358e-17
Zfp664	6.70295	7.72989	4.65311	7.67963	8.01507	8.18014	6.18336	7.07514	5.14703	0.718048	4.8755	5.74853e-19	5.07387e-17
Akirin2	2.89814	6.33103	5.91177	5.41122	3.19202	4.99938	2.24895	3.76249	2.2801	-0.926977	2.9122	6.33632e-19	5.53188e-17
Dirc2	1.86257	4.63032	5.48167	4.55303	3.36334	3.36468	1.46807	1.87742	2.28033	-0.763536	3.96234	6.70297e-19	5.78906e-17
Pgp	9.2043	34.728	39.1169	28.9235	24.7592	31.1473	9.9198	21.9292	9.5411	-0.717441	4.68291	7.15932e-19	6.11741e-17
Faf1	2.79856	7.84742	6.19429	6.77035	3.80092	6.43462	2.69089	3.96689	2.34255	-0.750854	4.47951	7.28478e-19	6.15909e-17
B4galt5	10.8377	12.2982	7.258	11.9787	12.3093	13.2683	10.3057	11.2976	8.99817	0.686693	5.59179	7.9038e-19	6.55987e-17
Mrps30	13.2302	30.1154	29.8128	26.013	18.9691	31.1646	9.95183	22.8679	10.4403	-0.703209	5.16694	7.92215e-19	6.55987e-17
Nfil3	9.12539	6.7323	6.46555	5.26968	3.71157	8.70139	1.7593	5.5759	3.22754	-0.866401	3.513	8.45648e-19	6.93086e-17
Ubald2	42.2065	44.57	51.5984	41.2251	33.2425	51.2954	28.9294	36.0932	33.7282	-0.676094	5.96867	1.27232e-18	1.03225e-16
Dnmt3a	1.93036	2.39437	2.30998	2.39754	1.45735	3.98796	1.77178	4.40066	1.50367	-0.791903	4.66149	1.29274e-18	1.03833e-16
Ier5	27.2995	22.3126	21.5303	20.9167	13.8123	30.4691	7.59605	17.9063	8.35034	-0.682562	5.98249	1.42384e-18	1.1323e-16
Prpf19	17.8233	14.7892	8.81311	15.031	14.6061	15.0035	13.165	15.2793	13.2873	0.665056	6.514	1.68837e-18	1.32951e-16
Zfp36l2	81.1231	80.1503	67.137	68.5148	43.9923	57.9264	25.1242	36.0082	27.3945	-0.649556	7.60685	1.78314e-18	1.37808e-16
Aff1	3.59877	4.3053	2.65016	4.08203	4.40236	4.15219	4.59579	4.60106	2.89038	0.697753	5.10898	1.78436e-18	1.37808e-16
Naa30	2.88748	7.17858	6.84688	5.58843	4.28576	5.37785	2.91415	3.69698	3.12512	-0.733092	4.50792	2.16084e-18	1.65294e-16
Lgmn	17.9887	3.26588	1.03566	3.76817	0.336598	2.00635	1.22335	3.99652	0.442208	-1.87289	2.68804	2.22696e-18	1.68745e-16
Snap29	14.4513	14.0493	7.49511	14.1112	12.469	11.0962	11.0706	13.5215	10.4337	0.70685	5.42777	2.86528e-18	2.14087e-16
Mfsd3	4.52076	5.63228	9.39581	5.03131	5.85725	5.46277	7.90184	6.35749	6.30478	-0.775012	3.85997	2.87866e-18	2.14087e-16
Mcpt8	0.190028	0.140393	3.85661	0.328383	8.26712	0.472731	0.434972	1.00038	4.52481	0.898134	1.08036	3.13004e-18	2.30647e-16
Mtch1	4.35432	7.33603	8.77013	5.28844	5.20769	6.81269	3.67558	4.52262	3.45517	-0.79909	3.47526	3.25894e-18	2.37962e-16
Sec14l1	8.17798	9.67497	4.63656	8.37019	7.68651	9.89388	4.59174	9.45215	5.34932	0.720121	5.21342	3.71629e-18	2.68912e-16
Zfp513	11.3085	13.9252	6.92471	15.6338	11.984	13.9029	10.0754	14.0675	8.57012	0.733051	4.78342	4.73394e-18	3.39491e-16
Ppp2ca	14.05	30.9609	29.8291	26.7292	19.2162	28.8166	11.1153	17.9203	13.1724	-0.673847	5.4428	5.43223e-18	3.86121e-16
Tango6	6.1309	6.1678	5.02529	6.06767	8.55084	5.45392	6.90424	5.92568	7.00783	0.683327	4.88281	6.17671e-18	4.35187e-16
Upf1	9.01207	21.7734	18.1094	18.2359	11.9134	21.8909	6.48993	13.3002	7.29475	-0.662545	6.11464	1.05561e-17	7.37272e-16
Usp20	21.8109	12.4405	16.0113	10.1799	25.7049	10.4725	21.2772	9.83278	20.1484	0.644914	6.15385	1.27284e-17	8.81335e-16
Elk4	5.03586	7.94693	7.85175	7.25378	4.96463	8.89165	3.63156	7.94036	3.35077	-0.73804	4.61451	1.54994e-17	1.06403e-15
Crtap	1.60065	5.08327	5.68459	4.02957	3.13368	4.8278	1.83811	3.18256	1.72898	-0.887136	2.6714	1.82735e-17	1.24384e-15
Fbxo28	4.28967	11.9057	11.4698	12.1219	7.42271	10.0199	5.705	6.75765	4.53928	-0.668763	5.43039	2.02667e-17	1.36792e-15
Ppm1a	4.89835	14.4208	12.5561	13.1028	7.89036	12.1861	5.85886	8.86019	6.1148	-0.689514	4.82005	2.11979e-17	1.41568e-15
Cyp51	4.71517	5.72611	3.31876	5.50613	5.62914	8.36037	7.20467	8.17665	6.83882	0.75174	4.82684	2.13269e-17	1.41568e-15
Tmem110	2.68411	6.86705	6.04003	6.72982	3.77026	6.44977	3.04434	5.57963	3.01022	-0.748934	4.28614	2.25672e-17	1.48574e-15
Ybx3	4.72002	4.63783	4.81219	3.92126	2.66737	6.44409	3.80226	6.39983	3.54354	-0.911437	3.15014	2.41313e-17	1.5758e-15
Mtm1	3.69779	4.47613	2.11768	4.81166	3.85407	3.90993	4.16197	4.66847	3.77545	0.846341	3.85658	2.81446e-17	1.82304e-15
Dhx36	4.13658	10.5886	9.85384	9.99099	6.37121	8.05514	4.07124	6.8724	5.30592	-0.674379	5.25678	3.22636e-17	2.07313e-15
Tfrc	3.74262	2.94945	2.01073	2.54962	3.56075	10.6494	4.86921	10.4558	2.9459	0.756817	4.65732	4.44397e-17	2.83285e-15
Aldoc	2.05207	1.78094	3.02264	1.69426	5.68509	1.65668	4.65055	1.62648	4.5911	0.918075	2.43695	5.07666e-17	3.21069e-15
Ikbkap	9.40382	8.47487	6.72651	9.01993	10.7914	11.7498	8.98503	12.4596	9.15543	0.648285	5.96273	5.12467e-17	3.21573e-15
Eya2	31.5595	12.1967	15.094	12.9664	24.4314	6.7666	21.1734	8.63008	17.833	0.651762	5.38749	6.70585e-17	4.1753e-15
Hist1h1e	5.80922	2.39227	7.82636	2.43726	4.51029	2.66584	3.80178	2.32188	4.88173	-0.77478	3.02596	8.23226e-17	5.08627e-15
Aggf1	4.64845	13.8358	13.3024	12.7992	8.65076	15.6307	5.45188	10.0086	5.20648	-0.673039	5.10534	8.86856e-17	5.43758e-15
Eif3f	40.8456	58.8332	80.0697	54.9329	53.4314	55.7128	33.7924	45.2104	45.607	-0.624878	6.37001	1.21681e-16	7.40409e-15
Chd1	4.72456	13.0022	11.6038	12.1931	7.71948	13.7829	6.41879	10.184	5.40142	-0.632042	6.3152	1.64161e-16	9.91383e-15
Xkrx	7.46618	2.81045	9.14887	4.14161	5.57637	2.26003	15.1811	2.56048	16.4155	-0.717665	4.49358	1.72358e-16	1.03312e-14
Dexi	1.47377	5.01706	6.40572	3.99033	3.48248	3.96355	2.96188	2.27141	2.1661	-0.881437	2.40701	1.73982e-16	1.03513e-14
Pkig	6.06905	5.80472	4.75549	5.80276	2.56436	6.22098	1.73565	5.36047	2.94841	-1.06974	2.45495	1.81264e-16	1.07052e-14
Gga1	55.7776	53.0132	30.9271	51.4368	48.7343	46.7883	38.1347	48.0012	39.1402	0.614717	7.16272	1.8987e-16	1.11317e-14
Hnrnpd	2.9387	4.22172	4.38485	3.80241	2.80326	4.31068	2.40473	3.57121	2.84295	-0.683424	4.63779	1.96805e-16	1.14546e-14
Pigl	7.472	3.5081	7.69265	3.70472	4.63481	3.61083	4.45495	4.5452	4.85509	-0.827074	3.08744	2.11795e-16	1.22384e-14
Rnf187	17.7643	43.8692	55.32	35.1255	37.0331	34.8219	22.4423	20.7318	22.7237	-0.620671	6.05437	2.21637e-16	1.27157e-14
Usp7	5.53446	7.69385	9.27346	6.31807	6.10046	6.20081	6.54502	7.0492	6.98175	-0.647185	5.29861	2.3782e-16	1.35473e-14
Zmym1	8.19845	13.9932	17.1426	13.5018	11.5866	13.2349	12.0183	13.5482	12.3778	-0.63759	5.71335	2.46853e-16	1.39629e-14
Map1lc3a	5.24511	17.9643	12.2016	17.2743	7.32849	18.608	5.0424	14.7158	3.84181	-0.799605	3.65313	2.93057e-16	1.64604e-14
Wnk1	3.60576	4.89255	5.09665	4.65819	3.34186	4.98595	3.11425	4.29182	3.23079	-0.638881	5.61895	3.88283e-16	2.16576e-14
Retsat	3.9476	3.72592	6.90382	3.67337	4.28413	2.72351	5.41582	2.35365	4.19291	-0.794753	3.08897	5.08021e-16	2.81409e-14
Slc25a28	5.04134	12.149	12.3775	12.6106	7.70376	13.1485	7.36912	8.23856	5.32775	-0.722047	3.93036	6.35163e-16	3.49427e-14
Telo2	11.4911	6.65313	6.51968	6.323	10.5125	9.226	9.46116	10.6441	8.96489	0.662743	5.02046	6.4673e-16	3.5337e-14
Eme2	14.4662	16.1585	12.0651	15.7107	20.103	19.5376	18.1139	20.8709	14.9571	0.653295	4.75786	7.87743e-16	4.2751e-14
Zfp438	2.17676	1.91076	4.63655	1.9738	3.01884	1.74587	4.36119	1.64759	3.17131	-0.772889	3.24834	1.02552e-15	5.52818e-14
Ptpra	10.1833	22.7845	24.2991	21.9162	16.4959	17.6007	13.2023	11.1479	12.3445	-0.612481	5.99629	1.07695e-15	5.76673e-14
D14Abb1e	4.9841	7.22155	10.3098	7.24515	6.98872	6.17209	5.6369	6.53362	5.70207	-0.620999	5.7687	1.12805e-15	6.00034e-14
Itgav	1.04082	3.20752	2.63821	2.79173	1.64306	3.92929	1.29076	2.95404	1.82413	-0.731104	4.16025	1.31638e-15	6.95605e-14
Fyn	43.0276	83.9194	76.8984	78.0747	52.6964	128.03	30.2859	80.0074	32.7191	-0.587307	7.9612	1.68246e-15	8.83239e-14
Abcg3	15.783	2.10531	4.30096	2.86865	7.16246	1.54346	5.83447	1.69082	7.28051	0.691482	4.00249	1.78312e-15	9.29999e-14
Psip1	13.0585	26.9384	25.3562	25.1899	17.2338	21.8399	9.13628	14.2122	10.4434	-0.60856	5.92909	1.89778e-15	9.83419e-14
Nat9	7.29311	6.97823	10.8242	6.87505	6.84503	6.97225	10.3537	7.91143	7.28236	-0.797066	3.25026	2.12829e-15	1.0958e-13
Rab24	12.5554	30.2866	36.1521	29.9307	24.5342	33.2156	12.3212	22.5954	11.2079	-0.612887	5.54737	2.16079e-15	1.10544e-13
Map3k3	7.36041	16.9889	15.8717	14.987	10.6206	14.3216	7.51251	9.83081	8.56837	-0.632206	5.30063	2.32193e-15	1.18036e-13
Zdhhc7	12.5772	22.1761	23.1035	20.3463	15.6507	20.8616	9.07966	15.3237	8.84737	-0.61753	5.6231	2.39928e-15	1.21201e-13
Ctbp1	19.4661	41.5166	41.0429	34.5216	27.9149	39.6307	16.9306	25.2231	17.0105	-0.597576	6.25792	2.46944e-15	1.23966e-13
Otud5	15.6099	44.8504	38.0034	43.6946	25.8249	39.545	13.1008	25.378	13.545	-0.604033	6.24828	2.59628e-15	1.29524e-13
Etnk1	3.79152	5.72002	6.09071	5.33345	4.0259	4.79131	3.07495	3.79438	2.70232	-0.651252	4.89286	3.24203e-15	1.60741e-13
Mapk1	12.4866	26.2092	23.9072	25.3152	16.3409	25.3663	11.221	15.2967	10.1379	-0.594993	6.64111	3.29308e-15	1.6227e-13
Zranb1	2.5078	5.53113	7.11392	5.40665	4.43256	4.90235	3.32853	5.07694	3.59495	-0.72854	3.40503	3.91026e-15	1.91507e-13
Top2b	12.7592	32.4788	27.2806	30.312	18.6015	25.1768	13.7035	18.9964	15.2111	-0.588709	7.01193	3.94368e-15	1.91973e-13
D8Ertd82e	20.9974	5.40695	6.69807	4.8988	10.4833	11.798	10.9364	12.7532	14.1358	0.606685	5.7229	4.53113e-15	2.19241e-13
Habp4	3.65699	6.94752	12.5796	5.53506	8.26873	5.30409	4.32761	3.22367	3.41612	-0.648388	4.02498	4.64497e-15	2.23404e-13
Kif3b	5.87321	5.02483	2.66032	5.17362	4.28244	4.45467	3.54827	6.30106	3.48324	0.671037	4.72969	4.68668e-15	2.24068e-13
Fos	413.735	1.99309	0.362056	3.1936	1.0678	4.81291	1.3736	5.32548	0.677451	1.73095	6.18365	4.77309e-15	2.26849e-13
Nudt13	5.84926	4.55065	3.12191	5.33875	5.47295	4.23499	5.66127	4.42603	4.46493	0.770094	3.653	5.13326e-15	2.42531e-13
Tnks2	6.80583	8.63013	11.4151	7.56042	7.7784	6.76953	7.42055	6.73554	7.25811	-0.599098	5.7435	6.25406e-15	2.93758e-13
Pdgfb	5.14557	3.32913	4.06575	2.77308	2.56106	4.43365	3.91216	4.02597	3.51746	-0.783836	3.51028	6.49961e-15	3.03517e-13
Pvr	6.59103	4.98257	7.05943	5.03046	4.63944	4.53331	5.54258	5.31283	5.19087	-0.694565	4.04411	6.67317e-15	3.0982e-13
Socs3	71.738	33.2572	15.947	38.8183	25.0154	26.2548	11.6548	28.7326	19.7958	0.612577	6.32238	6.93894e-15	3.20308e-13
Smarcd2	19.9178	49.3221	42.4845	47.5852	29.1351	44.128	15.2876	29.964	18.4216	-0.586163	6.58065	7.59997e-15	3.48817e-13
Poli	16.7515	11.649	10.6333	11.6991	16.7813	12.319	14.9059	12.4247	13.8144	0.633186	5.26037	1.0108e-14	4.58687e-13
Vmn1r58	4.67779	8.31073	13.8735	9.01125	9.61659	6.62259	18.8271	7.21761	11.11	-0.660936	4.8649	1.03463e-14	4.66864e-13
Slc26a6	5.54343	4.2896	3.65815	5.23869	6.01523	4.64968	4.61947	6.05629	4.80037	0.751077	3.828	1.32911e-14	5.96394e-13
Slc30a9	7.96596	13.3457	16.5961	13.838	11.3308	13.8438	6.04807	10.2513	7.30391	-0.599882	5.33322	1.64105e-14	7.32274e-13
Klrb1f	5.07151	4.92634	8.39927	4.10662	5.47716	3.44051	5.95733	3.49347	6.78177	-0.746987	3.26759	1.89423e-14	8.37962e-13
Actr5	1.86597	5.34252	5.35527	5.01192	3.31085	4.50329	1.95978	3.06202	2.42051	-0.747953	3.2172	1.89877e-14	8.37962e-13
Parp16	8.97823	6.08057	12.0688	6.23634	8.24707	4.96708	6.25379	5.84462	8.52855	-0.648133	4.28758	1.97183e-14	8.65452e-13
Bcl2l1	45.2364	15.5361	11.238	17.3486	17.9695	26.9649	14.675	27.7563	17.5024	0.607718	5.66986	1.99495e-14	8.7065e-13
Fam134b	6.45132	12.5727	9.96198	12.1943	6.72866	11.2692	6.78116	10.944	8.27652	-0.639147	5.0114	2.08638e-14	9.00959e-13
Samd11	7.13122	8.4213	10.7645	7.30327	7.15963	10.3418	5.34114	8.51258	5.88544	-0.639471	4.4343	2.1797e-14	9.31241e-13
Samd4b	3.27071	4.81073	3.75851	3.26248	2.43894	3.66932	3.34552	3.48475	2.57679	-0.722991	3.97351	2.23076e-14	9.48012e-13
Faim3	1.91106	5.70757	2.33169	6.26349	1.19338	3.71129	2.42902	3.17283	1.17914	-1.22893	2.34822	2.34502e-14	9.91326e-13
Tab2	8.63017	10.5111	14.4224	9.97675	9.82618	10.154	9.77703	9.99797	11.6234	-0.591747	5.57608	2.46201e-14	1.03533e-12
Fam117b	3.33415	5.49921	5.13631	5.38558	3.4398	4.51061	3.41447	4.41174	3.46294	-0.649402	4.65173	2.55821e-14	1.07018e-12
Grwd1	43.1042	14.8002	17.2763	13.6443	27.1477	43.2535	22.2978	45.402	30.0464	0.614739	5.79329	2.93477e-14	1.21506e-12
Dars2	7.5216	7.81126	5.48481	6.41492	8.69378	7.47299	8.72302	6.85162	7.95761	0.65747	4.80235	3.61539e-14	1.48917e-12
Rnf11	2.59789	10.7184	7.97707	9.73575	4.97357	9.4261	2.88773	5.48094	3.35786	-0.678169	3.85204	4.16937e-14	1.69133e-12
Tldc1	5.5927	7.4972	3.96285	7.02366	6.50567	8.29899	5.54509	8.44437	7.1864	0.746301	4.17202	4.28473e-14	1.72939e-12
Gcsh	10.1123	11.7755	6.12257	10.0294	10.2418	19.1422	8.6968	17.7533	8.43252	0.771068	3.98574	5.24177e-14	2.10509e-12
Gls	2.61643	3.38766	5.23851	3.13088	3.48187	3.3749	4.20568	3.22333	2.88523	-0.636615	4.2191	5.28956e-14	2.11372e-12
Ubfd1	10.1855	8.59999	9.13062	9.19168	6.37273	8.9054	5.1892	7.92132	6.22303	-0.610184	5.32772	5.55317e-14	2.20807e-12
Ube2r2	5.77022	18.8002	13.1578	16.154	8.95777	15.6947	7.74617	10.4155	8.26779	-0.60237	5.354	5.5929e-14	2.21291e-12
Slc35d1	3.47324	3.41775	4.34909	4.11387	2.81593	3.1802	4.337	4.11122	3.71551	-0.757135	3.51482	6.25538e-14	2.45089e-12
Ece1	7.04392	5.77648	4.38223	6.0398	6.86099	8.8229	5.65923	8.15739	4.8979	0.619179	5.00915	6.74581e-14	2.63021e-12
Clptm1l	9.525	19.6303	15.8769	16.7042	10.642	20.4498	7.07151	13.7423	9.47802	-0.603368	5.0988	7.25365e-14	2.78762e-12
Mnat1	7.72009	5.97409	8.9607	7.16235	6.02427	7.31493	7.21622	6.98445	8.99423	-0.651279	4.27666	8.57428e-14	3.26392e-12
Cd19	2.97821	2.46763	2.17415	2.4271	1.25944	1.64202	2.56935	1.61112	1.16819	-0.996785	2.39822	1.03454e-13	3.90115e-12
Ints3	11.74	9.80407	6.68472	9.943	10.2178	9.74777	8.49243	10.6494	9.55423	0.603884	5.47958	1.11502e-13	4.18496e-12
Cd69	238.467	53.7814	10.0349	50.4364	15.9977	111.454	25.0558	122.551	22.5296	0.648756	6.77549	1.14455e-13	4.27582e-12
Rras2	4.92699	13.3909	15.2023	13.8861	10.3459	14.2168	5.2451	9.31439	6.46878	-0.60267	4.65316	1.30915e-13	4.84565e-12
Axin2	5.64227	5.24766	4.5619	4.84821	7.22359	4.44945	4.79728	4.23131	4.75504	0.619853	4.5038	1.32604e-13	4.88566e-12
Lat2	7.87404	7.1262	3.86269	7.07758	6.55162	6.76856	5.9568	6.16861	8.20441	0.807308	3.52106	1.55721e-13	5.68523e-12
Pcbp1	25.0404	20.2441	22.9755	18.3398	15.6615	27.9714	16.0924	24.0761	15.681	-0.591666	5.16056	1.64064e-13	5.96272e-12
Dnajb12	13.0468	13.1917	16.0753	13.1683	11.1813	13.7169	11.8858	12.233	9.64638	-0.627374	4.55821	1.67645e-13	6.06543e-12
Ahcyl1	3.90829	10.1332	7.67171	9.35598	5.18627	11.6374	3.9853	6.24429	4.72426	-0.621391	4.83594	2.13342e-13	7.58214e-12
Ipo4	18.1721	14.1751	6.60646	12.5843	10.2509	22.4165	10.621	23.0554	8.32249	0.603673	5.69767	2.43257e-13	8.60722e-12
Odc1	12.9388	45.0372	14.139	37.1358	9.61761	56.4161	5.62438	37.2377	7.42598	-0.597111	6.0565	3.09503e-13	1.08556e-11
Ube2q1	8.16104	13.7735	12.4402	11.5979	8.45993	11.7935	6.4209	8.4274	7.16498	-0.586591	4.98248	3.26732e-13	1.13607e-11
Coq7	9.00542	4.00028	3.46149	4.61453	6.48623	5.21158	5.73625	6.22758	8.23853	1.01967	2.4014	3.29267e-13	1.13994e-11
Mapkapk2	5.69274	15.0604	9.37412	11.7853	6.17197	17.0629	6.31061	12.1155	5.62105	-0.618896	4.74683	3.35743e-13	1.15738e-11
Ankib1	4.26204	6.69907	5.93072	6.47102	4.07317	5.43159	2.55851	4.43865	3.23366	-0.593097	5.05558	3.88271e-13	1.33273e-11
Sntb2	3.97383	6.12789	7.72171	5.28631	5.24842	4.8021	2.96742	3.18978	3.03666	-0.592089	4.45674	4.818e-13	1.63283e-11
Camsap2	1.44584	3.86903	4.86031	4.66026	3.38047	4.11544	2.20265	2.80221	2.08911	-0.595101	4.78071	5.45959e-13	1.8425e-11
Cpox	3.04788	6.20513	7.45314	6.19893	5.02322	6.1122	3.11548	3.83775	2.81608	-0.623785	4.04592	5.62852e-13	1.89156e-11
Ypel1	2.60852	3.92766	9.82314	5.07305	6.73634	3.77335	5.3789	3.51122	4.51433	-0.616746	3.85704	5.74271e-13	1.92189e-11
Olfr613	2.83086	5.03198	7.70037	5.01699	5.5157	3.63747	11.4948	4.95436	6.31903	-0.61477	5.0394	6.02774e-13	2.00891e-11
Bcl3	3.83943	10.0563	2.09417	9.77113	1.0535	11.7483	0.682226	8.47884	0.767684	-1.02386	3.373	6.26864e-13	2.06507e-11
Gpr34	5.7047	4.99183	2.99129	3.94938	5.04843	4.13866	3.33221	5.36537	6.04462	0.833311	3.19065	6.27337e-13	2.06507e-11
Tmed7	4.13201	4.94026	5.23726	4.46695	3.38821	4.14627	3.05516	3.21941	3.12778	-0.63428	3.84118	7.43788e-13	2.43841e-11
Dusp6	23.5107	2.2264	1.01494	2.24832	1.98221	8.93395	2.97684	8.45911	2.23675	0.9008	3.94105	7.62933e-13	2.49101e-11
Enkd1	2.35984	5.97426	1.53778	5.76947	3.11246	5.16832	2.13296	4.94738	2.18055	1.12569	2.33141	7.67885e-13	2.49702e-11
Arrdc2	3.80053	8.61397	8.83303	7.63118	5.8347	7.85119	3.39838	5.27548	3.18959	-0.624847	3.91034	7.80642e-13	2.52827e-11
Clcn6	3.13288	5.66157	3.34	4.62259	5.54756	5.09907	4.61719	4.94723	3.8327	0.631446	3.81464	8.10663e-13	2.61496e-11
Snx18	2.07649	3.11161	2.97126	3.61223	1.84874	3.21955	1.22452	1.97233	1.77215	-0.677125	3.50697	8.89352e-13	2.83463e-11
Ppp2r2d	3.57889	6.71333	6.86993	5.57282	4.4805	6.28541	5.06567	4.94499	5.60967	-0.672018	3.57761	9.01496e-13	2.86198e-11
H2-Ab1	63.036	37.6408	9.70985	38.329	15.7262	37.3731	17.7003	37.3262	17.8132	0.612491	5.20134	9.4285e-13	2.96979e-11
Cbx2	1.68051	3.83992	2.04301	4.43799	3.38942	3.86744	2.84469	3.04558	3.55814	0.683422	3.67991	9.73242e-13	3.05355e-11
Mxi1	1.57009	5.22539	4.84223	4.96761	3.30256	4.21678	1.84705	3.47712	2.5683	-0.608416	4.29061	1.09796e-12	3.40493e-11
H2-DMa	22.3409	14.1983	8.66094	13.3575	13.5296	12.3559	17.29	13.6882	15.0295	0.656043	4.62503	1.18074e-12	3.63359e-11
Ubxn2a	10.6885	14.354	13.6421	14.2905	9.45908	18.7349	7.57124	18.289	7.2356	-0.587448	5.06285	1.18836e-12	3.64308e-11
Rbm26	3.68401	4.3865	4.78855	4.47759	3.22691	6.25011	3.58238	6.09307	3.62789	-0.632199	4.26992	1.26561e-12	3.86518e-11
Ehhadh	6.03761	6.53081	4.55298	6.46402	7.10116	5.86655	7.13362	6.39609	6.67327	0.648386	4.31556	1.32792e-12	4.0401e-11
Fbxo11	4.0448	5.1137	6.72182	4.89499	4.56971	5.7264	4.83493	6.08679	5.1238	-0.588596	4.47583	1.73792e-12	5.20856e-11
Mlkl	4.93833	3.27136	2.6858	3.10551	4.68816	2.55523	3.00957	2.94244	3.48468	0.833477	2.57647	2.00049e-12	5.90952e-11
Cmtr2	5.64365	5.23603	3.95101	3.27663	6.25355	6.12778	5.75813	6.00639	5.87888	0.618131	4.32188	2.00123e-12	5.90952e-11
Fosl2	5.09755	3.39377	1.08165	3.02947	1.82385	4.9003	2.06282	5.14616	1.28574	0.685343	4.20291	2.02575e-12	5.93827e-11
Egr2	2.42214	2.17887	1.88776	1.88125	1.1586	70.2519	15.236	66.8314	10.2619	-0.902881	5.9189	2.06779e-12	6.03946e-11
Dnajb5	4.38394	9.34016	3.3719	8.32371	5.64229	10.399	5.91668	9.44929	4.92316	0.683467	4.05825	2.13627e-12	6.21685e-11
Atf7	5.88043	4.8851	3.00482	5.10624	4.95541	4.31632	4.36908	5.30285	3.55499	0.649469	3.77058	2.74489e-12	7.87391e-11
Zfp54	7.91372	7.62817	3.59589	6.67926	5.82095	5.89115	5.87373	6.51156	6.87977	0.681829	4.04791	2.87791e-12	8.13923e-11
Txndc16	4.04932	4.09417	3.55787	3.99292	5.49721	3.0557	5.10086	3.26869	4.364	0.625993	4.12471	3.04806e-12	8.59018e-11
Lrrc8d	3.81091	4.74453	4.72908	5.36828	3.20573	6.06613	4.5178	6.5081	3.51862	-0.62651	4.29018	3.08262e-12	8.63764e-11
Wsb2	6.14136	9.05151	10.2169	7.18457	7.00242	10.4012	4.92739	9.6191	5.65811	-0.594241	4.30968	3.08641e-12	8.63764e-11
Fbxw8	2.2069	4.90676	4.98739	5.04325	3.41396	5.96316	2.19811	3.75114	2.33425	-0.6009	4.35321	3.56784e-12	9.9503e-11
Nqo2	8.93234	5.48161	3.00044	4.61146	4.76132	4.29636	4.77073	3.50373	4.38708	0.626792	4.29335	3.65124e-12	1.01477e-10
Nfxl1	4.2606	7.47467	4.28915	7.94257	6.65721	7.52402	4.53773	6.91911	4.45876	0.598255	4.54259	4.27315e-12	1.17945e-10
Taf6l	5.10919	5.91671	3.98531	6.44936	6.34922	7.19393	4.10766	6.55395	5.34019	0.674713	3.82104	5.43922e-12	1.49105e-10
Ubtd1	5.63686	4.60025	3.4708	5.02772	5.92222	5.07265	4.29579	5.37846	4.36584	0.761774	2.96415	5.50116e-12	1.50084e-10
Fcer1g	47.6739	9.1124	1.5762	11.1017	3.56462	12.2453	3.03353	11.9343	3.11778	1.39908	2.80922	6.90365e-12	1.8422e-10
Ppm1d	2.85468	6.94832	6.62915	6.49731	4.42218	6.70258	2.35453	3.66726	3.20745	-0.605395	3.88583	7.45551e-12	1.98287e-10
Slc15a4	3.3907	5.57994	5.76696	4.31123	3.82796	4.70315	1.92809	3.13677	2.19267	-0.632257	3.46937	7.56309e-12	2.00484e-10
Havcr2	1.6593	2.00822	0.590098	2.3848	1.21357	12.5048	1.3467	13.6363	1.34326	1.1656	3.55221	8.14163e-12	2.13705e-10
Dapk3	2.94561	4.21671	4.94181	3.58912	3.16558	3.98767	3.31135	3.96064	3.93173	-0.749419	2.79841	9.71789e-12	2.52602e-10
Nmt2	4.61489	6.71342	2.64763	5.79812	4.51449	6.97543	3.97399	7.45322	5.09817	0.764582	3.39143	9.79166e-12	2.53699e-10
Cdk2ap1	9.2314	7.39071	9.46296	5.78655	6.12229	7.01892	5.66245	6.58931	6.30691	-0.656772	3.19485	1.08807e-11	2.81008e-10
Rassf3	1.37948	4.17894	3.88036	4.04723	2.61385	3.49362	1.78249	2.62293	1.33645	-0.661537	3.38054	1.24872e-11	3.18403e-10
Bod1	3.18579	6.17679	7.55807	5.98102	4.89384	7.41867	3.99388	4.08859	3.66323	-0.679185	2.9721	1.42235e-11	3.58128e-10
Ddit4	23.4441	5.37639	2.81131	5.35033	4.97716	8.18122	6.81264	8.01898	8.41552	0.656671	3.73895	1.65611e-11	4.10553e-10
Palb2	2.53018	3.62054	2.1454	4.17392	3.51842	3.22789	3.63543	3.577	2.48559	0.631	3.67596	1.94194e-11	4.74092e-10
Slc15a2	2.55986	3.48744	4.46081	3.95832	3.00711	3.5597	2.48348	3.70334	3.50523	-0.596524	3.85531	2.56625e-11	6.20848e-10
Podnl1	7.66601	2.28971	4.65224	2.41842	3.00348	2.76044	3.51367	2.17076	3.81269	-0.717085	2.92055	3.16576e-11	7.54521e-10
Ap1s3	1.98928	3.75835	5.45735	3.12616	3.93796	2.72262	8.09957	2.90155	4.69152	-0.668197	3.67899	3.65315e-11	8.57956e-10
Adipor2	2.82869	3.87113	4.07287	3.45709	2.7395	5.13554	2.58671	4.05816	1.784	-0.597394	3.82211	3.76474e-11	8.75368e-10
Ficd	5.7905	5.90132	3.93211	5.779	6.07795	5.57843	5.68607	4.90275	5.63703	0.589294	4.17926	4.88031e-11	1.09493e-09
Smco4	3.01198	3.97289	7.73869	5.27526	4.56179	6.10766	7.54944	5.788	3.93897	-0.686332	2.44909	7.78145e-11	1.67562e-09
Plod1	5.31643	3.76495	2.93118	2.821	4.59144	2.78971	3.15081	3.70699	3.77632	0.591375	3.61772	9.1259e-11	1.94389e-09
Ifi30	12.6592	7.6871	7.69987	7.2436	11.9919	9.4969	13.5452	7.65536	16.1707	0.691495	3.42089	1.10816e-10	2.32396e-09
Lmna	17.1991	11.3135	0.67748	12.331	1.26119	10.0538	1.31947	10.5342	0.759744	1.00128	4.4799	1.11991e-10	2.34248e-09
Tlr12	4.18775	3.30866	2.14043	3.5768	3.52477	2.41239	3.3523	2.90013	3.98508	0.619534	3.43734	1.22677e-10	2.54611e-09
Tyrobp	53.7383	10.5783	2.28307	12.2939	4.73759	10.8863	2.93394	10.9063	9.04228	1.1652	2.78438	1.70369e-10	3.49084e-09
Cdk20	4.11426	2.74211	4.94224	2.42731	7.79723	2.70185	7.96722	2.24575	2.96631	0.588995	3.0371	1.77819e-10	3.61581e-09
Mgat4b	1.40555	5.51177	3.87853	5.65475	2.59155	4.28657	2.41669	3.26652	2.35875	-0.689429	3.181	1.8877e-10	3.80955e-09
Zfp41	1.99641	3.91257	2.33416	4.36459	3.62997	4.2443	3.7957	3.6584	3.27914	0.599522	3.79155	3.75929e-10	7.25832e-09
Adat3	9.931	8.19038	6.36488	9.83964	9.99655	8.20034	7.94183	9.41277	8.80812	0.587729	3.6869	3.86222e-10	7.43918e-09
Tnfsf9	12.1373	8.49087	8.90628	9.001	6.0206	19.2533	7.57035	18.4668	6.43777	-0.620889	3.77448	3.89299e-10	7.4805e-09
Mrs2	1.30466	5.77709	4.21154	4.61577	2.7487	5.1516	1.61267	2.90686	1.51671	-0.65601	2.94845	4.30273e-10	8.22846e-09
Cdkn1a	7.72332	10.8258	1.24904	10.3662	2.24722	27.3441	4.75722	28.0428	3.16477	0.883704	4.44174	7.21315e-10	1.33493e-08
Yrdc	5.00591	8.02092	7.44961	5.70418	5.15125	9.45501	2.32889	6.18323	3.54857	-0.609376	3.26903	8.04329e-10	1.47497e-08
Lace1	4.3636	4.47892	2.41966	3.54646	3.80883	4.54706	3.71752	4.17223	3.16007	0.679508	3.31466	1.08165e-09	1.93492e-08
Shmt1	6.63278	2.78868	3.15433	3.0334	4.88847	18.0531	3.84392	17.9195	5.48479	0.69257	3.97164	1.31714e-09	2.34054e-08
Dcxr	6.6233	3.97694	9.26498	3.51262	6.36275	4.11034	6.74499	4.55401	6.70557	-0.670493	2.47911	1.46401e-09	2.57872e-08
Rnf141	7.82025	5.67944	7.89685	5.47676	5.36613	3.84665	6.40422	4.20907	6.73185	-0.690796	2.57718	1.78067e-09	3.06552e-08
Clec2d	3.3041	2.86479	4.18436	3.28995	2.41724	3.05228	3.3663	3.20045	4.81022	-0.772634	2.11088	1.78237e-09	3.06552e-08
Mlycd	2.81989	5.96197	5.45408	3.79941	3.63799	3.96404	1.60033	2.86455	1.96635	-0.587009	2.98106	1.79622e-09	3.08275e-08
Lst1	12.0889	5.89631	3.23965	6.87859	6.37917	3.84374	5.6075	6.0815	7.58343	1.16299	1.44922	2.00612e-09	3.39224e-08
Mipol1	5.66559	3.32991	7.08123	2.79881	4.94767	2.72948	6.29288	3.72645	5.97016	-0.627403	2.86051	2.27032e-09	3.7911e-08
H2-DMb2	7.00165	3.36815	3.21117	6.32275	1.85451	3.28513	3.86557	3.17044	1.79533	-1.04666	1.64483	2.53926e-09	4.18795e-08
Slco4a1	4.75992	2.14653	2.56581	2.88286	1.7761	7.58143	4.07245	8.21338	2.26829	-0.683053	3.69353	2.68591e-09	4.4117e-08
Nfe2	1.14507	3.72691	0.848296	4.29174	1.5673	3.98115	2.57765	4.20555	2.49431	1.18205	2.3192	3.18753e-09	5.19315e-08
Pole2	7.63225	4.69725	4.15072	5.31282	6.24694	3.67465	7.25472	3.93042	6.0473	0.682559	3.25414	3.73945e-09	5.97122e-08
Evi5l	3.91013	5.25082	2.77615	5.07902	4.55685	4.46265	3.47118	5.78147	3.16812	0.690015	2.7935	3.87581e-09	6.15227e-08
Tmsb15b1	12.4732	13.5474	7.15319	9.56024	11.798	10.2371	10.6987	11.0781	12.8702	0.835013	2.34527	4.20225e-09	6.64418e-08
Prkaca	2.20816	4.77159	3.71705	3.92266	2.45194	3.70354	2.52199	2.75865	3.05944	-0.621315	2.98449	4.31935e-09	6.77598e-08
Gem	18.5894	2.02271	0.511698	2.42638	1.09792	5.40922	2.17557	5.97562	1.59089	1.03996	3.18566	5.63876e-09	8.65976e-08
Frat2	2.93354	5.16193	4.52958	4.59776	3.0928	3.90941	1.89446	2.36646	1.88865	-0.5928	2.94632	6.73804e-09	1.01538e-07
Nek6	3.17945	5.40652	2.33622	5.22843	3.5248	9.67041	2.46432	11.0347	3.27949	0.611814	4.07782	7.20141e-09	1.07713e-07
Ctsh	7.7136	2.14006	0.296908	2.30366	0.789473	1.66574	0.583698	2.84652	1.73791	1.45168	1.82746	1.45945e-08	2.05295e-07
Napsa	6.73112	2.60729	2.1137	2.92206	3.39716	4.91172	5.06299	4.87793	4.76649	0.82115	2.65718	1.51424e-08	2.11889e-07
Tmem45b	1.36228	1.99536	3.19075	2.0316	2.16291	1.71007	3.57086	1.76727	2.68904	-0.774486	1.94902	1.5459e-08	2.15568e-07
Prrt1	3.57091	4.66312	5.27588	2.38062	3.33678	3.71057	2.11684	3.29727	2.32965	-0.737058	1.73455	1.67636e-08	2.31349e-07
Smim19	3.32356	4.95844	5.08618	4.05084	3.52519	4.30897	2.82599	4.48424	3.0578	-0.639585	2.61847	1.70137e-08	2.34399e-07
Csf1	6.40009	3.59857	1.12019	4.49618	1.80334	7.48533	1.35299	7.43135	1.88434	0.58563	4.08255	2.11614e-08	2.84228e-07
Pmm1	6.04254	6.93834	6.04385	6.04237	8.77078	7.07948	6.80226	6.55246	6.40039	0.623942	3.21108	2.17907e-08	2.92191e-07
Snx9	2.2925	5.63907	3.0055	5.17192	2.04468	10.587	1.71782	7.75868	2.41792	-0.645768	3.29466	4.89412e-08	6.11346e-07
Scrn2	7.37567	3.32422	3.93881	3.40669	5.91494	3.19752	4.38843	4.28986	6.14097	0.629609	2.87036	5.18131e-08	6.44215e-07
Trf	63.2752	5.00119	0.358481	7.4862	0.735096	5.3775	0.325159	4.90955	0.110533	1.27763	4.20834	5.95699e-08	7.22757e-07
Serpina3f	7.82325	1.42007	0.353581	1.89891	0.750059	3.24317	0.751389	4.11064	1.51695	1.28124	2.38088	7.53324e-08	9.01744e-07
Myb	0.899689	5.59424	0.483778	5.0995	0.870361	8.87186	2.31275	6.91	2.55876	0.819387	3.91292	9.26387e-08	1.08308e-06
Tcp11	3.48289	5.44518	2.70798	4.71107	1.83806	3.37995	1.6799	4.41757	1.15988	-0.65081	2.73883	1.07861e-07	1.24833e-06
Isg15	43.1502	6.98369	2.92073	6.67972	5.10783	8.31185	3.6875	9.78758	4.23413	0.693348	2.7952	2.143e-07	2.28283e-06
Timp2	0.765729	3.93605	0.804333	3.66091	0.475188	3.0834	0.866232	1.86114	0.693867	-0.835545	2.78214	2.2027e-07	2.33713e-06
Blvrb	16.4355	4.17642	4.54925	4.52158	3.0642	3.63287	2.96864	3.37406	2.83896	-0.738818	2.08693	3.79503e-07	3.81021e-06
Hist1h2bc	8.33001	3.20843	1.84538	2.94534	3.36142	3.01711	3.20573	2.93094	3.04766	0.889187	1.39638	5.88037e-07	5.68365e-06
Snrnp35	3.70457	3.57924	1.98281	3.3381	3.42409	4.93535	2.60425	5.82259	3.58435	0.656086	2.07672	6.38355e-07	6.09663e-06
Ly96	5.36903	6.2517	9.47245	7.4226	6.84861	4.58752	5.38477	5.94327	5.12171	-0.615324	2.02754	6.95503e-07	6.57984e-06
Gadd45g	23.7727	4.85586	1.82461	2.99816	3.01665	5.66395	2.65019	7.11195	2.19178	0.82445	2.5939	8.88618e-07	8.26086e-06
Siah1b	1.60347	4.09704	2.15142	3.87644	3.28	4.30572	2.83946	4.16053	1.81908	0.638784	2.5152	9.82362e-07	9.02784e-06
Rarres2	6.93516	3.40445	8.35075	3.70759	6.04973	3.74011	8.01991	4.3622	6.03839	-0.607192	2.07454	1.02136e-06	9.32221e-06
H2-Oa	7.58003	4.52439	2.18886	3.66589	3.52554	3.29683	5.17419	3.74636	4.3243	0.783067	2.17586	1.10761e-06	9.99588e-06
Lyz2	28.1603	17.0819	2.05025	15.0229	1.28022	19.6011	7.66378	13.7402	11.8431	-0.985442	3.80007	2.32055e-06	1.94762e-05
Nubpl	4.3142	3.54167	2.59126	2.94069	3.95086	2.9569	3.93977	4.30846	4.43932	0.648523	2.19846	3.21005e-06	2.60435e-05
Gzmm	62.9583	8.06933	2.08652	8.23919	3.18375	10.9115	1.87247	10.4245	1.9396	0.694164	3.7651	3.48711e-06	2.79526e-05
Nr4a2	3.29689	2.58405	0.946492	2.85225	0.699774	14.3981	0.887	13.8532	1.29409	-0.64219	3.90785	6.58054e-05	0.000386932
Cenpw	4.46631	6.56489	1.44279	6.34495	2.18071	5.49619	2.70624	4.98358	3.09735	0.621662	2.70131	7.72991e-05	0.000448779
Ccdc28b	2.51105	6.61752	2.14357	5.34414	3.36031	4.88167	3.57925	3.93034	5.09383	0.664581	1.91013	7.92997e-05	0.000458887
Spata24	2.25996	3.90808	1.75683	3.35886	2.77897	3.18222	3.2102	4.39182	2.36785	0.616948	1.2089	0.000728446	0.0032252
Bcat1	0.0924635	0.0932087	0.215552	0.04712	0.160901	5.02349	0.653994	4.34727	0.476853	-0.687218	3.37254	0.000928138	0.00396321
C1qb	95.9668	4.32939	0.141986	5.29704	0.380392	6.12902	0.0897355	6.09582	0.439838	1.57733	3.46192	0.00142332	0.00568479
G0s2	7.7245	2.63059	2.62516	2.86816	3.44419	2.49296	2.5825	1.66458	2.91845	0.588941	1.43569	0.00251838	0.00925325
Ccl1	0.544546	0.741537	1.22438	2.39232	0.719623	250.837	38.5791	224.559	22.8869	-0.981446	4.997	0.00645557	0.020807
Utf1	1.74541	1.94623	0.355882	0.882935	0.609623	16.0729	1.56064	13.1896	1.5378	0.712864	2.36542	0.0123737	0.0361403
Egr3	0.0610119	0.295733	0.179848	1.41049	0.344149	6.64101	1.42766	5.23161	0.93131	0.888182	1.52756	0.0124653	0.0363285
Clec4n	14.67	1.83321	0.0528469	2.37953	0.149069	2.53806	0.0986682	1.97096	0.445209	1.70961	1.5695	0.0153966	0.0431652
