# Supplementary material for: Thymic stromal lymphopoietin limits primary and recall CD8+ T-cell anti-viral responses
Source: eLife. 2021 Jan 13;10:e61912. doi: 10.7554/eLife.61912 (PMC7806261; doi:10.7554/eLife.61912)
Supplement: Supplementary file 2. — Related to Figure 3B. [file elife-61912-supp2.xlsx]

## Sheet: naïve TCR+TSLP 4h
rownames.diffexp.	media.0h	media.4h	media.24h	TCR.TSLP.4h	TCR.TSLP.24h	media.TSLP.4h	media.TSLP.24h	TCR.media.4h	TCR.media.24h	logFC	logCPM	PValue	FDR
Bcl6	4.21675	5.93532	6.14695	10.1133	1.82732	4.36853	5.63018	77.1446	2.59457	-2.93351	5.46181	0	0
Lif	0.141368	0.0790731	0.274122	59.4971	12.4539	0.258016	0.0761892	12.5157	9.88487	2.29223	5.42809	0	0
Cish	2.62549	1.90454	1.21431	116.944	59.988	4.33287	1.20832	36.9629	65.8387	1.64648	6.12158	0	0
Lars2	159.703	223.952	1402.03	405.823	447.728	465.75	203.658	876.84	163.614	-1.15007	10.9656	0	0
Itk	197.688	249.349	182.506	519.059	239.544	246.362	199.267	287.378	229.565	0.844154	10.184	4.12647e-295	7.01087e-292
Gp49a	1.18878	1.53931	0.872462	84.006	11.7398	3.05431	0.465125	32.7263	6.95732	1.39545	4.35964	2.57692e-268	3.64849e-265
Lilrb4	1.00176	1.54822	0.626689	92.0494	13.8548	2.61338	0.617448	38.5559	9.49905	1.28196	4.65203	1.40452e-259	1.70448e-256
Bcl2	32.235	5.08755	8.3815	36.0171	29.7086	32.5276	35.2649	18.5245	23.0443	0.96451	7.52437	3.89964e-227	4.14093e-224
Atf3	0.219242	0.922489	0.514846	311.312	22.014	1.8486	0.116727	175.736	19.122	0.825067	6.86225	9.78664e-227	9.2375e-224
Tnnt3	2.97208	5.49562	4.44743	3.10827	0.533364	7.25224	3.05803	25.0736	0.581542	-2.77234	2.66955	9.2956e-202	7.89661e-199
Ccnd2	89.6403	25.5244	32.0876	403.728	269.35	36.4586	41.1966	249.421	260.313	0.68775	9.82848	1.45606e-197	1.12448e-194
Malt1	46.4072	18.6602	20.0774	185.482	52.8975	21.499	20.005	114.447	45.0921	0.691512	8.21589	1.82138e-177	1.28939e-174
Nek6	0.11463	0.0577109	0.0131607	7.50532	13.8508	0.0247462	0.0722493	1.46326	11.17	2.36117	3.63311	2.34008e-159	1.52915e-156
Cd97	165.129	321.613	208.784	199.187	93.1298	294.351	222.169	128.304	77.8442	0.618585	9.36019	3.25581e-138	1.97558e-135
Bhlhe40	1.36396	1.51759	0.626891	52.5837	28.5106	1.90702	0.367331	31.7348	29.5311	0.749143	5.6787	8.66744e-110	4.90866e-107
Dopey2	9.65994	19.7661	13.6459	25.4225	5.31635	15.9722	14.1426	39.0731	5.97306	-0.630871	6.98252	4.12794e-107	2.06276e-104
Plscr1	0.448186	0.510172	0.258735	8.04485	28.6086	0.418741	0.355279	1.86837	27.8231	2.17293	4.06194	6.18887e-104	2.9208e-101
Adora2a	5.38935	8.20374	9.14496	30.029	8.85326	6.06585	11.6859	49.7902	12.0123	-0.737748	5.35142	2.86313e-95	1.28012e-92
D16Ertd472e	21.6195	11.0559	12.9581	38.6916	29.0443	13.0758	13.8995	25.1945	24.6853	0.617862	7.068	3.86137e-95	1.64012e-92
Pou2af1	6.20777	2.38658	4.80451	65.4843	24.0366	2.1983	4.17892	99.0389	25.9845	-0.588804	6.07024	2.37479e-93	9.60658e-91
Gzmb	3.46936	1.53608	0.171976	14.4641	411.846	0.904856	0.212778	4.37998	313.835	1.76583	6.86935	3.58736e-92	1.38521e-89
Plec	25.2123	41.5316	29.2557	12.3558	8.96168	29.0834	34.2074	18.27	12.0817	-0.597258	8.59543	4.56973e-92	1.68782e-89
Gpr18	35.2496	36.0535	35.082	110.208	45.2275	31.887	40.5669	68.2609	40.1764	0.69279	6.05794	1.52e-91	5.38017e-89
Tnfsf8	14.1398	3.45083	7.62569	55.7039	91.1333	8.26387	12.2441	34.404	74.5198	0.722593	6.23456	1.49003e-86	5.06313e-84
D8Ertd82e	12.2007	1.73422	3.61147	22.2394	3.09953	1.3405	4.25978	14.1266	3.66434	0.654118	5.17078	4.04662e-69	1.27319e-66
Btg3	9.78977	6.337	7.48449	91.4097	24.5778	7.831	7.83899	60.3216	19.9993	0.620471	5.19933	2.91849e-66	8.54916e-64
Aim1	11.7822	5.29957	3.46446	9.46333	3.89073	7.92758	3.50371	5.73259	3.38067	0.708665	5.55128	7.44982e-62	2.10954e-59
Frmd4b	2.82488	0.342185	0.646226	17.7567	0.426668	0.36304	0.386448	11.3238	0.357814	0.647671	4.26018	1.18007e-60	3.13272e-58
Fam71b	8.26397	9.70682	15.4018	12.0482	30.3704	10.3797	16.4612	5.55755	25.7511	1.14548	5.08791	1.33078e-59	3.22999e-57
Ifng	0.99118	0.364148	0.0632969	52.1924	96.8739	0.42418	0.0564141	31.0435	76.4627	0.69292	5.12088	1.04583e-58	2.33798e-56
Srxn1	0.205934	0.0935303	0.0660192	10.4268	2.42771	0.197964	0.0725221	17.9298	3.11255	-0.765862	3.43161	2.04908e-55	4.35174e-53
AI987944	11.8972	5.95826	5.34232	17.4839	7.22195	7.99453	4.79871	10.4547	5.56752	0.774467	4.68756	5.67911e-53	1.07209e-50
Rgs1	8.39504	4.54389	1.75963	45.5125	156.708	6.67452	1.57682	28.2814	131.217	0.732656	5.83252	5.94794e-53	1.09843e-50
Wnt10b	0.0612239	0.146561	0.0387794	10.8796	10.9081	0.17215	0.0192988	19.1676	13.8204	-0.801605	3.79423	2.00551e-52	3.54933e-50
Tpm1	23.9223	19.5851	26.5326	15.2332	24.0252	20.6249	26.2703	27.0805	24.6934	-0.729376	5.36865	4.84561e-52	8.2327e-50
Samsn1	13.9707	7.47154	6.56159	44.7693	32.819	9.13452	6.64094	30.1771	27.7641	0.601952	5.22622	1.21146e-46	1.74429e-44
Il12rb2	4.07744	4.31327	1.17803	18.1622	28.4449	4.18771	1.10659	11.4773	24.6095	0.637574	5.02036	1.26896e-42	1.60892e-40
Ksr1	2.82392	3.43877	2.68365	5.63187	6.3311	2.41299	3.13353	9.40789	7.63183	-0.751194	4.35314	8.61662e-42	1.0658e-39
Klf9	0.880851	1.27999	1.70441	18.3783	5.11047	1.52893	1.7073	12.0661	4.68357	0.638461	4.11606	8.6569e-42	1.0658e-39
Dhx34	4.70185	6.57275	6.31336	8.20547	6.56462	4.41761	7.33475	12.4881	8.70509	-0.641617	5.02702	4.83561e-40	5.6272e-38
Mylpf	6.91925	3.45224	8.80196	3.68799	4.95421	4.13169	9.06002	11.8452	5.13272	-1.4493	2.35333	7.00688e-35	6.92133e-33
Ier3	2.3056	7.39485	12.4558	8.16762	2.7794	8.69979	12.6716	2.97768	2.82467	1.43367	2.94347	4.03265e-33	3.56848e-31
Dusp4	1.21443	0.461787	0.101228	8.25222	11.485	1.17602	0.345527	13.3926	15.6858	-0.679888	3.8459	4.72283e-32	3.89519e-30
Gadd45g	2.06664	0.574099	1.42176	20.2539	6.70545	0.516883	0.489512	11.5021	11.2868	0.781107	2.73069	2.65213e-29	1.84671e-27
Slc14a1	18.7698	5.92434	17.3675	9.08232	4.18448	6.42686	19.2777	5.84029	3.55645	0.629427	5.36956	4.47028e-29	3.0874e-27
Slc39a10	5.88586	3.32493	5.47479	7.21004	8.87434	3.85311	5.49583	4.78918	7.57012	0.619616	4.91113	1.01223e-26	5.81007e-25
Pfkm	4.23024	2.37779	6.14014	1.17406	4.61833	2.33526	6.11912	3.03111	5.26501	-1.19839	3.58869	1.09945e-25	5.94892e-24
Scand1	12.4688	26.8875	37.2399	14.7398	4.8537	13.3111	46.5267	23.8994	25.272	-0.86009	4.21149	9.14542e-25	4.73722e-23
Rhoq	1.758	1.36035	1.3218	1.73944	5.04476	1.61163	1.2876	0.716395	4.69924	1.28006	3.24582	5.91285e-23	2.80612e-21
Fam110a	1.88509	2.0777	1.84166	4.75864	1.57252	1.4185	2.30456	7.81911	2.23221	-0.737214	2.51281	4.40366e-18	1.44997e-16
Sap30	3.95818	4.75358	4.19946	16.9783	13.3941	4.95234	4.27755	11.157	14.6966	0.635861	3.41593	2.74772e-17	8.36626e-16
Epcam	0.736313	0.827198	0.520707	3.9989	7.03507	1.16879	0.419741	2.12791	5.8482	0.931053	2.45299	1.38892e-15	3.56462e-14
Abhd8	25.3188	26.2535	49.4854	7.02351	10.0999	15.9396	62.4098	9.98555	16.9706	-0.617523	5.72871	3.20406e-15	8.05282e-14
Tmem38a	1.08867	4.47853	8.46308	0.876104	1.94407	3.80778	7.93448	2.17362	2.2191	-1.25956	3.054	1.35463e-14	3.16141e-13
Cth	0.0524406	0.0561351	0.422688	9.61445	55.6619	0.0531716	0.0491423	6.4902	48.283	0.600763	4.61494	7.1888e-14	1.53826e-12
Bbc3	5.41308	18.3218	23.3976	6.37266	10.4684	12.1935	25.0504	9.02967	16.5001	-0.60183	4.89039	2.07012e-13	4.25803e-12
Igfbp4	45.0541	3.58601	2.55375	3.7986	14.732	8.81118	9.57363	2.14641	17.1179	0.795997	4.68809	1.93028e-12	3.42332e-11
Slco4a1	0.599697	0.672566	0.602523	2.81636	7.78369	0.704063	0.803063	4.30067	9.93725	-0.608134	3.3394	3.37299e-12	5.71928e-11
Irs2	3.03568	9.33886	9.08822	1.85909	1.69527	5.81928	10.3895	2.72948	2.81764	-0.703005	4.49406	3.51738e-11	5.22381e-10
Ampd1	15.0697	0.740809	0.84535	0.397425	0.177819	0.872659	1.01913	1.17542	0.140018	-1.32476	2.39355	5.67452e-11	8.12901e-10
Etohi1	6.88947	3.14282	4.39763	2.88331	3.70889	4.22928	3.66325	1.80257	3.07299	0.681632	3.70784	6.03202e-11	8.6121e-10
Cmss1	3.94009	2.25854	3.66356	11.3904	24.762	2.58924	3.73424	7.86413	26.3809	0.591721	3.55025	2.57578e-10	3.31534e-09
Rhox8	4.45397	1.59708	4.46424	7.91793	1.34205	3.8995	3.13127	5.27686	1.38538	0.717887	2.15757	1.20783e-09	1.42904e-08
Ift172	2.96993	3.6332	5.51541	0.92961	2.31896	3.19616	5.72887	1.46945	2.33677	-0.686175	4.17988	2.36053e-09	2.70617e-08
Myo18a	8.61043	2.13242	4.31234	0.778807	3.18289	1.91621	4.72438	1.19526	3.8546	-0.643632	4.7199	3.89321e-09	4.34597e-08
Chtf18	1.8278	1.559	1.96717	0.33172	6.74469	1.27866	1.84755	0.805314	9.79994	-1.32198	3.26494	5.40266e-09	5.92201e-08
Emc9	14.8177	27.3353	34.5709	8.29584	2.69649	22.0164	37.9577	12.1761	2.79215	-0.606228	3.97166	5.5722e-09	6.0843e-08
Atad5	1.85755	1.04334	0.562214	0.977058	7.89148	1.47975	0.659958	0.589801	7.71396	0.602422	4.25233	1.66305e-08	1.68386e-07
Actn2	7.05921	7.06762	13.2967	1.73701	0.832521	6.66992	11.2332	2.68973	0.951422	-0.622182	4.18914	1.67705e-08	1.69602e-07
Jag2	0.956193	2.57116	7.23344	0.797077	0.417536	1.78399	8.24998	1.34824	0.599423	-0.800888	3.56116	1.73458e-08	1.74588e-07
Ap5b1	2.66576	5.78644	4.51622	1.53701	1.50276	3.16315	5.42902	2.30607	2.46554	-0.701698	3.44728	3.24796e-08	3.1212e-07
Kdelc2	0.769148	1.37198	23.0381	0.773408	2.59563	1.40657	2.14711	1.37483	2.33831	-0.726614	3.8123	5.28017e-08	4.93455e-07
Zbtb32	0.0767044	0.146619	0.0339005	2.3964	44.1506	0.0646137	0.0213075	1.318	49.6249	0.802325	4.30583	8.73952e-08	7.89811e-07
Prr7	3.04038	6.00908	6.7387	2.79915	0.226556	3.27831	8.75009	4.17659	0.818635	-0.776935	2.57834	1.93144e-07	1.6424e-06
Usp35	1.17882	4.16464	3.77026	1.26346	0.664369	4.09055	3.80146	1.83521	0.681023	-0.602038	3.35646	6.55149e-07	5.00044e-06
Snx32	3.44014	6.99002	7.75129	1.38767	1.74619	6.10829	7.60905	2.37177	1.58178	-0.827832	2.95106	9.36392e-07	6.88714e-06
Sit1	28.5977	10.998	14.1748	2.31479	5.07425	8.95682	15.6359	3.74253	5.97012	-0.714074	3.76789	2.15807e-06	1.47251e-05
Cxx1a	5.02745	9.8374	8.70128	2.33264	4.17636	6.38928	9.70346	3.58381	6.57845	-0.750028	3.10957	2.66901e-06	1.78389e-05
Birc5	0.8992	0.810973	5.98875	0.372696	4.87039	0.776569	0.954235	0.720619	5.77309	-0.919438	3.02462	8.30099e-06	4.94509e-05
Klhl3	1.95491	3.74223	6.9455	1.0384	0.600309	2.86329	7.45288	1.67351	0.635293	-0.825908	2.80719	8.45219e-06	5.01406e-05
Klhl36	4.58729	5.30628	5.61217	1.29473	1.70666	3.91178	7.75342	1.97623	2.38245	-0.756196	3.15989	9.44803e-06	5.55824e-05
Psrc1	0.154462	0.252635	0.0637275	0.218356	15.9224	0.241831	0.196455	0.0208886	18.6503	2.93799	2.90173	2.11877e-05	0.000114279
Ccdc34	3.51015	1.76875	1.77946	0.53697	5.06612	2.15206	2.22673	1.00942	6.18872	-0.86801	2.57049	9.8857e-05	0.000440458
Rhbdl1	3.35589	4.38024	7.76422	2.24775	1.34417	3.545	10.4139	3.13299	2.36754	-0.607272	2.85456	0.000104734	0.000462669
Unc93b1	2.91863	2.57792	3.0186	1.23829	4.78788	1.60017	3.61106	1.85028	5.89617	-0.609502	2.91392	0.000109545	0.000480208
BC055324	0.74705	1.72321	1.36075	1.19094	7.47988	1.72569	1.00361	0.728475	7.46279	0.585479	3.01692	0.000117688	0.000511419
Chchd6	1.28418	0.724055	1.84002	1.48264	6.68438	0.750886	1.33177	0.750973	8.12754	0.989813	1.66511	0.000141837	0.000604297
Mvk	3.50249	2.80862	4.58645	0.810636	6.50226	2.11373	4.56535	1.3527	8.59519	-0.779898	2.78695	0.000397009	0.00150832
Rassf7	2.52267	5.56602	3.71105	1.27901	3.69076	5.0661	4.36662	1.93552	4.5747	-0.64582	2.59504	0.000496682	0.00182575
Arl10	1.41872	7.53998	3.96669	1.5301	1.26518	4.79739	5.45813	2.39988	1.52337	-0.734803	1.96869	0.00051852	0.001897
Abhd14b	3.56153	5.41317	6.00458	1.55097	2.3657	4.58531	6.92106	2.27346	2.51622	-0.596626	2.6406	0.000779128	0.00272374
Ncapg	0.450452	0.18285	0.0589773	0.0662308	6.85278	0.26614	0.100588	0.187866	6.85846	-1.49957	2.74831	0.000816696	0.00284104
Snai3	10.2365	9.43248	5.19018	1.87641	2.37571	6.70252	8.77955	2.49389	2.82536	-0.61031	3.26354	0.000874051	0.00301464
Slc25a35	3.46026	3.70359	3.2569	0.69325	1.75868	3.38311	3.66463	1.10044	1.85315	-0.826029	2.3293	0.000976704	0.00331619
Clybl	10.0498	3.40428	8.568	1.50051	3.08261	3.10409	8.66386	2.25054	3.41656	-0.594251	2.68291	0.00143785	0.00463902
Serf1	1.26757	1.28732	2.86727	2.18619	8.26266	1.72817	1.09175	1.17256	8.73247	0.965724	1.06404	0.00171242	0.00541186
Ckb	1.15299	0.304244	1.22059	0.263698	3.23928	0.105625	1.35276	0.562649	5.36587	-1.299	1.35848	0.00185902	0.00580603
Prrt2	1.14966	2.75665	4.64555	0.77737	1.53293	2.98259	5.54017	1.13944	1.70401	-0.589229	2.74319	0.0019331	0.00599331
Socs2	0.272176	0.165081	0.464441	0.438284	4.22395	0.568181	0.226046	0.220471	5.7495	1.06518	1.77862	0.00285878	0.00835983
Rpusd1	1.95637	3.05124	3.7489	0.837117	4.95042	2.02584	3.45559	1.20489	6.99771	-0.683011	2.52375	0.00546289	0.0146951
Erp27	2.42011	2.02244	4.14739	1.69066	0.506131	2.02434	4.00043	1.02768	0.484896	0.624753	1.10245	0.0066462	0.0173775
Ccne2	0.610473	0.6284	0.522669	0.430213	5.0605	1.05261	0.59507	0.249499	5.10609	0.713291	2.42787	0.00835532	0.0211245
Plin2	1.92354	1.0107	1.05621	0.447956	7.69312	0.849297	1.04496	0.723395	7.98695	-0.696975	2.39583	0.00917576	0.0228252
Recql4	0.607612	0.383682	1.22155	0.339164	6.23166	0.17767	0.765542	0.486134	8.35974	-0.638994	3.10254	0.00965628	0.0238044
Bmyc	6.0172	6.54025	8.70802	1.86505	7.49745	4.56246	5.608	2.58673	14.4657	-0.596707	2.51873	0.0113595	0.0273522
Dtl	0.321706	0.305116	0.0228149	0.373093	23.2812	0.213464	0.0940527	0.236805	24.1326	0.631887	4.54588	0.0129493	0.0306674
Nmrk2	0.364189	1.20318	27.9537	0.484712	0.239964	0.781931	2.25721	0.795697	0.257047	-0.635431	2.57916	0.0129834	0.0307226
Enkd1	0.998602	1.65594	1.27906	0.49429	6.82568	1.52338	1.24389	0.794127	9.38487	-0.782948	1.93498	0.0175078	0.0396822
Nuf2	0.621256	0.460514	0.363543	0.450011	5.74808	0.449055	0.384468	0.271981	6.04963	0.708441	2.13208	0.0175078	0.0396822
Rnf32	1.25043	2.64014	7.19694	0.797616	0.170563	2.97743	5.66656	1.24733	0.13028	-0.616839	1.52574	0.0201152	0.0444791

## Sheet: naïve TCR+TSLP 24h
rownames.diffexp.	media.0h	media.4h	media.24h	TCR.TSLP.4h	TCR.TSLP.24h	media.TSLP.4h	media.TSLP.24h	TCR.media.4h	TCR.media.24h	logFC	logCPM	PValue	FDR
Lars2	159.703	223.952	1402.03	405.823	447.728	465.75	203.658	876.84	163.614	1.47019	10.9656	0	0
Jund	58.6125	51.482	26.3053	61.7531	63.7031	47.7829	41.3733	71.6886	116.755	-0.842427	7.47476	8.25085e-231	3.50455e-227
Junb	127.328	60.8721	34.6785	235.214	35.6046	45.8413	40.6558	245.425	68.5513	-0.945399	7.5526	5.0354e-188	1.42586e-184
Scand1	12.4688	26.8875	37.2399	14.7398	4.8537	13.3111	46.5267	23.8994	25.272	-2.35057	4.21149	1.83655e-185	3.90037e-182
Hnrnpa0	78.4252	93.2646	104.27	143.706	84.5317	84.3947	127.586	163.78	131.957	-0.611873	8.29126	1.91877e-127	3.25998e-124
Mif	62.9913	67.5224	83.5547	289.33	439.37	45.4654	96.0977	294.97	674.075	-0.601067	6.99192	3.35608e-122	4.75166e-119
Sell	607.611	583.527	524.329	333.016	86.2682	625.584	531.649	312.804	57.6321	0.6168	9.98538	4.76598e-112	5.78385e-109
Rbm38	75.264	80.5998	89.8783	72.252	55.9046	49.4038	98.6174	80.0428	88.8962	-0.654468	7.15875	2.4864e-107	2.64024e-104
Il7r	241.758	423.267	483.311	141.284	11.7345	486.846	400.439	138.436	6.02633	0.998047	9.81672	1.59042e-106	1.50118e-103
Map1s	9.48273	18.7712	12.8304	15.7008	8.85535	11.0809	15.688	20.9141	16.5807	-0.90441	5.629	1.87505e-104	1.59285e-101
H2afj	15.9729	21.1481	32.6624	26.8436	20.6862	16.3841	34.4459	29.8819	36.8958	-0.816093	5.64032	1.88696e-102	1.45725e-99
Tcf3	18.5504	27.6011	21.8192	10.2065	23.4414	18.5593	27.9407	12.6184	37.7423	-0.672196	6.26444	1.44073e-101	1.01992e-98
Zfpm1	10.3645	5.46556	3.4181	6.50013	16.7191	3.78079	3.96666	8.62446	27.728	-0.710948	5.06437	3.11098e-97	2.03291e-94
Foxp4	13.8799	29.2063	12.972	53.8857	26.3397	20.6217	16.8195	67.8703	40.635	-0.608228	7.01682	2.30477e-95	1.3985e-92
Ssbp4	31.2626	24.8623	23.8375	60.704	15.8059	16.4572	29.0523	78.0008	29.7992	-0.902176	5.71443	1.52402e-90	8.09161e-88
Rnf126	20.4195	24.2168	21.6532	44.5259	29.4079	18.5531	27.8244	47.775	48.0924	-0.684765	5.73367	8.63436e-83	3.86047e-80
Samd9l	89.2288	28.0101	26.2369	27.4019	6.74155	38.6046	22.6233	24.0798	3.8267	0.854881	7.39961	6.193e-78	2.28737e-75
Ier2	62.8471	54.5432	32.2583	309.632	50.7649	42.4764	40.4835	328.332	76.894	-0.587637	7.42338	5.30391e-76	1.87736e-73
Scaf1	19.2219	37.8384	29.263	21.9831	17.711	25.2958	33.194	28.3815	26.8985	-0.592683	6.87288	1.60904e-75	5.46753e-73
Pyhin1	128.829	79.6572	93.2249	42.805	27.8346	94.4846	86.2773	38.0886	18.9303	0.589429	7.99182	3.58746e-75	1.17213e-72
S1pr1	205.575	275.438	259.398	65.7212	9.61586	270.605	258.486	68.7367	5.25817	0.895129	9.01597	2.41607e-72	6.8415e-70
Abhd17a	11.6233	16.1504	20.161	7.56071	17.4674	10.0787	24.6606	8.73343	30.3415	-0.77676	4.66585	7.14796e-71	1.84006e-68
Sf3b5	21.4221	29.1319	28.2179	38.5424	48.8127	20.891	31.0003	38.4499	78.2914	-0.674423	4.82517	1.45344e-64	3.01146e-62
Prr12	12.6021	19.0299	16.4143	4.44013	6.22418	13.0757	22.1381	5.80514	9.64152	-0.616089	6.48135	1.15733e-60	1.9663e-58
Ifi203	130.59	35.89	60.0611	57.5246	15.6466	49.9428	53.2605	44.7448	10.4854	0.605945	7.62371	2.36336e-58	3.58513e-56
Crlf2	9.411	17.3061	16.1454	40.4498	10.5236	11.703	18.0665	48.7489	19.3872	-0.870206	4.90577	2.30868e-57	3.3241e-55
Med25	10.3996	21.9286	16.5441	14.9835	14.7138	13.4464	19.8553	18.0891	23.2324	-0.643533	5.34313	1.15262e-56	1.5542e-54
Pgls	13.7057	26.7546	24.9273	14.6554	22.6642	15.8103	35.792	18.1579	38.7109	-0.751554	4.45832	5.04258e-55	6.39354e-53
Abhd8	25.3188	26.2535	49.4854	7.02351	10.0999	15.9396	62.4098	9.98555	16.9706	-0.750848	5.72871	5.17551e-53	5.86213e-51
Chpf	3.71331	9.26538	6.12691	14.3149	6.61064	5.41984	7.3972	18.6181	10.9572	-0.727832	4.94168	3.5621e-52	3.92988e-50
Socs1	9.21265	25.4533	53.0207	111.776	21.3901	22.4144	60.266	109.261	34.0009	-0.640914	6.10308	1.02978e-51	1.12154e-49
Tpgs1	6.3739	12.8206	9.68075	4.50515	3.97086	7.5863	14.5888	5.36362	9.89292	-1.30256	3.31357	8.90346e-50	9.00416e-48
H2afx	12.7106	16.2786	15.1234	13.0444	17.6631	11.5505	18.029	14.8681	28.572	-0.65792	4.55008	7.97053e-49	7.69428e-47
Hmg20b	13.6466	22.3941	17.7188	10.1045	13.1999	17.8735	20.3963	12.5809	21.4685	-0.682082	4.83978	3.98015e-47	3.59696e-45
Irf2bp1	10.2681	18.0005	17.339	11.893	9.85035	12.6652	20.9595	13.1696	15.5313	-0.623542	5.36019	1.06421e-46	9.41713e-45
Ahdc1	6.69151	10.5502	7.64899	3.20508	4.33154	6.99165	8.77303	4.1168	6.66862	-0.61648	5.52264	1.19143e-45	9.92272e-44
Zfp865	10.8394	16.9411	15.7385	13.3254	5.85978	11.4958	18.3577	18.5701	9.32413	-0.645282	5.80459	8.55546e-45	6.66777e-43
Rnaseh2c	24.1231	26.799	27.0891	17.0889	27.9685	20.6599	34.979	17.5365	45.9316	-0.722616	4.20468	1.22667e-44	9.38786e-43
Pkmyt1	7.75089	20.3879	13.8993	13.1798	11.9787	13.9772	18.8258	14.6285	18.8535	-0.631197	4.9943	3.18581e-44	2.35334e-42
Bcl7c	8.89039	22.1055	13.0503	15.6241	25.3407	19.5749	14.6831	17.1214	39.2673	-0.615945	4.30361	1.73928e-41	1.11091e-39
Klrd1	180.283	145.184	171.065	45.8865	35.363	198.625	141.116	45.7173	22.9986	0.626114	6.67543	3.75913e-41	2.31404e-39
Bbc3	5.41308	18.3218	23.3976	6.37266	10.4684	12.1935	25.0504	9.02967	16.5001	-0.652317	4.89039	1.70466e-40	1.01267e-38
Ccr9	57.8126	22.3997	39.5764	6.60072	2.75303	20.9527	42.4335	7.64714	1.40188	0.998432	6.73519	6.60253e-40	3.71447e-38
Mfsd10	4.06543	6.57911	2.6946	2.97974	7.58465	3.64302	3.86715	2.9376	12.7697	-0.742537	3.35355	2.27488e-39	1.24678e-37
Ifit3	26.8658	5.34491	10.01	12.0771	4.26259	5.82066	7.54641	11.2895	1.92322	1.17826	4.29072	2.59148e-38	1.32618e-36
Yif1b	5.46883	8.81278	7.57722	12.4226	13.8205	6.48401	9.23556	14.4284	22.5498	-0.688939	3.74505	6.96836e-38	3.50274e-36
Pgp	4.52257	8.6192	7.52759	4.29798	9.37758	5.63774	11.8091	5.04311	16.9743	-0.807576	3.19808	2.10028e-37	1.01374e-35
Ccdc85b	2.65171	3.04902	7.19675	1.86002	1.96153	2.159	6.55765	2.20746	3.62204	-0.850352	4.01929	2.5101e-36	1.1164e-34
Josd2	7.61123	10.9761	16.173	10.9728	11.7675	8.25547	18.8509	11.9266	19.6631	-0.749892	3.84549	1.41582e-35	5.95415e-34
Cebpb	1.6439	0.571835	0.905301	15.0812	4.32316	0.627612	1.11702	19.2828	8.51105	-0.940933	3.14777	2.22203e-35	9.03166e-34
Apba3	4.50767	10.8634	11.35	12.9607	7.9398	7.39963	11.258	15.5606	12.5326	-0.658379	4.53081	7.51461e-35	2.96914e-33
Znhit2	5.28614	7.67671	8.3151	3.96865	5.29155	5.56992	10.0926	4.26154	10.2183	-0.927038	3.1925	2.59485e-34	9.84072e-33
Metrn	3.77557	5.87063	6.05023	2.01717	8.0685	3.40391	7.96411	2.20277	13.709	-0.744493	3.12127	2.17381e-33	7.79177e-32
Olfr56	2.70667	1.12102	1.33807	12.6538	10.003	2.80976	1.35219	9.39674	6.16752	0.670789	3.37864	4.17766e-33	1.45448e-31
Ms4a6c	27.234	20.8905	24.7513	18.3747	13.7484	35.352	22.5341	14.0861	9.10187	0.598563	5.33573	6.37075e-33	2.18224e-31
Bmyc	6.0172	6.54025	8.70802	1.86505	7.49745	4.56246	5.608	2.58673	14.4657	-0.931567	2.51873	8.85921e-33	2.98647e-31
Gp49a	1.18878	1.53931	0.872462	84.006	11.7398	3.05431	0.465125	32.7263	6.95732	0.772315	4.35964	3.57764e-32	1.15559e-30
Spata5l1	6.48469	8.663	11.0243	11.1945	5.60462	6.90363	13.2771	13.8871	10.3568	-0.828472	3.76055	4.73067e-31	1.39538e-29
Aldh16a1	4.61371	8.56374	7.48245	4.40253	6.77095	5.87822	8.41968	5.86274	10.3416	-0.609151	4.23578	1.62621e-30	4.69886e-29
Sssca1	7.76901	5.68598	9.09283	18.465	26.8348	4.6783	8.9244	21.1075	40.2274	-0.5974	3.52859	2.90892e-30	8.23709e-29
Zfp628	6.22486	7.79757	7.10105	8.90496	3.97639	5.8036	8.93976	11.4885	6.1703	-0.625787	4.76998	1.39806e-27	3.4128e-26
Zfp771	1.63959	2.69345	3.48886	2.14986	3.66009	1.51596	4.12622	2.68892	7.35672	-0.961927	2.14445	3.59404e-27	8.62468e-26
Tymp	2.59956	1.88273	2.87725	9.33953	5.48713	1.50177	2.93832	8.61607	8.82203	-0.676948	3.36859	4.43405e-27	1.04923e-25
Utf1	0.313749	0.0989775	0.028096	18.0631	6.33307	0.199878	0.028158	20.317	11.1664	-0.796395	2.8805	6.54081e-27	1.53917e-25
Igsf8	3.36241	4.45996	6.59546	1.09326	4.0933	2.51883	6.67908	1.32452	6.81032	-0.717919	3.29927	7.22824e-26	1.58666e-24
Pydc3	125.271	63.7409	103.373	42.4216	5.71175	57.897	99.6212	40.9454	3.78606	0.631604	7.60187	4.13134e-25	8.43648e-24
Phlda3	0.153707	0.162687	0.0470721	0.0568815	9.3089	0.162111	0.20626	0.0712659	14.3421	-0.585875	2.16704	6.14308e-25	1.23079e-23
Zfp943	13.5416	4.52303	5.69619	4.9151	5.83861	10.7788	4.71697	3.30394	3.78066	0.621439	4.17475	1.94503e-24	3.71305e-23
Nfic	6.33096	5.74612	7.81995	2.15345	1.74948	4.14984	9.53844	2.60301	2.75338	-0.633594	5.00557	6.75908e-24	1.23215e-22
Tbcc	3.00486	5.42238	4.6863	4.20249	4.49964	4.17366	6.49655	5.25786	7.44023	-0.70765	3.30461	2.51297e-23	4.30397e-22
Gadd45g	2.06664	0.574099	1.42176	20.2539	6.70545	0.516883	0.489512	11.5021	11.2868	-0.76734	2.73069	3.09958e-23	5.26618e-22
Pcbp4	1.1516	4.61203	1.71344	1.36738	4.46262	3.13616	1.86448	1.65701	7.20491	-0.681084	2.74304	7.90828e-23	1.29944e-21
Zfp579	7.53159	16.1642	15.5575	5.26374	2.95364	12.0063	18.8405	5.49755	5.13913	-0.772677	4.51962	1.24311e-22	2.00004e-21
Ppp1r35	7.24377	13.6546	13.1821	8.33868	6.17658	9.31588	15.1364	9.59813	10.5876	-0.762475	3.37957	6.4339e-20	8.10919e-19
Irs2	3.03568	9.33886	9.08822	1.85909	1.69527	5.81928	10.3895	2.72948	2.81764	-0.698806	4.49406	8.77304e-20	1.09599e-18
Zfp758	8.61121	2.98541	3.52996	3.3012	4.2468	6.76825	2.52631	2.58878	2.73057	0.609056	3.66584	1.5396e-19	1.87646e-18
Il18r1	30.7521	20.5763	26.1563	16.4349	3.412	23.8813	23.1781	15.9646	2.32564	0.588955	6.32769	5.54731e-19	6.53598e-18
Il3ra	2.88832	4.09165	3.47595	4.66353	2.29263	2.30642	3.12329	5.50689	4.41303	-0.955676	2.43598	2.06236e-18	2.28619e-17
Eva1b	5.03082	13.407	10.7889	4.75484	0.799749	9.55674	15.3346	6.28245	2.15243	-1.43236	3.48606	3.62924e-17	3.58493e-16
Dpm3	10.5108	19.1492	22.0123	11.3525	10.1586	10.7077	26.4572	13.4674	17.1125	-0.768368	3.0725	3.98444e-17	3.92211e-16
Pbld1	7.36078	3.46125	5.30189	11.5947	5.67988	7.64337	3.94007	9.91704	3.65616	0.590748	3.70241	7.22268e-17	6.94866e-16
Map3k10	2.65771	5.45735	5.38422	2.72443	2.20586	4.14711	5.89322	2.87123	3.40111	-0.609929	3.92957	8.26719e-17	7.88213e-16
Llgl2	3.86043	8.08498	6.44822	2.98257	1.85189	5.36857	7.88699	4.04649	2.90831	-0.641871	4.22693	1.1199e-15	9.61939e-15
Ckb	1.15299	0.304244	1.22059	0.263698	3.23928	0.105625	1.35276	0.562649	5.36587	-0.723054	1.35848	5.99327e-15	4.78055e-14
Ninj1	3.61026	14.4879	6.5998	10.86	5.18233	10.5746	9.73726	13.3544	8.13984	-0.638339	3.46824	6.00982e-14	4.30105e-13
Ap5b1	2.66576	5.78644	4.51622	1.53701	1.50276	3.16315	5.42902	2.30607	2.46554	-0.692168	3.44728	9.89616e-14	6.91347e-13
Cxx1a	5.02745	9.8374	8.70128	2.33264	4.17636	6.38928	9.70346	3.58381	6.57845	-0.65613	3.10957	2.61762e-13	1.74405e-12
Trp53i13	6.86126	14.8182	18.8119	2.90491	2.73684	9.93397	19.3726	3.61039	4.55274	-0.750194	3.7796	1.06083e-12	6.67046e-12
Bola1	2.63315	5.28012	6.22201	2.57487	7.04325	4.05848	6.71201	2.75495	10.9912	-0.624972	2.0898	3.85911e-12	2.28869e-11
Zfp580	2.70629	5.6624	3.04533	2.61526	2.79666	4.20568	4.54348	3.41845	4.76958	-0.729637	2.17982	4.55265e-11	2.39028e-10
Prr7	3.04038	6.00908	6.7387	2.79915	0.226556	3.27831	8.75009	4.17659	0.818635	-1.86223	2.57834	4.03858e-10	1.89023e-09
Rhbdl1	3.35589	4.38024	7.76422	2.24775	1.34417	3.545	10.4139	3.13299	2.36754	-0.809271	2.85456	2.78793e-09	1.1824e-08
Tnfrsf13b	3.06962	3.96296	3.58339	1.77153	2.66114	3.72561	3.84416	1.67012	4.44021	-0.733677	1.42678	1.78159e-07	6.12986e-07
Rtp4	25.2466	2.88845	2.92425	25.445	1.73196	3.25807	3.09824	22.4679	1.05822	0.774329	3.96467	3.33234e-07	1.09935e-06
Phldb3	4.06931	11.2995	10.672	3.03108	0.805645	8.57143	11.0262	2.98164	1.3129	-0.692083	3.8821	3.01299e-06	8.79867e-06
Lcn4	21.4348	21.9695	14.9642	14.9763	3.33251	23.6783	12.0559	12.6487	2.20323	0.626986	3.52073	3.33704e-05	8.4169e-05
Cnga1	9.56802	6.04021	14.9595	1.82717	0.432348	6.09823	13.4976	1.80225	0.228943	0.972009	4.14829	3.88151e-05	9.68384e-05
Hist2h2aa2	2.52578	6.39256	7.04765	4.22579	0.855234	4.44999	6.88989	4.39389	1.64002	-0.947836	1.6022	0.000301012	0.000661775
Gna15	3.47019	5.80167	4.4476	1.82414	0.346751	5.05962	6.3475	1.74913	0.630137	-0.851889	2.80299	0.000305198	0.00067063
Blvrb	4.63566	2.68737	4.54954	1.76911	1.1198	3.1253	4.69823	1.4811	1.83935	-0.715639	1.38947	0.000548893	0.0011602
Oasl2	10.2405	1.93722	1.89801	10.0114	0.570683	1.74419	2.05589	9.66961	0.384344	0.635699	3.7622	0.000642429	0.00134254
Hspa1a	27.6101	0.0727674	0.0667872	0.220675	0.15895	0.192276	0.0249566	0.201173	0.308282	-0.883302	3.12461	0.0016138	0.00316464
Hspa1b	41.9075	0.137065	0.189123	0.257515	0.371402	0.19882	0.0312877	0.292804	0.58067	-0.59464	3.79464	0.00170018	0.00332405
Prrt1	8.29033	2.92483	3.90701	0.826911	0.313712	1.96346	6.61329	0.932796	0.685884	-1.04322	1.54748	0.00197903	0.00382087

## Sheet: memory TCR+TSLP 4h
rownames.diffexp.	media.0h	media.4h	media.24h	media.TSLP.4h	media.TSLP.24h	TCR.media.4h	TCR.media.24h	TCR.TSLP.4h	TCR.TSLP.24h	logFC	logCPM	PValue	FDR
Ccl6	5.18081	2.66647	2.1752	6.13081	18.6146	1.67014	2.96257	5.43459	16.3066	1.77129	3.41009	5.1753e-48	4.1568e-44
Max	20.9555	25.3242	21.3773	23.971	15.7403	10.6975	19.1672	21.8073	21.9791	1.04919	5.40916	6.36516e-38	2.55625e-34
Cotl1	239.163	263.24	571.797	228.387	283.305	475.472	292.776	256.929	405.34	-0.870018	9.18523	2.11859e-32	5.67218e-29
Glt25d1	4.88722	7.40955	12.3913	7.49952	9.31834	10.4344	5.48241	5.32381	6.4757	-0.994511	4.70087	1.31962e-31	2.28428e-28
Jund	38.2822	32.3955	23.906	27.5872	14.0378	31.2194	8.04237	16.9001	7.35886	-0.905634	6.00658	1.42198e-31	2.28428e-28
Ahcyl1	3.90829	10.1332	7.67171	9.35598	5.18627	11.6374	3.9853	6.24429	4.72426	-0.924684	4.83594	1.13627e-29	1.52108e-26
Tmem165	3.38811	14.6913	11.6657	12.4427	8.18672	13.929	4.42222	7.35601	5.05995	-0.945247	4.19018	3.85259e-27	4.42057e-24
Cish	60.0776	16.3813	9.44254	23.1765	14.092	39.8283	9.25282	70.3604	16.5554	0.811644	5.9358	6.95975e-27	6.98759e-24
Eml2	6.44348	8.75691	4.4602	6.76743	6.41003	3.5927	7.22247	7.10755	7.01232	1.05305	3.96644	1.47383e-26	1.31531e-23
Plk3	2.98972	3.03866	1.30232	2.68667	2.70459	13.2356	2.72652	7.23999	2.54057	-0.897716	3.41615	5.77241e-26	4.6364e-23
Sgpp1	5.52083	10.485	10.1871	9.329	7.7792	9.58304	4.50256	5.25774	5.18545	-0.893521	4.72631	7.3662e-26	5.37867e-23
Nsmce4a	15.755	60.9685	52.6712	58.0081	33.3665	54.8781	18.3107	31.7464	18.5958	-0.804075	5.86654	4.90012e-25	3.27981e-22
Ier5	27.2995	22.3126	21.5303	20.9167	13.8123	30.4691	7.59605	17.9063	8.35034	-0.787616	5.98249	1.28244e-24	7.92353e-22
Ccdc117	11.725	17.6104	11.6075	16.2922	9.94913	17.0468	6.93425	9.92294	4.91673	-0.806316	5.38295	4.41614e-24	2.39585e-21
Bag1	28.0699	100.271	77.3178	89.8176	57.1573	112.738	31.3163	67.0794	30.2181	-0.763206	6.55732	4.47433e-24	2.39585e-21
Cdan1	2.1023	4.9964	3.67324	4.08277	3.4587	4.68987	2.07266	2.60529	1.78553	-0.859216	4.4682	8.92862e-24	4.48217e-21
Lamp1	14.044	34.9442	32.386	26.9148	18.1784	30.1131	10.7537	17.6386	12.6844	-0.785664	5.70947	1.32739e-23	6.02016e-21
Aaed1	23.628	28.3125	44.918	28.1702	34.725	24.0329	20.515	13.3671	23.1652	-0.892243	4.78524	1.34914e-23	6.02016e-21
Mapk1	12.4866	26.2092	23.9072	25.3152	16.3409	25.3663	11.221	15.2967	10.1379	-0.751146	6.64111	3.83184e-23	1.61986e-20
Grb2	16.848	33.065	29.5482	31.1604	21.4346	32.4008	11.385	19.2132	12.4531	-0.763914	5.98465	5.36475e-23	2.15449e-20
Taf10	17.5617	49.9697	43.284	49.5903	25.7026	54.4827	13.4236	31.3029	16.9471	-0.802171	4.74925	1.40187e-22	5.36181e-20
Ppm1d	2.85468	6.94832	6.62915	6.49731	4.42218	6.70258	2.35453	3.66726	3.20745	-0.893254	3.88583	2.12728e-22	7.76649e-20
Sh2b3	3.13547	6.59232	5.31635	5.19792	4.88006	9.03228	2.48575	5.06251	2.76831	-0.872276	3.70121	3.64885e-22	1.27424e-19
Rnf187	17.7643	43.8692	55.32	35.1255	37.0331	34.8219	22.4423	20.7318	22.7237	-0.7531	6.05437	6.03128e-22	2.01847e-19
Ubqln1	9.55813	30.1488	24.8595	30.4437	18.0405	29.2266	8.58954	17.6475	10.3612	-0.733481	6.28442	7.44443e-22	2.35905e-19
Upf1	9.01207	21.7734	18.1094	18.2359	11.9134	21.8909	6.48993	13.3002	7.29475	-0.735624	6.11464	7.63635e-22	2.35905e-19
Ybx1	43.856	113.128	89.4543	106.762	66.4398	121.606	37.6803	74.7791	38.7056	-0.708321	7.47524	1.21829e-21	3.62418e-19
Pnrc1	56.2998	79.742	78.7214	69.0224	45.5513	75.6826	26.6305	46.1447	27.3141	-0.716964	6.80999	1.73228e-21	4.96918e-19
Fyn	43.0276	83.9194	76.8984	78.0747	52.6964	128.03	30.2859	80.0074	32.7191	-0.691671	7.9612	5.04764e-21	1.39802e-18
Pank2	6.49351	16.9953	16.1109	15.1713	11.389	16.085	8.09404	9.81461	7.16966	-0.737341	5.75565	5.72825e-21	1.50254e-18
Zfp36l2	81.1231	80.1503	67.137	68.5148	43.9923	57.9264	25.1242	36.0082	27.3945	-0.700113	7.60685	5.79913e-21	1.50254e-18
Cmas	17.9117	44.8081	46.4324	42.9719	32.2031	39.9296	17.3069	24.3696	16.0662	-0.733468	5.8704	7.49716e-21	1.88179e-18
Tmem160	25.6052	60.1746	59.4373	57.7409	48.6839	69.5344	20.8499	42.4056	26.2418	-0.738543	5.29802	1.82826e-20	4.44987e-18
Klf2	70.9176	91.2412	87.8451	75.2322	54.8963	62.2	28.3359	38.5601	33.3752	-0.704707	6.8211	1.95139e-20	4.55288e-18
Exosc6	2.99668	7.64171	5.21919	6.24981	5.20136	9.86272	2.09897	5.19227	2.43146	-0.934214	2.88093	1.98395e-20	4.55288e-18
Lgmn	17.9887	3.26588	1.03566	3.76817	0.336598	2.00635	1.22335	3.99652	0.442208	1.06253	2.68804	2.07791e-20	4.63604e-18
Chic2	13.0844	37.1781	29.7787	35.6283	23.0424	41.0894	13.2959	24.9774	13.4394	-0.742414	4.92203	5.62577e-20	1.22125e-17
Donson	5.53484	16.7471	15.101	14.8876	11.5619	16.6183	7.15562	9.96351	6.63617	-0.753435	4.84226	6.37862e-20	1.34824e-17
Agfg1	7.67314	13.5085	10.0671	12.0232	7.85365	13.9701	4.15057	8.49046	5.14296	-0.740599	4.92353	7.52234e-20	1.54922e-17
Tprgl	54.0739	187.594	171.075	177.953	137.365	159.302	65.527	100.627	64.1006	-0.670639	7.84491	1.31647e-19	2.64347e-17
Phc3	4.72955	3.68236	3.84922	3.55205	3.66054	2.7838	3.9114	4.49503	3.25873	0.723753	5.44699	1.84645e-19	3.61725e-17
Dirc2	1.86257	4.63032	5.48167	4.55303	3.36334	3.36468	1.46807	1.87742	2.28033	-0.872749	3.96234	2.29944e-19	4.33905e-17
Suds3	5.78217	16.1259	11.0886	13.343	8.76	14	6.14834	8.41703	5.24604	-0.752554	4.66225	2.32295e-19	4.33905e-17
Rnf126	10.935	19.319	15.7882	16.8593	14.1015	23.71	9.87049	14.5143	8.01698	-0.737668	4.66841	4.07339e-19	7.43578e-17
Gfi1	1.53814	2.73206	4.26405	2.92724	2.16833	5.64251	1.79555	3.18147	1.74554	-0.858175	3.13821	4.36018e-19	7.78243e-17
Lysmd2	5.46327	15.3828	23.0305	16.3462	17.1771	16.194	10.685	9.43895	11.6601	-0.812738	4.17325	4.65077e-19	8.12064e-17
Xpa	6.00864	16.9051	14.4145	16.8714	11.7555	15.9088	7.58659	8.95669	6.78493	-0.872847	3.57211	4.79228e-19	8.18969e-17
Rnf11	2.59789	10.7184	7.97707	9.73575	4.97357	9.4261	2.88773	5.48094	3.35786	-0.80649	3.85204	7.23815e-19	1.21118e-16
Dtx1	35.0327	5.13551	5.02363	4.43342	4.12599	7.47804	3.94696	4.47635	2.66661	-0.756064	4.75885	1.46913e-18	2.40817e-16
Mfsd6	4.01143	16.7317	11.3435	17.2231	9.36488	14.3651	4.87223	9.04191	4.65293	-0.68582	5.69155	1.69101e-18	2.70865e-16
Ppp2ca	14.05	30.9609	29.8291	26.7292	19.2162	28.8166	11.1153	17.9203	13.1724	-0.694848	5.4428	1.71988e-18	2.70865e-16
Ccny	1.80455	5.29019	4.31833	5.20994	3.06615	4.93297	1.68226	2.89713	1.88855	-0.794461	3.88631	1.95104e-18	3.0136e-16
Ctbp1	19.4661	41.5166	41.0429	34.5216	27.9149	39.6307	16.9306	25.2231	17.0105	-0.661747	6.25792	4.91307e-18	7.44562e-16
Tnik	4.69458	2.64926	4.32693	2.50208	4.06585	2.1572	4.39029	3.51163	3.89783	0.755125	4.73994	6.83073e-18	1.01601e-15
Otud5	15.6099	44.8504	38.0034	43.6946	25.8249	39.545	13.1008	25.378	13.545	-0.654813	6.24828	1.18254e-17	1.72694e-15
Efhd2	91.6529	111.546	101.892	102.372	92.8953	108.277	52.3852	70.1956	59.8332	-0.631433	7.76663	1.54683e-17	2.2186e-15
Peli1	30.1288	153.704	161.978	142.849	114.659	146.576	64.237	95.7906	57.2508	-0.62485	8.64633	1.5961e-17	2.2491e-15
Ptpra	10.1833	22.7845	24.2991	21.9162	16.4959	17.6007	13.2023	11.1479	12.3445	-0.666508	5.99629	1.82903e-17	2.53289e-15
Btbd11	6.57334	9.97763	12.3911	8.72952	13.7445	6.59855	5.84474	4.14246	6.88878	-0.692932	5.66927	3.92665e-17	5.34557e-15
Mrs2	1.30466	5.77709	4.21154	4.61577	2.7487	5.1516	1.61267	2.90686	1.51671	-0.886239	2.94845	4.24203e-17	5.67866e-15
Snx32	5.64071	7.17752	10.0583	6.98644	9.60807	4.49043	11.5012	7.5945	10.1741	0.83109	3.8486	4.31544e-17	5.68224e-15
Cited2	7.49719	12.9575	15.8123	10.3598	8.88341	9.82907	5.65691	5.84262	4.95622	-0.762974	4.23847	4.57314e-17	5.92443e-15
Tm9sf3	14.6028	46.9231	39.385	40.6411	29.6025	46.4457	17.6048	30.4684	16.6489	-0.620524	7.67716	4.7527e-17	6.05932e-15
Efcab7	2.39952	4.76945	3.1396	4.61664	3.34224	2.91052	3.49071	5.23811	2.63718	0.90018	2.81009	5.77979e-17	7.25363e-15
Hnrnpab	29.2154	49.2349	52.1268	45.2959	36.9795	70.2084	18.956	45.7515	18.9719	-0.624728	6.768	6.61137e-17	8.16962e-15
Ret	1.78911	4.0147	4.03035	3.45969	2.81585	2.05132	1.55057	1.19961	1.65338	-0.806462	4.29114	8.62168e-17	1.04923e-14
Atp1a1	37.9972	70.4747	109.864	68.4707	67.8765	88.4814	52.9605	57.3467	47.9324	-0.612016	8.04913	1.0473e-16	1.25551e-14
H2-Bl	39.0005	24.7692	28.0371	37.355	32.9947	34.8622	25.5968	22.1722	17.1916	-0.671224	5.11767	1.199e-16	1.41623e-14
Ccdc163	4.80086	2.67706	6.88925	2.5993	6.01684	1.66271	7.00978	3.57791	5.42331	1.2142	2.54355	1.25423e-16	1.45999e-14
Faf1	2.79856	7.84742	6.19429	6.77035	3.80092	6.43462	2.69089	3.96689	2.34255	-0.705206	4.47951	1.36893e-16	1.57075e-14
Odc1	12.9388	45.0372	14.139	37.1358	9.61761	56.4161	5.62438	37.2377	7.42598	-0.620388	6.0565	1.67741e-16	1.8976e-14
Epg5	3.24601	3.7995	3.26678	3.78929	4.53188	2.64126	3.59938	4.10863	2.33476	0.68276	5.1592	1.83256e-16	2.04433e-14
Rap1b	137.65	264.165	247.738	242.813	194.469	255.967	103.377	169.541	112.298	-0.601461	8.60987	2.32716e-16	2.56051e-14
Aggf1	4.64845	13.8358	13.3024	12.7992	8.65076	15.6307	5.45188	10.0086	5.20648	-0.649596	5.10534	3.8618e-16	4.13746e-14
Mtmr1	9.25281	14.518	14.3623	13.0162	12.4285	12.0807	6.75645	7.85872	7.62842	-0.646806	5.72945	3.86342e-16	4.13746e-14
Bod1	3.18579	6.17679	7.55807	5.98102	4.89384	7.41867	3.99388	4.08859	3.66323	-0.854442	2.9721	4.04796e-16	4.27806e-14
Micu2	16.1979	46.4697	44.3624	38.4192	31.0484	41.6129	18.9024	27.3528	18.1403	-0.622851	6.2658	4.20369e-16	4.38494e-14
Elavl1	6.93581	11.7957	10.7868	10.2686	7.46517	12.4986	5.07127	8.14179	5.38178	-0.626241	5.78749	5.85047e-16	6.02449e-14
Psip1	13.0585	26.9384	25.3562	25.1899	17.2338	21.8399	9.13628	14.2122	10.4434	-0.629609	5.92909	6.42733e-16	6.53472e-14
Bcl2	35.9914	12.965	10.967	24.1803	39.3012	15.4685	14.0312	23.7343	41.4716	0.603525	7.4919	6.66883e-16	6.62107e-14
Rrs1	7.55222	11.3719	10.1026	8.75299	7.58705	19.5437	2.85924	12.4858	4.45325	-0.664695	4.33552	6.67712e-16	6.62107e-14
Uri1	8.79448	25.217	23.5986	23.4379	19.0426	22.6019	9.30787	14.9229	9.72567	-0.62566	5.99396	7.0059e-16	6.86236e-14
Fbxw8	2.2069	4.90676	4.98739	5.04325	3.41396	5.96316	2.19811	3.75114	2.33425	-0.68409	4.35321	8.8848e-16	8.59792e-14
Gclc	3.56752	13.2562	12.9524	11.5695	10.402	12.6906	6.94362	8.13937	8.01444	-0.644668	5.15851	1.33631e-15	1.26636e-13
Slc7a5	5.90102	17.3587	26.5042	15.1207	27.0223	65.6945	13.8852	44.0895	14.5602	-0.59329	6.58621	1.34015e-15	1.26636e-13
Rac1	18.5122	43.0467	35.5693	35.811	20.9091	35.6346	18.2996	23.3786	18.3612	-0.612997	6.05138	1.67627e-15	1.56555e-13
Map7d1	5.13584	8.46834	6.38126	7.66557	5.68364	8.05892	4.05611	5.08167	4.18735	-0.680294	4.43167	1.70616e-15	1.57516e-13
Serpina3g	97.1176	22.4306	16.8922	28.7724	24.3366	30.9135	21.396	47.3876	36.0292	0.606995	6.1475	1.74515e-15	1.59285e-13
Panx1	17.4702	26.2145	28.9924	23.2408	18.2712	25.3822	9.7201	16.6126	10.8813	-0.633831	5.41684	1.86108e-15	1.66225e-13
Kras	4.8171	15.8995	11.1906	15.2968	8.00073	17.2876	4.74003	11.3864	5.01017	-0.613737	5.68608	1.86258e-15	1.66225e-13
Zfp746	3.28226	4.81772	4.3248	4.2572	3.17495	5.09274	2.69698	3.16751	3.3324	-0.724686	3.86745	1.91078e-15	1.68652e-13
Tmem248	7.5804	19.4337	13.8976	17.3867	10.7326	22.2541	5.16707	14.6962	6.32465	-0.613864	5.65797	2.00297e-15	1.74868e-13
Ap1ar	6.2638	16.7648	14.771	15.1131	10.8605	15.3644	7.42012	9.87821	5.75758	-0.652337	4.84959	2.06585e-15	1.78419e-13
Irf2bp1	12.1051	26.1045	22.1721	22.6816	21.9778	24.5755	11.1291	16.19	11.6048	-0.618821	5.73663	2.73513e-15	2.33708e-13
Acn9	9.13409	4.21125	4.41645	3.71004	5.75982	7.44719	9.78874	3.42923	6.95301	-1.16839	1.79525	2.80591e-15	2.37232e-13
Cdk16	5.33862	15.4128	13.2151	13.69	12.3561	14.8203	5.64514	9.68544	5.7928	-0.637807	5.10684	3.09934e-15	2.59312e-13
Adcy3	7.78076	12.9276	10.7145	13.0682	9.43631	11.1314	4.39082	7.30023	5.53846	-0.629642	5.50083	3.20176e-15	2.65119e-13
Ppp3ca	9.86828	23.4196	18.0732	20.8931	15.8873	19.8961	10.4198	12.9595	8.9196	-0.636459	5.17509	3.33028e-15	2.72947e-13
Slc25a28	5.04134	12.149	12.3775	12.6106	7.70376	13.1485	7.36912	8.23856	5.32775	-0.715059	3.93036	3.6096e-15	2.92852e-13
Kcna3	6.05145	14.369	17.3412	15.6163	12.6489	18.3977	8.55432	11.9045	5.9968	-0.652434	4.69428	3.8035e-15	3.05497e-13
Gclm	2.07856	9.75792	12.5087	8.85266	9.43585	6.85921	4.68657	4.08977	4.04849	-0.759735	3.95265	4.54719e-15	3.61614e-13
Siah1a	5.71575	11.32	9.29116	9.57566	7.57341	9.10061	3.75801	5.6687	4.42763	-0.698973	4.0393	1.01045e-14	7.87957e-13
Cpox	3.04788	6.20513	7.45314	6.19893	5.02322	6.1122	3.11548	3.83775	2.81608	-0.702206	4.04592	1.07122e-14	8.27315e-13
Bloc1s4	11.4854	16.3127	15.7923	17.892	11.952	19.7899	5.53897	12.6199	5.37336	-0.668578	4.14813	1.1529e-14	8.81911e-13
Stim2	3.34178	8.4765	9.14784	9.26551	6.57899	8.15023	4.59842	5.28144	4.39664	-0.629028	5.10683	1.19358e-14	9.04418e-13
Trak1	3.08668	7.03754	4.5895	6.99774	4.14802	6.40718	3.04934	4.18417	2.68855	-0.645325	4.59491	1.67011e-14	1.25367e-12
Casd1	3.12381	6.34058	7.74987	5.15804	4.4593	5.18312	2.90415	3.24697	4.18456	-0.692182	4.2343	1.87439e-14	1.39399e-12
Tapt1	7.44335	23.7049	19.8496	21.0826	14.4025	22.5442	7.76549	15.058	9.28271	-0.59059	5.86214	2.27432e-14	1.66067e-12
Tmem260	3.9757	3.84597	5.20339	3.79938	4.98849	4.11392	4.29808	2.62929	3.32889	-0.67861	4.47185	2.42293e-14	1.74271e-12
Ube2r2	5.77022	18.8002	13.1578	16.154	8.95777	15.6947	7.74617	10.4155	8.26779	-0.60671	5.354	2.43007e-14	1.74271e-12
Usp1	10.1143	17.3672	19.1374	15.9251	14.3862	19.2818	8.22373	12.8649	8.64017	-0.593346	5.71755	2.60572e-14	1.85213e-12
Etaa1	3.53439	10.0657	8.66445	9.75998	7.58103	8.72604	4.00205	5.69649	4.36759	-0.627268	4.95082	2.78429e-14	1.94464e-12
Ank	3.9911	14.8661	12.9824	13.2155	8.95635	13.6926	7.79021	9.08428	6.60924	-0.609364	5.2444	2.82596e-14	1.95673e-12
Fbxo31	4.28093	9.48948	9.95943	10.1586	9.15077	7.66518	4.63846	4.99009	4.20611	-0.634285	5.05048	3.28806e-14	2.25724e-12
Abhd13	2.89374	5.95069	4.62971	5.69783	3.88153	6.20426	1.68286	4.05475	2.12927	-0.634303	4.49181	3.8276e-14	2.58053e-12
Pithd1	13.0388	43.4095	38.7274	37.936	32.179	47.4989	18.7861	32.0569	15.9335	-0.588264	5.66635	3.85538e-14	2.58053e-12
Ssx2ip	0.709302	4.78785	5.4179	4.498	3.05044	4.83919	1.4607	3.05018	2.57921	-0.700681	3.74763	3.99829e-14	2.65407e-12
Josd1	3.5576	6.17021	7.93849	7.385	6.64625	7.8103	2.56226	5.02892	3.75365	-0.651484	4.35089	4.36129e-14	2.8713e-12
Wwp1	4.78247	7.88833	7.98684	8.3614	5.65218	6.69884	4.91886	4.45232	3.32874	-0.608887	5.35668	4.63738e-14	3.02824e-12
Rfxap	9.02916	16.9093	20.5923	14.6843	14.8897	15.9421	8.03019	10.4987	5.68085	-0.626873	4.88443	4.89919e-14	3.17341e-12
Snx18	2.07649	3.11161	2.97126	3.61223	1.84874	3.21955	1.22452	1.97233	1.77215	-0.730206	3.50697	5.29584e-14	3.40289e-12
Tm7sf3	4.3907	8.40216	10.2821	8.33762	8.09021	7.32025	4.52673	4.68955	4.12706	-0.655048	4.5535	5.47914e-14	3.49274e-12
Btbd1	4.31592	9.48156	8.57247	9.24696	6.33429	9.63774	4.48307	6.21189	4.81349	-0.631812	4.48205	6.48637e-14	4.03864e-12
Habp4	3.65699	6.94752	12.5796	5.53506	8.26873	5.30409	4.32761	3.22367	3.41612	-0.730564	4.02498	9.29557e-14	5.74323e-12
Dusp5	25.3691	20.8371	8.62126	15.9319	6.25001	24.0464	2.2188	15.7706	4.50133	-0.63299	3.9868	1.17563e-13	7.20811e-12
Glrx5	17.9122	40.6525	36.876	36.2632	27.3048	51.1515	13.7743	34.2749	15.2432	-0.595474	4.89804	1.23984e-13	7.4365e-12
Tmem243	7.42269	11.3023	12.29	9.37934	8.88784	13.3221	9.22777	8.17969	8.65324	-0.731074	3.36986	1.24065e-13	7.4365e-12
Gpc1	1.41544	7.38396	3.36709	6.7807	3.17124	5.04396	3.00604	3.19606	1.75444	-0.683437	3.89414	1.37787e-13	8.19784e-12
Rai1	2.30529	4.1593	3.52235	4.22489	2.49563	4.27136	2.30615	2.85636	2.03706	-0.62304	4.60174	1.66709e-13	9.77375e-12
Rras2	4.92699	13.3909	15.2023	13.8861	10.3459	14.2168	5.2451	9.31439	6.46878	-0.615186	4.65316	1.72238e-13	1.00248e-11
Trappc8	5.28906	11.8666	7.96645	11.083	6.33468	9.10725	5.16079	6.13092	5.02313	-0.589707	5.36671	1.84333e-13	1.06515e-11
Nfil3	9.12539	6.7323	6.46555	5.26968	3.71157	8.70139	1.7593	5.5759	3.22754	-0.679749	3.513	2.29929e-13	1.31913e-11
Timp2	0.765729	3.93605	0.804333	3.66091	0.475188	3.0834	0.866232	1.86114	0.693867	-0.753654	2.78214	2.84994e-13	1.62345e-11
Isoc1	4.92226	9.22056	10.0359	9.24916	8.48489	8.23082	4.18941	5.30801	4.36602	-0.638133	4.27251	6.4748e-13	3.56203e-11
Igj	12.1772	6.76394	0.738834	6.77853	0.543096	4.97782	0.833214	7.47204	1.35462	0.655291	3.25192	7.92841e-13	4.30277e-11
Rfng	5.86171	7.50146	11.0262	9.40113	7.97137	7.09434	4.66192	4.56517	4.19376	-0.688225	3.95764	8.43013e-13	4.54435e-11
Yars2	5.77744	8.40033	9.44437	9.48143	6.88415	11.8276	4.05512	7.66693	3.39158	-0.643599	3.63837	2.08073e-12	1.07822e-10
Nrarp	1.16495	7.92954	5.26719	6.7699	4.52369	6.25852	2.51884	4.03637	3.43694	-0.65377	3.68127	3.02378e-12	1.52749e-10
H6pd	2.41293	3.65391	4.14467	3.71915	3.78835	2.82394	3.10485	1.77662	5.10943	-0.678988	4.09272	3.44123e-12	1.71677e-10
Hmgxb4	5.55754	5.95183	7.52988	4.45571	5.92549	6.27646	6.31078	4.26785	6.58948	-0.60465	4.57746	4.3114e-12	2.09874e-10
Apbb1	4.07503	4.95066	7.54745	3.8475	7.65051	2.74037	8.01408	4.31069	5.59192	0.679928	4.07845	4.64788e-12	2.2489e-10
Ipp	10.874	11.0905	8.03836	9.92418	8.85066	7.20164	9.34255	10.6976	9.84326	0.609453	4.39543	4.95272e-12	2.38205e-10
Cercam	9.42647	7.33998	6.45236	8.50411	8.6384	5.51535	8.03472	8.24365	7.86854	0.607905	4.45904	5.34713e-12	2.55644e-10
Lgals4	14.6829	11.8533	17.6746	12.6659	18.8403	9.68802	22.0782	14.3876	18.5301	0.610206	4.57283	6.34589e-12	2.98071e-10
Nxpe4	0.230842	1.22888	1.82817	0.992991	1.60765	1.15281	1.80845	0.591	1.14346	-0.975899	2.11363	7.19087e-12	3.35797e-10
Slfn9	5.85086	4.73278	4.20052	3.89223	4.66188	3.67987	4.36248	5.45634	4.33313	0.606899	4.19703	8.67718e-12	4.02862e-10
Elp6	5.97992	3.5543	6.26059	4.59984	5.74319	4.34139	6.46823	6.71233	4.72621	0.651275	3.54412	1.01602e-11	4.63397e-10
Arl8a	6.68278	14.866	13.3994	13.1271	10.2269	13.7692	6.54011	9.19086	6.19088	-0.586506	4.23638	1.23182e-11	5.49666e-10
Fut7	7.02042	6.80471	6.06307	7.26137	6.14657	3.46639	7.10496	5.49848	4.61632	0.681524	3.62103	2.03813e-11	8.94551e-10
Sntb2	3.97383	6.12789	7.72171	5.28631	5.24842	4.8021	2.96742	3.18978	3.03666	-0.591977	4.45674	2.14124e-11	9.34697e-10
Frat2	2.93354	5.16193	4.52958	4.59776	3.0928	3.90941	1.89446	2.36646	1.88865	-0.729432	2.94632	2.6129e-11	1.12832e-09
D3Ertd751e	3.74361	3.83928	4.25271	3.30543	4.49123	2.84815	4.4623	4.27207	4.46066	0.616959	3.9056	3.87954e-11	1.63144e-09
Trappc10	2.15655	5.05727	5.23854	3.66728	2.83222	4.0469	2.772	2.73242	3.15564	-0.588602	4.24124	4.63735e-11	1.91011e-09
Acrbp	3.34559	3.02596	4.1933	3.57702	5.7385	2.17476	4.39847	3.53344	4.43194	0.788893	2.96836	4.95666e-11	2.01931e-09
Khk	12.6576	9.18915	14.7705	7.80811	12.5695	5.9292	12.5444	9.108	12.8442	0.669989	3.66969	5.12078e-11	2.04762e-09
Lgals6	18.8113	13.6511	21.2251	15.4214	21.9639	12.3729	28.1141	18.314	20.8563	0.606227	4.17653	5.12414e-11	2.04762e-09
Dexi	1.47377	5.01706	6.40572	3.99033	3.48248	3.96355	2.96188	2.27141	2.1661	-0.826404	2.40701	8.0937e-11	3.09565e-09
Yrdc	5.00591	8.02092	7.44961	5.70418	5.15125	9.45501	2.32889	6.18323	3.54857	-0.60977	3.26903	9.18182e-11	3.46236e-09
Ralgds	1.71612	7.12091	4.41091	5.27762	1.83469	4.62924	1.7627	3.12632	1.30195	-0.589894	3.79174	1.15976e-10	4.3126e-09
Pura	4.57794	7.2137	8.30134	5.39743	5.95093	6.99387	4.48808	4.52037	4.64455	-0.649884	3.29493	1.17148e-10	4.3361e-09
Oxld1	5.73379	7.99768	6.803	8.69207	7.61812	9.53038	9.6245	5.90422	8.43042	-0.735819	2.74803	1.3215e-10	4.86894e-09
Ctsh	7.7136	2.14006	0.296908	2.30366	0.789473	1.66574	0.583698	2.84652	1.73791	0.844431	1.82746	1.44356e-10	5.24645e-09
Mtch1	4.35432	7.33603	8.77013	5.28844	5.20769	6.81269	3.67558	4.52262	3.45517	-0.621164	3.47526	1.66605e-10	5.97399e-09
Sepsecs	5.55004	4.90629	4.72173	4.45113	4.6122	4.43064	5.07912	6.63874	4.14704	0.641504	3.32468	1.77754e-10	6.34542e-09
Rdh5	3.52426	2.32433	3.75399	2.42751	5.9062	1.19374	4.45611	2.31486	4.75731	1.03947	2.20011	2.41534e-10	8.32618e-09
Gstk1	6.12298	1.55339	5.0562	1.24823	4.05085	1.00319	3.1392	2.16715	3.85241	1.24566	1.60934	2.49064e-10	8.51267e-09
Spin2c	6.08807	1.41688	2.92944	1.35271	2.72083	5.55966	7.17419	8.35216	10.0958	0.625007	2.80577	3.44046e-10	1.15141e-08
Ms4a6d	14.1997	6.08308	7.00486	5.92959	6.21319	5.89207	6.3588	8.80316	6.78924	0.614419	3.38336	3.78957e-10	1.24745e-08
Rogdi	11.9668	6.7422	18.1749	7.09383	16.0702	5.04649	17.8204	7.63324	12.1923	0.62812	4.07476	4.31902e-10	1.39319e-08
Ap4m1	3.56736	4.7499	2.68427	4.1689	2.92358	3.08293	3.57159	4.77624	3.70421	0.691419	2.73886	5.56911e-10	1.77504e-08
Slc15a4	3.3907	5.57994	5.76696	4.31123	3.82796	4.70315	1.92809	3.13677	2.19267	-0.612651	3.46937	5.59677e-10	1.77681e-08
Macrod1	3.2694	7.04515	12.3267	5.8939	8.81318	6.59448	4.17382	4.15061	4.31047	-0.683734	3.11341	5.69464e-10	1.80076e-08
Hdc	1.12707	2.08209	0.597484	1.4039	2.26615	1.5439	0.957259	2.49065	2.78038	0.727016	2.14884	6.74864e-10	2.10097e-08
Arhgef39	4.3404	3.16775	5.51644	3.67377	5.21358	2.27957	6.26921	3.6796	4.8421	0.748241	2.89501	7.82231e-10	2.37988e-08
Gphn	4.27611	3.16584	5.59528	3.24828	5.19225	3.13509	3.48961	2.07638	4.68283	-0.637903	3.74721	1.02011e-09	3.05729e-08
Bloc1s3	1.48478	6.7351	6.11491	4.84163	2.88608	5.76659	3.00425	3.77896	2.30311	-0.626483	3.01655	1.06195e-09	3.1591e-08
Pecr	7.30832	2.64895	6.777	2.31032	6.29913	2.89009	7.1039	4.6956	7.80557	0.783578	2.71185	1.56786e-09	4.59409e-08
Creld1	3.94259	4.36538	4.31935	3.94541	4.0834	3.5898	3.44709	5.3039	3.69517	0.587032	3.12112	8.41624e-09	2.20217e-07
Zfp457	0.869763	1.67725	3.31992	1.62789	1.44437	0.890223	2.71022	1.56046	2.10533	0.944817	2.04959	8.41717e-09	2.20217e-07
Crtap	1.60065	5.08327	5.68459	4.02957	3.13368	4.8278	1.83811	3.18256	1.72898	-0.645208	2.6714	1.12451e-08	2.90004e-07
Nek3	3.59623	2.59563	4.24345	2.79148	4.43332	3.31307	3.56845	2.22822	3.57144	-0.653398	2.86558	2.07443e-08	5.17447e-07
Wwox	3.43166	2.0662	4.14078	2.49691	4.43789	2.96375	4.68967	1.95272	4.33801	-0.625884	3.01949	7.97742e-08	1.76514e-06
Slc6a19	0.501506	4.80184	6.23869	3.64835	5.19958	2.81247	5.43119	1.87971	4.85972	-0.623083	3.39409	8.11147e-08	1.78987e-06
Rgs11	7.1746	4.14949	4.78993	2.26068	6.73079	2.42035	6.52537	3.62728	6.17125	0.617357	3.34248	1.26543e-07	2.67472e-06
Crb3	3.56327	4.40887	4.12884	3.2346	3.06494	4.51391	3.34468	3.06766	5.09198	-0.661769	2.21823	3.44829e-07	6.51686e-06
Ovgp1	1.86907	0.840907	4.79041	1.09453	4.87944	0.837724	4.76912	1.38094	3.78493	0.779662	2.87729	4.04829e-07	7.49213e-06
Nubpl	4.3142	3.54167	2.59126	2.94069	3.95086	2.9569	3.93977	4.30846	4.43932	0.626414	2.19846	8.6218e-07	1.47655e-05
Nhej1	7.93562	8.08079	8.92089	6.84647	8.67086	6.57428	9.74905	4.64758	9.16671	-0.589343	2.8101	2.56052e-06	3.8804e-05
Hist3h2ba	6.10833	5.357	14.516	5.86401	9.76706	3.53136	12.3282	5.28965	10.6546	0.659406	2.45017	7.36136e-06	9.82167e-05
Slpi	45.5395	3.44253	0.37424	3.77354	5.74614	3.41768	0.24773	4.96243	9.38777	0.591968	2.72532	8.44382e-06	0.000111209
Lst1	12.0889	5.89631	3.23965	6.87859	6.37917	3.84374	5.6075	6.0815	7.58343	0.71073	1.44922	1.37591e-05	0.000173218
Rasl11a	6.76712	5.10169	3.7306	3.47413	4.24746	2.18832	3.48281	3.22111	4.11218	0.629098	2.22292	1.50891e-05	0.000188408
Ly6d	6.60128	3.65128	3.47973	3.94388	3.58949	3.00889	4.63208	4.60444	3.11445	0.615898	1.58685	1.65026e-05	0.000203608
Tctex1d4	1.80325	2.9302	4.06282	3.53771	3.8856	2.17814	2.68666	1.3972	3.44361	-0.731594	1.60388	7.72566e-05	0.000783054
H60b	0.685646	2.94787	1.59989	2.76861	2.31294	2.08911	3.0768	3.07458	0.825832	0.658141	1.1822	0.000103535	0.00100192
Mcpt8	0.190028	0.140393	3.85661	0.328383	8.26712	0.472731	0.434972	1.00038	4.52481	1.03403	1.08036	0.000125621	0.00117324
G0s2	7.7245	2.63059	2.62516	2.86816	3.44419	2.49296	2.5825	1.66458	2.91845	-0.645104	1.43569	0.000321719	0.00260751

## Sheet: memory TCR+TSLP 24h
rownames.diffexp.	media.0h	media.4h	media.24h	media.TSLP.4h	media.TSLP.24h	TCR.media.4h	TCR.media.24h	TCR.TSLP.4h	TCR.TSLP.24h	logFC	logCPM	PValue	FDR
Slpi	45.5395	3.44253	0.37424	3.77354	5.74614	3.41768	0.24773	4.96243	9.38777	5.51053	2.72532	3.74926e-160	3.0114e-156
Ccl6	5.18081	2.66647	2.1752	6.13081	18.6146	1.67014	2.96257	5.43459	16.3066	2.57775	3.41009	5.0777e-130	2.0392e-126
Bcl2	35.9914	12.965	10.967	24.1803	39.3012	15.4685	14.0312	23.7343	41.4716	1.55566	7.4919	1.51289e-92	4.05052e-89
Mcpt8	0.190028	0.140393	3.85661	0.328383	8.26712	0.472731	0.434972	1.00038	4.52481	3.40132	1.08036	9.51567e-59	1.91075e-55
Socs2	6.62302	2.35656	1.02792	3.16716	2.77551	2.84263	1.04853	4.03476	4.2436	2.04417	2.78791	1.38227e-50	2.22049e-47
Cdk20	4.11426	2.74211	4.94224	2.42731	7.79723	2.70185	7.96722	2.24575	2.96631	-1.52291	3.0371	1.51039e-36	2.02191e-33
Hdc	1.12707	2.08209	0.597484	1.4039	2.26615	1.5439	0.957259	2.49065	2.78038	1.79557	2.14884	4.11364e-36	4.7201e-33
Zfp488	8.01537	14.662	25.4865	15.2316	16.5517	10.8141	35.2159	12.7823	18.7697	-1.11698	6.37532	2.5272e-35	2.53731e-32
Olfr613	2.83086	5.03198	7.70037	5.01699	5.5157	3.63747	11.4948	4.95436	6.31903	-1.34108	5.0394	1.04669e-33	9.34114e-31
Tyrobp	53.7383	10.5783	2.28307	12.2939	4.73759	10.8863	2.93394	10.9063	9.04228	1.87388	2.78438	2.17214e-33	1.74466e-30
Peak1	4.94709	4.25724	5.07508	3.99818	3.57637	3.64626	4.19354	3.9069	2.32118	-1.2399	5.52433	2.36621e-30	1.72776e-27
Aoc2	2.79217	2.30626	3.21249	2.02647	4.2255	2.12903	4.39995	2.47302	1.91959	-1.59193	2.94038	7.34815e-29	4.91836e-26
Dag1	2.42222	4.61618	3.00486	4.04937	3.71834	3.27137	3.21159	3.24118	1.66262	-1.4707	4.2686	2.57957e-28	1.59378e-25
Zfp652	3.25197	4.84844	5.25121	4.96536	4.6702	3.04101	4.96829	3.64954	2.19087	-1.40187	3.53442	4.44969e-28	2.55285e-25
Clock	3.03905	3.2978	4.13389	3.32305	3.08857	2.73099	3.92467	2.81753	2.08453	-1.18741	4.64919	8.67605e-28	4.64574e-25
Ap1s3	1.98928	3.75835	5.45735	3.12616	3.93796	2.72262	8.09957	2.90155	4.69152	-1.48307	3.67899	1.42297e-27	7.14333e-25
Vmn1r58	4.67779	8.31073	13.8735	9.01125	9.61659	6.62259	18.8271	7.21761	11.11	-1.11328	4.8649	1.17388e-25	5.54625e-23
Maoa	1.07492	2.28075	2.89415	2.19949	2.37767	1.6284	4.53777	1.95333	2.61578	-1.44788	3.4406	1.34134e-25	5.74017e-23
Ahi1	2.6126	4.78142	2.63671	4.5667	3.49608	5.50181	4.48776	5.45834	2.24989	-1.09706	4.36018	1.35786e-25	5.74017e-23
Mthfd1l	13.5748	14.2038	10.9608	13.802	14.6272	20.7051	9.98338	19.2751	17.7844	0.852149	5.87811	2.74638e-25	1.10295e-22
Mcmdc2	3.43481	4.83795	6.29705	5.22667	5.41432	3.0924	8.25493	4.41361	4.5966	-1.26093	3.80191	9.23943e-25	3.53386e-22
Zfp866	3.71481	6.39931	6.73553	6.60173	7.16103	4.97956	8.85973	6.35349	5.16147	-1.01159	5.26456	6.12645e-24	2.23671e-21
Shq1	6.81996	5.20381	4.99953	5.03966	7.41406	7.88809	4.97817	6.80704	9.32872	1.01474	3.75958	4.94317e-23	1.72624e-20
Rnf19b	5.67855	8.16411	6.11932	7.48766	5.21982	7.24698	2.73146	6.82097	5.54896	1.04646	4.01774	1.02514e-22	3.4308e-20
Smad5	3.19479	3.24542	2.25036	4.3187	2.49266	4.15604	3.52688	3.68322	1.94784	-1.03987	4.55677	1.25084e-22	4.0187e-20
Cdk5rap2	9.99815	9.88211	12.23	10.3178	12.1946	8.7698	12.772	9.87257	7.77707	-0.931438	5.95073	7.3566e-22	2.27262e-19
Zfp937	2.32547	2.81049	3.29689	2.78311	3.10973	1.95053	4.32715	2.35242	2.64353	-1.10287	4.39975	9.70396e-22	2.88675e-19
Serpina3g	97.1176	22.4306	16.8922	28.7724	24.3366	30.9135	21.396	47.3876	36.0292	0.781106	6.1475	1.2236e-21	3.50999e-19
Bcl6	4.36351	12.5065	9.41055	10.5094	10.1787	19.2735	15.6601	14.721	8.75527	-0.792021	5.37725	2.14198e-21	5.93256e-19
Socs1	25.114	24.8045	28.0974	33.1757	28.6482	33.0076	7.84238	29.694	15.7292	0.864649	5.12707	2.60757e-21	6.98134e-19
Cish	60.0776	16.3813	9.44254	23.1765	14.092	39.8283	9.25282	70.3604	16.5554	0.823766	5.9358	3.25001e-21	8.42067e-19
Pim2	90.0574	59.4344	41.5039	65.7368	61.9927	64.1027	46.3991	75.3753	75.8254	0.7236	7.08463	4.73529e-21	1.18856e-18
Flnb	8.17924	7.12472	4.51957	6.76157	6.08267	4.7	6.15968	6.04686	3.92071	-1.01034	5.81213	7.78869e-21	1.89572e-18
Ctsh	7.7136	2.14006	0.296908	2.30366	0.789473	1.66574	0.583698	2.84652	1.73791	1.80881	1.82746	8.64228e-21	2.04161e-18
Zfyve26	3.05446	5.09024	4.79861	4.35539	4.37349	4.0043	4.93014	4.34483	3.13686	-1.04398	5.4066	9.31309e-21	2.13722e-18
Slc17a5	3.43066	8.33294	8.64484	8.12499	7.12952	7.391	9.40503	6.85661	5.25111	-0.852448	4.6427	2.75558e-20	6.14801e-18
Socs3	71.738	33.2572	15.947	38.8183	25.0154	26.2548	11.6548	28.7326	19.7958	0.758978	6.32238	5.15675e-20	1.11943e-17
Fbf1	2.64698	4.72231	3.81124	5.82916	4.51397	5.30474	3.65907	5.81685	2.19596	-1.16615	4.62094	5.55962e-20	1.17513e-17
Epg5	3.24601	3.7995	3.26678	3.78929	4.53188	2.64126	3.59938	4.10863	2.33476	-1.07654	5.1592	8.71288e-20	1.79441e-17
Manea	2.83397	3.65646	3.48232	3.283	3.44184	3.07432	3.53791	4.17961	2.03843	-1.14785	4.01244	1.43312e-19	2.8777e-17
H60b	0.685646	2.94787	1.59989	2.76861	2.31294	2.08911	3.0768	3.07458	0.825832	-2.14863	1.1822	2.37173e-19	4.64627e-17
Cd19	2.97821	2.46763	2.17415	2.4271	1.25944	1.64202	2.56935	1.61112	1.16819	-1.42971	2.39822	3.97427e-19	7.60032e-17
Pdcd11	9.79157	6.46381	7.27633	6.34399	7.38863	8.67762	10.6511	10.6611	6.70343	-0.854619	5.704	6.12993e-19	1.14501e-16
Gale	14.4255	13.5995	7.8108	19.0373	6.10779	13.7846	4.57854	16.8852	8.14301	1.01601	4.20235	9.68243e-19	1.76748e-16
Etv3	8.29428	4.91059	6.82222	5.50267	7.18083	6.69036	7.30506	8.56151	4.72606	-0.979001	5.25845	1.46296e-18	2.61122e-16
Pola1	3.63107	3.34861	4.22344	3.38162	3.52145	3.02214	5.6841	2.57971	3.30609	-0.834453	4.36773	1.5466e-18	2.67606e-16
Prkci	1.55916	3.38204	3.20055	3.81522	2.53677	4.05956	2.39283	3.09959	1.32354	-1.19941	3.74655	1.56592e-18	2.67606e-16
Aff1	3.59877	4.3053	2.65016	4.08203	4.40236	4.15219	4.59579	4.60106	2.89038	-0.930112	5.10898	1.77045e-18	2.96256e-16
Sh3bp2	6.69943	3.92188	1.71777	3.82509	3.67625	11.1202	10.56	11.7037	6.16428	-0.837188	4.40595	2.25968e-18	3.70403e-16
Atxn7	2.80601	4.66069	6.21046	5.17589	4.9782	3.68793	5.87675	3.52682	3.56364	-0.82485	5.04594	2.58933e-18	4.15949e-16
Sprtn	2.96716	3.02949	3.94693	4.20826	3.10401	4.31097	3.51644	3.01874	1.85942	-1.41606	2.91204	3.77466e-18	5.94473e-16
St6gal1	2.76353	3.24799	3.75117	2.44411	3.26767	3.36957	4.06978	2.32953	2.25955	-0.89842	3.88195	6.56552e-18	1.01412e-15
Osbpl3	20.0736	10.0734	7.16074	10.1688	9.58517	16.4528	9.26563	18.5621	15.0201	0.668309	6.48241	6.94773e-18	1.05291e-15
Urb1	4.66154	3.68267	3.25999	3.30122	3.36198	5.21452	3.45002	5.80158	2.28949	-1.10693	4.90869	9.95622e-18	1.4809e-15
Timm9	23.5276	8.69631	11.6277	6.31464	15.0787	15.6714	11.8057	15.6098	20.2403	0.843589	3.89918	1.25903e-17	1.83864e-15
Atp10a	11.8616	8.84725	10.3477	8.87963	11.6334	11.1647	5.10368	10.0598	8.58169	0.689607	5.76789	2.4048e-17	3.44917e-15
Ybey	2.19274	2.65386	3.45564	2.53089	3.21271	2.40557	3.80932	3.23245	2.24236	-0.983056	3.79003	2.68137e-17	3.77838e-15
Klhdc1	11.1671	5.23288	7.25019	4.96402	8.06976	5.58229	6.45886	4.67088	11.0447	0.822872	3.85281	3.42243e-17	4.73948e-15
Pus7	9.11077	6.51876	7.98952	6.64348	6.82768	14.8408	4.87567	14.5502	8.09049	0.781021	4.93044	3.83461e-17	5.22027e-15
Fbxl14	8.56348	11.5843	13.17	11.2589	11.5576	9.83361	6.20375	7.60335	10.2144	0.701159	5.47676	5.87753e-17	7.86805e-15
Thop1	6.42099	3.78875	2.69301	4.0794	3.34949	5.69585	1.73578	6.13227	3.39357	1.0692	3.45064	8.3486e-17	1.09928e-14
Tfeb	16.4433	15.7592	13.0419	14.8242	14.9482	14.261	9.48697	12.2063	15.2267	0.72989	5.08761	1.22775e-16	1.59053e-14
Elp4	3.71859	3.99927	2.85912	3.25516	3.71906	3.5083	2.91561	4.10257	4.94445	0.833426	3.91046	1.32204e-16	1.6855e-14
Pygl	4.20469	13.1378	9.81765	16.1797	10.1585	11.9337	11.4312	10.8664	7.06844	-0.823249	4.98333	1.3648e-16	1.71282e-14
Naif1	4.16757	4.90888	5.3013	4.85877	5.00078	5.59442	5.09706	5.14727	2.99635	-0.990764	4.00733	1.441e-16	1.78063e-14
Myc	124.911	24.7821	54.5291	25.0983	73.7639	94.8291	53.2081	114.783	81.1387	0.627195	7.44869	1.55761e-16	1.89556e-14
Ccdc88c	26.2109	28.0546	20.413	30.0319	23.8344	21.1509	21.9872	25.5817	14.6373	-0.723826	7.2774	2.95419e-16	3.5415e-14
Pcnxl4	4.89914	4.36063	3.93639	4.30311	4.50088	4.71924	5.89864	4.0684	3.55143	-0.813858	4.37087	4.14003e-16	4.89011e-14
Usp40	2.95472	4.06847	4.18683	3.98773	4.51089	4.28089	5.84328	5.14626	3.66851	-0.814591	4.60593	4.22892e-16	4.92271e-14
Gvin1	42.5062	15.5331	11.397	22.7444	22.3932	13.6593	14.3514	19.4748	22.3905	0.596641	7.54864	4.71312e-16	5.40797e-14
Usp45	4.93744	2.55061	4.10954	2.49756	3.17894	1.95546	3.76112	2.16683	2.37412	-0.917617	4.2547	4.80005e-16	5.43014e-14
Ipo11	10.7552	8.44423	7.34282	8.6274	8.71321	8.6127	13.6514	10.2491	8.58715	-0.69655	5.40336	5.24622e-16	5.85245e-14
Ndst1	3.24317	3.50465	2.59121	3.34963	2.75951	3.06242	2.43632	3.42201	1.64023	-1.16946	4.19751	6.17883e-16	6.79841e-14
Mettl1	18.1975	4.01844	4.77696	6.53319	6.58116	21.2854	5.69524	24.5468	10.4554	0.995933	3.35483	9.53698e-16	1.03515e-13
C1qbp	40.3101	29.302	40.3204	31.7639	37.6778	64.7217	17.809	52.5492	28.9891	0.684739	5.5296	1.18458e-15	1.26861e-13
Gabarapl1	12.8576	17.8834	11.8179	15.9821	14.8292	21.8292	15.5302	21.8411	24.2654	0.685727	5.03125	2.35486e-15	2.48872e-13
Tfrc	3.74262	2.94945	2.01073	2.54962	3.56075	10.6494	4.86921	10.4558	2.9459	-0.78913	4.65732	2.70566e-15	2.82232e-13
Dcp1a	14.1697	14.6031	13.3962	14.8479	12.9463	13.0779	15.6707	15.8606	10.4294	-0.691033	6.36172	3.93816e-15	4.05529e-13
Slc48a1	24.2492	20.2694	20.5888	21.056	24.5703	25.2295	20.2325	26.06	30.6266	0.637092	5.96503	4.15564e-15	4.22507e-13
Ifit1	30.1956	9.00921	4.92769	8.54276	4.38079	8.3865	3.33341	9.73357	5.50142	0.872651	4.54185	4.21823e-15	4.2351e-13
Hps6	9.67283	13.1903	10.6168	13.8908	12.4342	11.9069	6.942	10.9211	11.3849	0.7128	4.98809	4.27886e-15	4.24294e-13
Utp18	24.806	20.1348	29.4512	18.936	23.5014	29.5242	16.4306	26.2166	25.0307	0.641395	6.02045	5.27937e-15	5.17121e-13
Taok2	16.0293	19.2123	15.5706	20.5412	20.1328	16.6748	18.6662	19.0702	12.6511	-0.722826	6.61391	5.55576e-15	5.37637e-13
Dgke	3.66219	4.32833	4.51205	4.68323	4.57069	4.34628	4.39244	4.10372	2.81545	-0.893564	4.51218	6.84553e-15	6.54563e-13
Ramp3	0.133057	4.87353	0.114779	4.88565	0.139663	7.86113	0.306617	7.83624	1.092	2.15981	2.0086	7.43521e-15	7.02583e-13
Prdm2	6.46433	5.01199	4.7782	5.42655	4.29138	4.06613	4.70592	4.41707	3.17343	-0.79687	5.52269	8.90298e-15	8.31497e-13
Prep	15.0267	15.2783	16.5973	18.7683	15.1067	22.7689	9.82601	20.157	15.3955	0.653723	5.55739	1.25896e-14	1.16229e-12
Ehd1	14.5322	35.9496	11.1074	34.8005	14.8748	68.9905	9.96811	63.8045	15.5972	0.643492	6.63772	1.38013e-14	1.25968e-12
Gpr34	5.7047	4.99183	2.99129	3.94938	5.04843	4.13866	3.33221	5.36537	6.04462	0.858356	3.19065	1.42244e-14	1.28371e-12
Selt	9.80503	8.4901	14.4839	8.58857	9.04414	8.60325	12.0869	8.45639	7.61014	-0.654579	5.18566	2.04258e-14	1.82289e-12
Hivep2	6.89469	10.4656	7.38316	10.8723	8.84827	10.5696	9.98179	10.5226	6.80109	-0.691484	6.56913	2.38213e-14	2.0991e-12
Supt6	17.6488	15.1015	13.2452	14.8944	13.2272	14.9094	15.1259	19.0636	10.45	-0.730481	6.59369	2.40435e-14	2.0991e-12
Tnfrsf10b	2.35638	3.10084	4.07269	2.90903	3.73134	3.0065	5.79035	3.26122	3.79752	-0.902821	3.61098	2.68104e-14	2.3155e-12
Alg14	10.4208	6.97878	9.96448	7.25032	7.35619	6.73784	7.13174	6.22206	12.2428	0.903811	2.97227	2.89647e-14	2.47494e-12
Erlin1	6.66697	3.89107	3.43886	4.79866	3.98878	4.44969	3.2958	4.90887	5.31492	0.794935	3.9587	3.20538e-14	2.71007e-12
Jun	159.224	4.35295	1.28026	5.66955	2.02857	7.37705	0.802728	5.79105	1.75112	1.09468	5.69113	3.2993e-14	2.76041e-12
Fus	33.3295	58.5865	20.6342	54.7287	34.9584	48.7766	38.1844	65.4164	26.8091	-0.798349	6.36374	4.0184e-14	3.3274e-12
Scd2	5.10599	9.25705	2.51076	9.22594	2.64717	7.38648	2.97755	7.85342	1.87597	-0.888282	4.94045	5.87756e-14	4.8172e-12
Tchp	7.49527	6.75934	6.46491	7.29735	7.17379	6.15582	4.11806	6.69739	6.96269	0.730498	4.2918	8.26767e-14	6.57294e-12
Apaf1	6.34702	9.94993	5.70878	10.5776	6.16453	7.55001	7.16889	7.13473	4.79516	-0.712163	5.65242	8.29312e-14	6.57294e-12
H6pd	2.41293	3.65391	4.14467	3.71915	3.78835	2.82394	3.10485	1.77662	5.10943	0.681455	4.09272	8.34266e-14	6.57294e-12
Cpne7	2.67375	7.68805	19.5869	7.58789	18.112	4.33344	15.9222	3.60463	10.3672	-0.706583	4.70716	8.3471e-14	6.57294e-12
Usp9x	6.03193	11.474	8.21517	11.3627	8.86135	11.6679	10.7234	12.6477	7.37953	-0.662317	6.96711	9.37796e-14	7.31299e-12
Emd	13.7485	20.3163	29.692	17.7596	13.782	16.0186	12.3239	16.3999	18.681	0.693204	4.90989	1.03963e-13	8.02918e-12
Lrrc51	2.42324	4.55731	4.72699	5.47026	7.00596	3.67863	7.47476	4.30191	3.73712	-0.999237	2.30389	1.09089e-13	8.34478e-12
Cd83	5.56129	12.1337	1.37832	11.1838	0.995333	35.9692	4.12875	35.9305	2.13814	-0.889517	4.79467	1.27457e-13	9.65789e-12
Zfp445	12.0406	14.3606	14.6841	12.9165	13.955	11.1861	14.58	13.9337	10.0662	-0.677409	6.42844	1.37266e-13	1.03039e-11
Rft1	7.42803	10.7901	7.72492	9.71362	9.81877	9.51949	13.5551	9.50384	8.78888	-0.732197	4.59418	1.61888e-13	1.20396e-11
Cox11	8.02398	11.2651	9.49869	10.4219	9.11182	12.2561	4.82345	9.39039	8.03942	0.720559	4.4446	1.75974e-13	1.29672e-11
Rbm19	9.3007	5.41492	4.60909	4.41483	6.65235	5.95019	6.15707	7.31052	4.15739	-0.845905	4.61606	1.94098e-13	1.4045e-11
Oxsm	3.1008	3.55782	3.75525	3.80173	3.59569	2.80373	4.2183	3.46892	2.71456	-0.905107	3.77768	2.70814e-13	1.94212e-11
Tspan32	21.5698	6.29876	8.50388	6.72361	10.7839	4.8464	13.3462	6.03419	8.31195	-0.733674	4.03579	2.88946e-13	2.05382e-11
Ssx2ip	0.709302	4.78785	5.4179	4.498	3.05044	4.83919	1.4607	3.05018	2.57921	0.847867	3.74763	3.32337e-13	2.32623e-11
Fosl2	5.09755	3.39377	1.08165	3.02947	1.82385	4.9003	2.06282	5.14616	1.28574	-0.934491	4.20291	3.33064e-13	2.32623e-11
Hspb6	1.81268	5.84244	2.98837	4.50742	3.62072	3.74403	4.63948	3.93357	2.54195	-1.21599	2.4079	3.44088e-13	2.38251e-11
Pgls	44.4516	37.1867	47.8724	37.6226	41.6599	37.0414	22.9474	34.1029	35.9893	0.634834	5.11255	3.58841e-13	2.46343e-11
Lyz2	28.1603	17.0819	2.05025	15.0229	1.28022	19.6011	7.66378	13.7402	11.8431	0.770895	3.80007	3.6956e-13	2.51552e-11
Sec16a	14.4277	15.6164	15.7277	17.2661	16.1647	15.5053	14.6319	16.0127	10.3545	-0.669615	7.12995	3.76921e-13	2.54406e-11
Zfp146	4.65592	4.36831	5.47172	6.3269	5.11846	4.32091	5.94727	5.18294	3.62046	-0.922523	3.43559	4.62442e-13	3.09528e-11
Cks2	34.9117	24.8981	7.41706	25.0317	10.0357	27.3243	9.32439	26.0286	16.6889	0.792897	3.81451	5.54261e-13	3.67919e-11
Slx4	7.52356	6.1687	5.95635	6.46531	6.48991	6.03888	7.76356	6.25775	5.38262	-0.739346	5.27762	5.67784e-13	3.73807e-11
Top1mt	7.8851	5.36562	7.23918	5.54502	6.80684	9.92242	6.21863	9.83824	9.64244	0.743532	3.9136	7.64533e-13	4.99246e-11
Kdm4d	2.25386	6.21692	4.70996	5.44757	3.77468	4.63721	5.30237	5.03952	3.07514	-0.736866	3.68224	9.71954e-13	6.29576e-11
Mgat5	1.74296	3.05463	1.68049	3.51766	1.61142	3.3162	2.12646	3.17161	1.18071	-1.09111	2.96584	1.01555e-12	6.51742e-11
Clasp1	4.70419	5.63802	5.21364	6.8329	5.18435	6.13721	6.3769	6.53011	4.43606	-0.701959	5.56437	1.02972e-12	6.51742e-11
Ptprj	2.14198	3.42082	1.93858	3.21173	2.1555	3.05823	2.26269	2.57634	1.54788	-0.908041	4.31597	1.03052e-12	6.51742e-11
Pot1b	3.18748	4.3651	6.37122	3.87543	4.97896	3.33356	6.63904	4.42293	4.41154	-0.779295	4.12373	1.21371e-12	7.55701e-11
Ccl1	0.544546	0.741537	1.22438	2.39232	0.719623	250.837	38.5791	224.559	22.8869	-0.663883	4.997	1.52264e-12	9.40755e-11
Stx2	16.4335	13.6656	10.1469	13.0765	12.9954	12.1453	6.27609	10.8864	9.59122	0.635008	5.14357	1.66808e-12	1.02275e-10
Kif13b	3.15294	3.60141	3.46717	3.54696	3.3652	2.71939	3.76539	2.87125	2.66058	-0.874963	4.2639	1.88756e-12	1.14855e-10
Wwp1	4.78247	7.88833	7.98684	8.3614	5.65218	6.69884	4.91886	4.45232	3.32874	-0.724546	5.35668	1.93534e-12	1.16302e-10
Kdm5c	23.275	22.0027	15.8236	24.6315	21.5635	20.9855	20.4666	21.3668	14.3856	-0.613583	7.07653	1.94029e-12	1.16302e-10
Slco4a1	4.75992	2.14653	2.56581	2.88286	1.7761	7.58143	4.07245	8.21338	2.26829	-0.71577	3.69353	1.98704e-12	1.18222e-10
Klhl28	9.60534	7.66251	7.01611	8.38578	7.16992	7.18301	9.22336	8.61634	6.25667	-0.751184	4.55695	2.04607e-12	1.20838e-10
Cmss1	6.99569	6.90564	4.59745	7.52146	6.46534	8.1814	4.89778	6.62788	8.08862	0.868362	3.0436	2.11748e-12	1.24143e-10
Colec12	2.9754	4.42295	4.60139	4.80122	4.52265	3.88396	6.42881	3.92301	4.29499	-0.769524	3.97996	2.26436e-12	1.31368e-10
Szt2	3.1446	4.03533	3.73844	3.48323	3.6509	2.98853	4.08892	3.22392	2.92118	-0.750819	5.33921	2.27342e-12	1.31368e-10
Traf3	5.96823	5.85632	4.50418	7.05623	3.98927	7.20436	4.25728	7.74239	3.01496	-0.808564	5.3688	2.6584e-12	1.52516e-10
Lztfl1	5.35077	7.30845	5.05442	6.48257	3.94984	6.38398	5.0318	7.19836	3.12867	-0.755595	4.31264	2.84666e-12	1.61729e-10
Atm	4.39835	2.98856	4.78776	3.47432	4.43451	2.66526	4.53418	3.5235	3.31021	-0.740815	5.58651	3.01968e-12	1.69609e-10
Csnk1g1	4.39891	5.38986	4.71357	5.77886	4.17434	4.83019	4.95154	5.62828	3.50136	-0.763184	5.19002	3.14826e-12	1.74392e-10
Timm8a1	38.7378	14.0048	20.4029	13.5153	22.7759	32.302	16.6177	31.9521	24.7561	0.645349	4.84854	3.41711e-12	1.87988e-10
Zswim4	5.62925	14.0664	9.21651	15.2725	9.66747	17.1625	5.68341	14.1963	8.53912	0.60874	5.67181	3.45777e-12	1.8893e-10
Cdca8	4.20848	4.92555	2.61401	4.01924	2.1381	4.35032	1.27648	3.78745	2.42967	1.12653	2.48523	4.5471e-12	2.46772e-10
Gpc1	1.41544	7.38396	3.36709	6.7807	3.17124	5.04396	3.00604	3.19606	1.75444	-0.787228	3.89414	5.24561e-12	2.80885e-10
Slc25a1	14.8914	29.3461	20.8341	28.2813	19.8918	32.8861	15.106	30.2128	22.5191	0.60234	5.39498	5.42678e-12	2.88661e-10
Hif1an	9.17536	14.3296	10.4661	15.7966	12.6953	13.268	12.3113	17.2447	8.83147	-0.666595	6.38818	6.76634e-12	3.57547e-10
Tbc1d22a	14.4237	17.8215	11.5525	19.9012	14.4936	16.8305	10.375	16.1368	15.2152	0.596182	5.67834	7.70979e-12	4.04739e-10
Gtpbp3	3.37519	4.35838	5.17271	4.29198	4.01034	4.1584	4.34611	5.20136	2.90953	-0.960024	3.64207	8.55761e-12	4.46329e-10
Gtf2a1	12.0156	16.5681	13.3081	18.4529	14.6085	14.9279	14.7675	15.6409	10.3998	-0.615864	6.45825	8.65408e-12	4.48449e-10
Npm3	14.0184	15.1753	21.2476	10.4051	11.077	14.2803	10.1912	13.2598	15.8021	0.750085	3.66638	9.66262e-12	4.97501e-10
Dnajc18	4.42681	4.73839	3.06178	5.21396	4.50242	4.09481	5.17331	5.03145	3.35995	-0.645326	4.57598	1.01495e-11	5.19242e-10
Nipal1	2.31692	4.1954	5.02224	4.14922	3.77526	3.98621	3.6723	4.83495	5.46013	0.684124	4.22712	1.06443e-11	5.4111e-10
Pcyox1	7.62194	7.6301	6.89005	6.03938	7.22488	6.73046	9.5486	5.86991	6.44527	-0.624645	5.00266	1.16244e-11	5.87216e-10
Zdhhc24	3.72106	4.83537	4.52512	4.2799	3.52656	4.65266	5.94683	4.43619	3.8126	-0.795011	3.58318	1.26011e-11	6.32573e-10
Dusp5	25.3691	20.8371	8.62126	15.9319	6.25001	24.0464	2.2188	15.7706	4.50133	0.962428	3.9868	1.33903e-11	6.68019e-10
Cbfa2t2	4.74128	7.53574	6.8715	6.63546	6.98246	6.65626	6.81254	6.99189	4.57727	-0.609628	5.37178	1.47514e-11	7.31379e-10
Nup214	12.4207	14.9912	12.3086	15.3424	13.7773	14.5924	15.0059	14.0176	10.7155	-0.588824	6.89258	1.68964e-11	8.28125e-10
Pdf	12.9022	15.8376	18.196	15.8842	16.1461	17.3754	7.45115	14.3244	11.7916	0.646093	4.53966	1.69089e-11	8.28125e-10
Gtdc1	2.69682	5.26347	4.41682	4.72951	3.49538	6.52076	5.31032	6.6507	3.26251	-0.736715	3.68176	1.71928e-11	8.36924e-10
Cnbd2	1.57803	2.50509	4.01833	2.77618	3.11048	1.8309	3.67246	2.02434	1.95058	-0.826683	2.5765	1.83404e-11	8.87412e-10
Nasp	14.2481	11.8568	10.6014	11.5191	10.0124	14.9793	9.60641	13.7333	13.8561	0.601292	5.29665	1.86172e-11	8.95407e-10
Dtx1	35.0327	5.13551	5.02363	4.43342	4.12599	7.47804	3.94696	4.47635	2.66661	-0.860581	4.75885	2.09653e-11	9.96411e-10
Mdc1	5.52435	3.52977	5.26374	3.93052	5.19684	3.32535	5.5056	4.0776	4.21504	-0.807155	5.12812	2.17402e-11	1.02716e-09
Smco4	3.01198	3.97289	7.73869	5.27526	4.56179	6.10766	7.54944	5.788	3.93897	-0.844419	2.44909	2.18748e-11	1.02748e-09
Il1rap	6.09971	4.75138	3.95449	3.9471	5.89192	3.83463	5.00552	4.25908	3.44539	-0.747939	4.4405	2.62073e-11	1.20975e-09
Jmjd4	4.78006	3.4584	4.22703	4.16004	4.55933	3.96695	4.68561	3.85789	3.32335	-0.826515	4.25526	2.76809e-11	1.27048e-09
Gtf2ird2	5.96313	5.21029	7.48498	5.39611	9.29988	4.6664	4.65019	4.64986	7.24119	0.600169	4.46908	3.00876e-11	1.37309e-09
Gatsl2	2.51359	6.35445	3.19971	6.80818	5.82056	5.03633	4.3756	5.57375	3.25847	-0.880458	4.60119	3.2905e-11	1.49318e-09
Kcna3	6.05145	14.369	17.3412	15.6163	12.6489	18.3977	8.55432	11.9045	5.9968	-0.850918	4.69428	3.45529e-11	1.55915e-09
Sptbn1	16.2102	10.5188	13.4247	12.6874	15.7876	11.2295	16.7389	12.8057	12.2218	-0.590665	7.01526	3.75531e-11	1.68507e-09
Spc24	3.61188	3.47827	3.64861	3.51555	4.35102	3.12173	5.15796	3.82793	3.1248	-1.00268	2.42886	4.27806e-11	1.89842e-09
Nfil3	9.12539	6.7323	6.46555	5.26968	3.71157	8.70139	1.7593	5.5759	3.22754	0.852159	3.513	4.51534e-11	1.99271e-09
Wdr7	5.65654	4.10745	3.62675	4.06936	4.79179	3.42345	4.88883	3.65119	3.60577	-0.751897	4.96636	4.56409e-11	2.00321e-09
Pdss2	4.66371	4.58075	4.14803	4.04225	4.21857	4.75655	4.82465	3.64895	2.81776	-0.866874	2.96747	4.60204e-11	2.00889e-09
Bcl9l	8.47306	10.3726	10.2904	9.61179	9.58953	6.46614	8.68053	7.04975	6.37576	-0.716149	5.58315	4.79586e-11	2.07099e-09
Ptpmt1	11.3545	14.7851	15.9084	15.0362	12.8875	15.1323	8.01063	16.3713	12.4899	0.664979	4.23303	4.97228e-11	2.12433e-09
Pex6	3.34647	3.58583	4.27723	2.754	3.17174	2.94497	3.52374	2.41586	2.08956	-0.742126	3.39447	5.00159e-11	2.12554e-09
Mdm1	5.98678	3.66172	4.67923	3.17747	5.39875	1.9593	5.8789	1.81984	3.74179	-0.66254	3.72213	5.20555e-11	2.20058e-09
Fam20b	9.42861	11.7163	8.28073	10.1098	9.2548	10.8191	9.37149	10.2481	6.60479	-0.657322	5.40669	5.68188e-11	2.38936e-09
Camkk1	5.04234	5.31171	6.96595	5.12521	7.28833	6.3641	4.38761	5.51951	6.59646	0.637581	4.41771	5.93542e-11	2.48298e-09
Sqle	6.33839	8.62848	6.76246	8.54992	7.61085	12.1938	9.07872	12.6228	6.1144	-0.667714	4.64757	8.34056e-11	3.40058e-09
Dcdc2c	6.20465	6.96962	9.14331	8.48446	8.81953	6.85682	12.4039	7.3966	9.01048	-0.838505	3.68373	8.4749e-11	3.4379e-09
Gcfc2	3.59289	4.76149	5.68188	5.54726	5.27018	4.89859	2.56636	4.82421	4.25886	0.647359	4.03771	9.15247e-11	3.6941e-09
Slc5a6	5.85718	3.59613	5.39603	3.49919	6.40629	5.82424	4.57415	6.70452	6.59674	0.636164	4.27853	9.42767e-11	3.78615e-09
Slc35f2	11.9122	6.77844	6.89476	7.23778	8.32035	9.58484	7.57939	9.18669	10.8388	0.611784	4.5261	9.96218e-11	3.98091e-09
Tbc1d2b	8.128	7.72159	8.11964	7.32732	6.0434	8.67424	6.53567	7.78618	4.66521	-0.647664	5.48633	1.35021e-10	5.36874e-09
Cyb5d1	7.40419	10.2382	11.9561	9.48734	12.2606	9.56791	15.7822	12.8746	9.50187	-0.676515	3.18451	1.37717e-10	5.44897e-09
Nxpe3	5.09863	4.80549	5.77768	5.53494	7.10097	2.79568	6.88106	3.03171	4.87566	-0.635108	5.12181	1.45309e-10	5.72118e-09
Gmnn	15.4235	17.3623	14.1664	17.7413	14.1822	13.3426	20.8368	14.4045	13.6128	-0.633825	4.00587	1.64248e-10	6.431e-09
H2-Bl	39.0005	24.7692	28.0371	37.355	32.9947	34.8622	25.5968	22.1722	17.1916	-0.589434	5.11767	1.64938e-10	6.431e-09
Fmnl3	3.60215	4.89982	3.24185	6.62244	4.85449	11.3738	6.53148	11.1894	5.16746	-0.893875	4.89887	1.73892e-10	6.7149e-09
Cchcr1	5.67325	6.39214	9.44567	5.91395	8.68177	5.7967	8.69427	6.21307	5.7896	-0.631714	4.29957	1.86496e-10	7.13302e-09
Pi4kb	8.54629	6.80084	6.44681	7.09376	6.21905	6.28765	5.39807	5.85894	4.08413	-0.854484	4.59142	1.97094e-10	7.50266e-09
Bpnt1	14.1475	9.78445	10.2198	8.60154	9.72465	9.28749	7.54192	8.92685	11.1904	0.602878	4.48676	2.08227e-10	7.88907e-09
Fut7	7.02042	6.80471	6.06307	7.26137	6.14657	3.46639	7.10496	5.49848	4.61632	-0.750264	3.62103	2.23798e-10	8.4392e-09
Fads1	2.8175	4.48755	3.37477	3.99372	4.89196	3.80085	5.79159	4.61344	3.78345	-0.634833	3.94483	2.31429e-10	8.68617e-09
Pdik1l	4.70975	7.51827	5.54965	6.56175	6.47042	7.5723	7.38251	7.0155	5.13471	-0.603995	4.98072	2.45078e-10	9.14607e-09
Faim3	1.91106	5.70757	2.33169	6.26349	1.19338	3.71129	2.42902	3.17283	1.17914	-1.08575	2.34822	2.4596e-10	9.14607e-09
BC026590	6.369	4.5186	4.46175	3.51834	4.29844	5.08908	5.70985	5.95719	3.9434	-0.655966	4.4473	2.76626e-10	1.02196e-08
Kank3	1.60903	1.85619	6.20689	1.51632	4.75235	1.46976	5.6684	1.5692	3.64897	-0.675847	3.17191	2.9508e-10	1.07731e-08
Zadh2	6.47512	11.9269	11.1724	11.0619	9.76185	10.2985	11.0425	10.8513	7.89755	-0.633869	5.15408	3.00835e-10	1.09335e-08
Gls	2.61643	3.38766	5.23851	3.13088	3.48187	3.3749	4.20568	3.22333	2.88523	-0.667372	4.2191	3.42825e-10	1.22927e-08
Ccdc117	11.725	17.6104	11.6075	16.2922	9.94913	17.0468	6.93425	9.92294	4.91673	-0.686848	5.38295	3.57285e-10	1.27543e-08
Dvl3	1.93944	6.20404	4.82557	5.69238	3.79125	5.21512	1.90224	3.91723	3.35743	0.682415	3.69111	3.59841e-10	1.27887e-08
Dopey1	4.8613	4.17739	4.01882	5.09919	5.18571	4.02479	4.96772	4.09813	3.69333	-0.670729	5.42317	3.70454e-10	1.31079e-08
Dyrk1a	3.51707	4.14658	4.19475	4.46012	3.28189	3.30391	3.99399	3.13382	2.76712	-0.652694	4.52737	3.86927e-10	1.36307e-08
F2rl2	13.9051	3.26219	0.922341	3.2021	2.75538	3.47547	1.01993	4.28722	1.75354	1.00403	3.16676	3.95498e-10	1.38718e-08
Cutc	14.553	12.0004	15.9744	10.9681	13.1562	11.9734	11.4972	12.2033	16.513	0.628394	4.17936	4.00824e-10	1.39975e-08
Adnp2	9.13288	9.41007	8.86573	9.08529	7.76205	9.26695	8.40064	9.69542	5.89836	-0.599927	5.23547	4.28695e-10	1.4906e-08
Sfpq	8.76611	7.79509	6.5032	6.4624	4.74305	8.91223	3.21025	7.19586	4.9504	0.611957	4.54613	4.57466e-10	1.57698e-08
Klrb1c	17.354	13.2564	7.19336	12.5714	5.76883	11.1294	7.10713	11.8589	4.67756	-0.629993	4.75492	4.69193e-10	1.60364e-08
Frs2	3.64295	7.27267	7.13398	6.2865	6.94005	5.89184	7.02602	6.93077	5.17914	-0.656059	5.25855	5.01249e-10	1.69875e-08
Zfp65	3.89133	6.14832	5.88576	4.71477	5.16748	5.12641	7.51533	5.20829	5.6336	-0.702911	4.53729	5.18236e-10	1.74894e-08
Angptl6	7.37162	6.08099	8.55366	5.39656	10.3856	5.92791	7.0019	7.0041	10.8259	0.607069	3.65288	5.81805e-10	1.92307e-08
Zfp282	3.11787	4.42798	4.31648	4.35889	3.43457	4.52157	1.80331	3.99211	3.09726	0.596774	4.33648	6.59123e-10	2.15206e-08
Crtc1	4.38569	5.61335	6.99113	5.2753	5.79718	6.17961	6.2209	7.07549	4.50383	-0.639203	5.12699	6.67172e-10	2.16952e-08
Pabpc4	4.38981	4.9942	5.26162	3.74695	4.31788	5.40296	3.01168	5.50695	4.73786	0.626998	3.86724	8.09484e-10	2.58007e-08
Kbtbd7	1.93281	4.61947	2.7112	4.17052	2.22009	4.44747	3.03163	4.45132	2.04231	-0.736483	3.98479	8.34671e-10	2.6327e-08
Atf3	8.11659	1.21683	0.0476571	1.72628	0.0882436	5.31005	0.205223	7.90571	0.612684	1.87406	2.41674	8.35346e-10	2.6327e-08
Gins2	5.21535	5.63086	4.61936	6.60338	4.73884	7.83738	7.00253	6.68842	4.27474	-0.906106	2.67796	8.35831e-10	2.6327e-08
Lgmn	17.9887	3.26588	1.03566	3.76817	0.336598	2.00635	1.22335	3.99652	0.442208	-1.19166	2.68804	9.38977e-10	2.9232e-08
Dot1l	2.33967	3.39985	3.43908	2.99614	3.07125	5.36128	2.35598	4.10301	1.74305	-0.90879	4.26986	9.70593e-10	2.99839e-08
H2-DMb2	7.00165	3.36815	3.21117	6.32275	1.85451	3.28513	3.86557	3.17044	1.79533	-1.20738	1.64483	1.08429e-09	3.29888e-08
Yeats2	8.57766	7.09406	6.81251	6.84229	7.61649	5.94219	6.89512	6.29795	5.04574	-0.605245	5.43822	1.27296e-09	3.81509e-08
Btaf1	2.56367	5.77357	5.59735	6.44686	4.22736	6.74396	3.62539	5.24544	2.70785	-0.70078	5.4356	1.5561e-09	4.57823e-08
Cyp4f16	3.71298	2.67694	3.63894	1.54143	3.18374	1.79307	5.01252	2.3516	3.2204	-0.743169	2.7744	1.70526e-09	4.98059e-08
Dnase2a	3.78269	4.33607	5.53801	4.02932	5.10239	3.66322	6.26041	4.20646	3.92647	-0.715146	2.99377	1.7595e-09	5.1204e-08
Wee1	1.89768	3.87033	5.62083	3.5501	4.74345	4.61463	2.63582	3.82613	4.13627	0.599603	3.83264	1.98412e-09	5.69158e-08
Aven	7.37622	3.65956	4.33511	4.00641	3.04821	2.76449	2.20067	2.11197	3.75831	0.829409	2.41019	2.11858e-09	6.03421e-08
Rnf113a1	9.78181	13.7391	14.6116	13.2858	14.08	11.1271	12.802	12.9248	17.7782	0.615653	3.99606	2.19917e-09	6.21963e-08
Btbd7	3.42099	5.81518	4.02168	5.77978	3.52095	4.27152	3.37272	3.61458	2.3711	-0.725371	4.19475	2.61218e-09	7.18528e-08
Mdm4	20.695	11.541	11.1445	12.6391	12.2711	10.3537	12.4893	13.5085	9.27683	-0.587791	5.5109	3.60987e-09	9.60083e-08
Mcur1	2.22295	4.30549	3.42343	3.76886	2.86607	4.24712	1.95667	3.55133	2.96729	0.668401	3.91393	3.68558e-09	9.76982e-08
Csrnp1	62.4314	14.2172	9.06565	14.381	12.0726	20.3807	11.6942	16.9092	8.59901	-0.620456	5.69018	3.87137e-09	1.0195e-07
Cd151	1.87981	3.76666	8.23613	3.85501	3.22204	4.20501	3.51287	3.00467	5.2435	0.691255	3.09058	3.89958e-09	1.02128e-07
Dennd5a	4.0858	9.88065	6.05376	10.0894	4.65395	9.17419	4.61403	9.59418	3.25111	-0.617085	5.16331	3.93217e-09	1.02128e-07
Wdr81	5.85037	6.94079	6.89172	6.56025	8.21356	6.1295	7.02737	5.78881	5.52207	-0.687223	5.58851	3.95442e-09	1.02128e-07
Pex11g	3.63168	3.15263	3.10473	2.9097	3.45061	2.61121	5.50441	2.78196	3.16192	-0.825912	1.99841	4.0342e-09	1.03523e-07
Adipor2	2.82869	3.87113	4.07287	3.45709	2.7395	5.13554	2.58671	4.05816	1.784	-0.83007	3.82211	4.50855e-09	1.14597e-07
Cnrip1	7.55846	5.52933	9.19513	4.87734	8.97018	5.11651	10.9016	5.15738	7.20867	-0.609914	3.54157	4.58407e-09	1.15784e-07
Atp2b4	3.24947	5.21029	3.09035	5.63766	2.51123	5.79104	3.51432	5.31437	2.5929	-0.622451	5.16359	5.50925e-09	1.36575e-07
Tsacc	6.76647	2.71952	3.25139	3.39006	5.40549	2.96495	7.08363	3.4949	3.60696	-1.08914	1.13143	5.66541e-09	1.40014e-07
Mlxip	4.86536	8.30534	7.73968	8.78855	6.45606	8.66352	5.74082	7.44889	4.33797	-0.617597	5.74733	7.07996e-09	1.73373e-07
Usp12	3.43688	5.55911	3.53586	6.78367	3.84922	5.3321	3.91446	4.81098	2.79884	-0.682005	4.33331	7.40994e-09	1.80902e-07
Kdm4a	8.26019	11.0329	6.24348	10.6686	9.11678	8.33685	9.04482	8.99859	6.93591	-0.625856	5.40766	9.44717e-09	2.24496e-07
Mccc2	6.63896	4.72959	6.69602	3.19722	7.26573	3.4132	4.48187	4.65126	6.83325	0.58502	3.55448	9.59925e-09	2.27437e-07
Tnfrsf12a	6.01744	3.95002	3.3978	4.73014	4.96072	5.73099	4.5178	4.70626	6.88947	0.773215	2.33553	1.01043e-08	2.387e-07
Camk2b	3.59267	2.60066	5.63291	2.45432	5.24248	1.54943	5.17965	2.07755	3.73414	-0.637568	3.92675	1.01569e-08	2.39237e-07
Hip1	5.6692	5.54011	4.47821	5.09012	4.46325	4.52359	4.44497	4.99228	3.34604	-0.596418	5.28282	1.0773e-08	2.527e-07
Spin2c	6.08807	1.41688	2.92944	1.35271	2.72083	5.55966	7.17419	8.35216	10.0958	0.633006	2.80577	1.09069e-08	2.54663e-07
Zfp457	0.869763	1.67725	3.31992	1.62789	1.44437	0.890223	2.71022	1.56046	2.10533	-1.14488	2.04959	1.10497e-08	2.5725e-07
Ppp2cb	6.60112	6.28459	7.54739	6.55146	5.26776	5.40075	5.11881	6.40187	7.30137	0.633164	3.59556	1.19262e-08	2.75263e-07
Reep3	3.19874	5.60385	5.78377	5.71327	4.39763	7.30831	4.91228	6.13151	3.75709	-0.664182	4.9459	1.25189e-08	2.86472e-07
Zfp607	4.24313	6.42091	4.28977	6.03612	4.91348	5.92378	6.1006	6.39306	4.36088	-0.598538	4.32996	1.38201e-08	3.13569e-07
Ift172	2.46632	1.77558	2.89944	1.84377	3.02698	1.30967	3.98064	1.75583	2.96915	-0.655516	3.81827	1.49349e-08	3.35854e-07
Utp20	4.29876	2.53253	4.28302	2.29023	3.64028	4.57943	3.19392	4.89462	2.60856	-0.7453	5.06179	1.50554e-08	3.36838e-07
Dirc2	1.86257	4.63032	5.48167	4.55303	3.36334	3.36468	1.46807	1.87742	2.28033	0.614085	3.96234	1.59178e-08	3.53182e-07
Tmem8	5.96735	8.62645	13.2914	9.19047	10.3271	8.61025	7.11853	6.36568	5.2022	-0.619539	4.93206	1.59635e-08	3.5322e-07
Lmna	17.1991	11.3135	0.67748	12.331	1.26119	10.0538	1.31947	10.5342	0.759744	-0.988565	4.4799	1.61252e-08	3.55817e-07
Dusp14	2.0535	3.50965	2.25933	2.48772	2.25565	6.22501	2.40999	6.38305	3.82033	0.791503	2.41898	1.74288e-08	3.81439e-07
Mycbp	10.6574	11.1712	8.83216	10.2048	7.83851	10.7502	6.54223	9.87241	9.52263	0.605038	3.8734	1.88582e-08	4.08273e-07
Clec4n	14.67	1.83321	0.0528469	2.37953	0.149069	2.53806	0.0986682	1.97096	0.445209	2.59739	1.5695	2.16095e-08	4.61616e-07
Pex26	6.0696	5.32058	4.22121	5.85808	5.96212	4.33616	5.56811	4.45816	4.01394	-0.594723	4.44419	2.34509e-08	4.95678e-07
Serpina3f	7.82325	1.42007	0.353581	1.89891	0.750059	3.24317	0.751389	4.11064	1.51695	1.04576	2.38088	2.62316e-08	5.51863e-07
Zfp821	3.75278	4.53103	3.06616	4.60909	3.27006	5.63734	2.87115	3.88751	1.92882	-0.934968	3.0672	2.62464e-08	5.51863e-07
Zyg11b	3.00988	5.74927	4.5377	5.07967	4.39778	3.58969	4.49058	4.26231	3.45755	-0.586621	5.60725	3.05399e-08	6.38794e-07
Lrsam1	3.38155	5.02479	4.65819	6.00607	5.89668	3.36004	4.02786	3.6818	2.9923	-0.693588	4.19325	3.30048e-08	6.86774e-07
Rfxap	9.02916	16.9093	20.5923	14.6843	14.8897	15.9421	8.03019	10.4987	5.68085	-0.595015	4.88443	3.94724e-08	8.06724e-07
Rpp38	8.47547	7.20633	12.8653	8.31749	12.3129	12.6571	8.12551	12.566	11.5908	0.628565	3.51218	4.25628e-08	8.67676e-07
Msantd2	2.88065	4.87187	4.15301	4.29739	3.52371	4.30526	3.12554	3.12207	2.12731	-0.854	3.12588	4.65204e-08	9.41188e-07
Nthl1	4.93246	3.44535	5.71209	3.20123	4.79217	2.9523	4.97762	2.78248	3.02591	-0.902159	2.18152	4.9966e-08	1.00556e-06
Dusp4	1.84477	0.704623	0.305779	0.952873	0.314492	5.86517	0.390804	4.89112	0.86328	1.27674	2.17353	6.22728e-08	1.22292e-06
Cenpj	5.53455	5.60799	3.44209	5.43335	3.30175	4.91264	4.94842	5.68532	3.62135	-0.589268	4.42127	6.39169e-08	1.25215e-06
Fam173b	16.1098	8.32331	11.4188	7.93223	9.68027	9.41499	8.98541	9.1849	12.3987	0.595703	3.64414	6.81857e-08	1.32665e-06
Plekha5	3.63536	4.46577	4.07994	3.74198	4.43927	3.40619	4.11315	3.81988	3.02571	-0.594099	4.3833	6.92757e-08	1.34078e-06
Yrdc	5.00591	8.02092	7.44961	5.70418	5.15125	9.45501	2.32889	6.18323	3.54857	0.774626	3.26903	7.14766e-08	1.38005e-06
Rwdd2b	7.4785	3.9066	6.26474	4.41962	5.73403	4.23988	5.11383	5.64436	7.00429	0.590748	3.60088	1.13396e-07	2.0842e-06
Cd200r4	11.1626	5.90333	9.46148	6.16869	7.98997	4.55869	5.74939	5.69409	7.93786	0.60055	3.66341	1.19225e-07	2.18136e-06
Strn	3.90589	5.44116	5.61141	6.04093	4.29114	4.40456	3.30617	5.48485	2.47395	-0.682852	4.25597	1.25542e-07	2.27857e-06
Nme6	9.71793	6.75042	11.7718	6.60335	11.2582	7.14196	9.98597	7.45585	13.7045	0.599944	3.34301	1.37843e-07	2.47686e-06
Hyls1	3.17204	3.9126	4.08194	3.53461	3.31401	3.43109	4.22827	3.35783	2.97256	-0.801839	2.63466	1.52259e-07	2.68779e-06
Tmem260	3.9757	3.84597	5.20339	3.79938	4.98849	4.11392	4.29808	2.62929	3.32889	-0.632209	4.47185	1.61178e-07	2.83278e-06
S100pbp	6.33674	7.80169	5.11719	7.63265	5.90972	5.99356	7.9195	8.63456	5.69757	-0.670955	3.47052	1.64724e-07	2.88878e-06
Fam109a	3.05807	4.27511	4.84106	6.08841	3.91442	4.60788	4.0309	4.40606	2.89662	-0.746773	3.39286	1.67265e-07	2.92695e-06
Bora	4.1813	4.39775	4.77468	3.63172	3.73839	4.6455	4.25029	5.07121	5.73404	0.590108	3.44252	1.81746e-07	3.13933e-06
Scrn2	7.37567	3.32422	3.93881	3.40669	5.91494	3.19752	4.38843	4.28986	6.14097	0.673146	2.87036	1.86544e-07	3.21528e-06
Igj	12.1772	6.76394	0.738834	6.77853	0.543096	4.97782	0.833214	7.47204	1.35462	1.03133	3.25192	2.24755e-07	3.83277e-06
Uxs1	6.89752	9.11047	7.91437	8.22576	7.5555	11.6115	9.03139	9.90497	6.35691	-0.636333	3.50241	2.95272e-07	4.85988e-06
Ttll5	4.5864	3.25575	4.2685	3.7562	4.61903	2.07926	3.64868	2.9723	2.75595	-0.620023	4.17007	3.16696e-07	5.17013e-06
Tmem164	6.44255	8.96033	6.65335	8.28135	7.20031	9.34	7.77203	9.45255	6.28796	-0.608917	5.47654	3.28739e-07	5.31274e-06
Ppwd1	3.37793	3.88536	3.70988	3.2539	3.3113	4.3141	2.8481	3.40292	4.14227	0.625671	3.15695	4.90688e-07	7.6085e-06
Tmem45b	1.36228	1.99536	3.19075	2.0316	2.16291	1.71007	3.57086	1.76727	2.68904	-0.860853	1.94902	5.441e-07	8.38812e-06
Crb3	3.56327	4.40887	4.12884	3.2346	3.06494	4.51391	3.34468	3.06766	5.09198	0.672105	2.21823	8.96282e-07	1.31608e-05
Rap1gap2	11.0865	2.52944	1.76888	2.56229	2.2874	1.46219	3.21686	1.52026	2.65525	-0.664897	4.30695	9.74252e-07	1.42018e-05
Immp2l	4.61444	1.58295	4.28939	1.66362	3.75465	1.991	2.58715	1.4075	3.86072	0.838431	1.77693	1.0349e-06	1.50042e-05
Fabp5	4.7991	3.16723	1.27479	1.68409	1.72978	4.99065	2.45586	5.22635	3.90316	0.839324	1.67584	1.03777e-06	1.50186e-05
C1qb	95.9668	4.32939	0.141986	5.29704	0.380392	6.12902	0.0897355	6.09582	0.439838	2.55212	3.46192	1.04511e-06	1.50706e-05
Cd99l2	4.8498	4.96661	5.21047	4.07898	6.04898	4.00362	5.58647	3.00047	4.45808	-0.621098	4.15363	1.11904e-06	1.5965e-05
Zc3h4	7.04182	5.98361	6.53723	5.91987	6.5074	5.59333	6.08064	6.26058	5.15649	-0.616555	5.28545	1.20532e-06	1.69845e-05
Btg3	5.33843	7.60522	6.08467	5.97678	5.14638	8.40213	2.81577	6.016	4.33077	0.644371	3.067	1.25594e-06	1.7605e-05
Phlda1	14.8544	4.19307	1.62293	4.52538	2.18091	11.1849	2.78703	10.1216	1.77953	-0.717324	3.48997	1.42091e-06	1.96772e-05
Piga	7.16053	4.59362	3.36055	4.9326	3.78783	4.32681	4.65428	4.75319	3.58314	-0.590108	4.07604	1.51187e-06	2.06519e-05
Csf1	6.40009	3.59857	1.12019	4.49618	1.80334	7.48533	1.35299	7.43135	1.88434	0.628632	4.08255	1.54368e-06	2.0921e-05
Mgst3	13.4443	14.8829	10.5885	12.2361	13.8212	9.16411	15.2679	10.4227	10.7066	-0.619398	3.02639	1.6316e-06	2.19883e-05
Fbxl15	4.96265	5.52872	6.67107	5.39512	7.79895	7.6093	3.45064	6.20402	5.34715	0.588137	3.06981	2.39143e-06	3.05859e-05
Mtcp1	4.06839	4.91963	7.14381	3.70366	6.59017	4.53127	7.0385	4.38208	5.24464	-0.608468	3.17093	2.45135e-06	3.12033e-05
Insl3	22.0646	10.3657	13.7979	10.6623	10.8526	11.4016	12.2434	10.2714	8.58715	-0.68401	2.87888	3.01988e-06	3.72591e-05
Supt3	9.17971	5.93687	5.41433	7.46638	6.62281	6.42643	7.7188	6.90122	5.64692	-0.585225	3.38346	3.09755e-06	3.79985e-05
Siah1b	1.60347	4.09704	2.15142	3.87644	3.28	4.30572	2.83946	4.16053	1.81908	-0.737869	2.5152	3.26971e-06	3.97312e-05
Fam166a	6.22739	4.47904	3.08366	3.91573	3.7722	4.74365	4.53844	4.07058	6.25798	0.617029	2.41588	3.4238e-06	4.11817e-05
Srxn1	2.43299	3.7261	3.32322	4.16647	3.0795	5.9916	2.50177	4.57102	3.37949	0.593399	3.4632	3.59154e-06	4.28636e-05
Proser1	4.09269	6.42627	4.24308	5.72846	4.79761	5.87938	4.1449	5.68684	3.34522	-0.599906	4.48739	3.62684e-06	4.31567e-05
Coq7	9.00542	4.00028	3.46149	4.61453	6.48623	5.21158	5.73625	6.22758	8.23853	0.611773	2.4014	5.02043e-06	5.76058e-05
Notch2	3.89053	4.56271	3.94222	4.68098	4.15632	2.87016	3.0581	3.72066	2.6867	-0.629004	5.36418	5.98321e-06	6.7307e-05
Gtse1	2.04396	3.3789	2.64782	5.19988	2.10131	3.2142	1.81117	2.9469	2.60238	0.625764	3.06532	6.8804e-06	7.6542e-05
Fcgr3	14.2725	3.57441	1.47932	4.281	1.87882	2.79258	1.68504	3.07906	0.884372	-0.931188	2.27314	7.13313e-06	7.88079e-05
Pkig	6.06905	5.80472	4.75549	5.80276	2.56436	6.22098	1.73565	5.36047	2.94841	0.843125	2.45495	8.48696e-06	9.12547e-05
Ptms	3.83467	5.53195	4.65641	5.14642	4.23688	7.55423	2.97555	6.95634	4.42883	0.64471	2.62418	9.04494e-06	9.64794e-05
Ssh1	5.87616	8.15406	4.38878	8.79405	5.45659	6.16139	5.06749	6.38208	4.18155	-0.586349	4.33677	1.24394e-05	0.000127603
Tcp11	3.48289	5.44518	2.70798	4.71107	1.83806	3.37995	1.6799	4.41757	1.15988	-0.982275	2.73883	1.33473e-05	0.000135704
Trim65	4.43995	4.19602	4.42713	4.42504	4.48546	4.02824	3.04594	3.46274	2.46634	-0.652932	3.63017	1.47033e-05	0.000147436
Ralgds	1.71612	7.12091	4.41091	5.27762	1.83469	4.62924	1.7627	3.12632	1.30195	-0.678925	3.79174	1.51407e-05	0.000151445
Acn9	9.13409	4.21125	4.41645	3.71004	5.75982	7.44719	9.78874	3.42923	6.95301	-0.700679	1.79525	1.9782e-05	0.000191202
Etnk1	3.79152	5.72002	6.09071	5.33345	4.0259	4.79131	3.07495	3.79438	2.70232	-0.613399	4.89286	4.08451e-05	0.000360514
C1qc	89.3136	4.97103	0.188091	4.82683	0.336125	6.15341	0.388077	6.24436	0.0690601	-2.1096	3.3784	4.58051e-05	0.000398598
Trf	63.2752	5.00119	0.358481	7.4862	0.735096	5.3775	0.325159	4.90955	0.110533	-1.4883	4.20834	4.97765e-05	0.000425777
Ccdc28b	2.51105	6.61752	2.14357	5.34414	3.36031	4.88167	3.57925	3.93034	5.09383	0.644528	1.91013	5.24028e-05	0.000443186
Cd209c	2.24832	2.92898	3.99787	2.66022	3.63196	2.21764	4.88158	2.53192	4.28374	-0.670499	2.44158	5.75724e-05	0.000478202
Bloc1s3	1.48478	6.7351	6.11491	4.84163	2.88608	5.76659	3.00425	3.77896	2.30311	-0.678781	3.01655	6.28451e-05	0.000516655
Timp2	0.765729	3.93605	0.804333	3.66091	0.475188	3.0834	0.866232	1.86114	0.693867	-0.985718	2.78214	9.48568e-05	0.000734706
Hspa1b	202.314	5.42959	0.160172	5.42741	1.08551	4.72252	0.17067	5.39005	0.373626	1.16895	5.7205	0.000108741	0.000830238
Gem	18.5894	2.02271	0.511698	2.42638	1.09792	5.40922	2.17557	5.97562	1.59089	-0.622896	3.18566	0.00016908	0.00121798
Rarres2	6.93516	3.40445	8.35075	3.70759	6.04973	3.74011	8.01991	4.3622	6.03839	-0.603184	2.07454	0.000200694	0.00140661
Ppapdc1b	2.09381	5.37369	3.25856	4.6172	2.7025	4.57908	3.26995	5.28907	2.56569	-0.633832	2.5536	0.000270275	0.00182716
Fam195a	5.80862	2.86046	5.4544	2.79217	5.10559	4.3713	2.64142	4.76904	3.82767	0.685128	1.83933	0.000280103	0.00187952
Ly6d	6.60128	3.65128	3.47973	3.94388	3.58949	3.00889	4.63208	4.60444	3.11445	-0.635666	1.58685	0.000398691	0.00250374
Zfp81	5.56328	3.28351	4.35621	4.39482	3.48992	3.72489	3.44037	3.4593	2.958	-0.627496	3.16418	0.000452685	0.0027926
Tmem107	7.09418	4.20091	5.22434	3.64576	4.34311	3.7053	2.93148	3.38312	2.16467	-0.607074	2.40945	0.000976634	0.00531992
Ctxn1	2.39418	4.42801	2.2259	5.23008	2.69088	3.93635	1.60365	4.24155	2.11215	0.645127	2.07913	0.00148029	0.00755615
Egr3	0.0610119	0.295733	0.179848	1.41049	0.344149	6.64101	1.42766	5.23161	0.93131	-0.688429	1.52756	0.00181008	0.00892485
Tnfrsf14	1.62386	3.00935	2.2053	3.11449	2.55441	2.39716	3.5736	3.25777	3.37104	-0.800389	1.40399	0.00305284	0.013791
Uhmk1	1.44272	4.54061	2.84238	4.71031	2.13353	3.94061	0.910552	2.70952	0.800721	-0.709484	2.54263	0.0136817	0.0458454
