# Supplementary material for: Thymic stromal lymphopoietin limits primary and recall CD8+ T-cell anti-viral responses
Source: eLife. 2021 Jan 13;10:e61912. doi: 10.7554/eLife.61912 (PMC7806261; doi:10.7554/eLife.61912)
Supplement: Supplementary file 3. — Related to Figure 3C–E. [file elife-61912-supp3.xlsx]

## Sheet: naïve vs. memory, union genes 
symbol	naive.media.24h	naive.TSLP.24h	memory.media.24h	memory.TSLP.24h
Bcl2	8.3815	35.2649	10.967	39.3012
Sh3bp1	36.785	73.4853	55.9908	83.1356
Pik3r5	52.6198	85.7001	43.2842	63.9064
Socs3	22.4031	41.7939	15.947	25.0154
Igfbp4	2.55375	9.57363	0.533196	1.05812
Itgb3	6.89871	12.5334	0.886875	2.64986
Pim2	21.1479	37.4654	41.5039	61.9927
Tfrc	7.03785	11.7916	2.01073	3.56075
Tha1	8.30387	12.8795	8.04139	8.7972
Smo	0.995599	2.08373	0.035989	0.014089
Rpusd3	2.03795	4.4488	11.3673	11.9977
Tesc	0.539826	2.30097	3.02614	3.63553
Pole2	3.52583	5.6905	4.15072	6.24694
Cyb561d2	3.85561	5.98389	27.9471	28.4143
Jmjd7	3.30293	5.79799	12.5272	12.0755
Ldlr	0.498906	1.08884	0.703818	0.753885
Mtx2	3.1141	5.72616	17.1485	16.7285
Ydjc	0.703593	1.80315	3.16124	3.41883
Rad51	0.184221	0.648022	1.75189	1.80866
Slc29a2	0.315411	0.88244	1.23509	2.2131
Galk1	3.29424	4.91419	16.7357	17.9308
Insl6	1.07122	2.68371	26.8752	30.4277
Pard6a	1.41038	2.65083	5.64764	8.14552
Phlda1	0.140313	0.496598	1.62293	2.18091
Dusp4	0.101228	0.345527	0.305779	0.314492
Nme6	1.85556	3.3443	11.7718	11.2582
Bag2	0.490551	0.977037	2.77516	2.62072
Tmed1	0.499463	1.07233	19.7048	19.4842
Aurkb	0.0984558	0.279253	0.653834	0.79768
Car12	0.0771743	0.211524	0.154595	0.289762
Cdca8	0.256533	0.556885	2.61401	2.1381
Tmbim1	0.114833	0.290116	13.4571	16.9667
Dtl	0.0228149	0.0940527	0.226856	0.256823
Pecr	0.65505	1.16432	6.777	6.29913
Phlda3	0.0470721	0.20626	2.09095	1.90264
Rnf157	1.58834	1.61431	0.571039	0.476026
Pdcd1lg2	0.0412173	0.128057	0.078361	0.130384
Psrc1	0.0637275	0.196455	0.221741	0.273419
Mcm10	0.00406509	0.0422851	0.0988693	0.238543
Nek6	0.0131607	0.0722493	2.33622	3.5248
Zfp457	153.403	14.7639	3.31992	1.44437
Trim36	40.3612	3.72406	5.02101	3.28757
Nmrk2	27.9537	2.25721	0.396653	0.564466
Gdf3	26.483	2.20225	0.582145	0.63562
Grk1	48.253	5.47778	2.12764	1.70832
Ttc26	20.3477	1.81422	0.272889	0.458548
Omd	35.7891	2.89723	1.95621	2.10335
Ufl1	91.6509	12.0853	14.9404	15.5154
Veph1	44.6131	5.05602	1.71998	1.12735
Zfp300	63.4596	7.11004	2.8604	2.76866
Nanog	30.3432	2.58164	1.32135	1.37326
Lars2	1402.03	203.658	2713.22	2372.56
Kdelc2	23.0381	2.14711	1.55379	1.66928
Usp17la	35.3333	3.4434	1.4913	0.940168
Il2ra	43.565	5.04842	4.3191	3.46962
Kif15	11.2908	1.11064	1.787	1.54976
Ap1s3	86.915	12.7333	5.45735	3.93796
Slc18b1	23.3179	2.7125	1.24376	1.16023
Nsl1	21.8617	2.64427	1.78048	2.5821
Smco1	49.2824	6.01406	1.57394	2.34306
Ccl9	16.4261	1.94324	4.85214	4.0431
Gal3st3	23.291	3.06731	1.34219	0.918787
Gjc3	19.0778	2.58525	2.48286	1.60476
Cd300a	18.7419	2.59272	1.65825	1.56357
Mmachc	34.2504	5.02622	4.4317	4.8721
Bard1	18.6365	2.854	0.252051	0.223803
Tnfrsf10b	54.7857	9.32866	4.07269	3.73134
Zfp488	91.6548	18.9203	25.4865	16.5517
Neu3	18.8821	3.17927	3.49733	2.44603
Uevld	26.8762	6.13644	2.11074	3.1379
Supt7l	42.4579	9.88355	10.4365	9.16984
Mplkip	42.1399	10.1229	19.0864	17.2171
Mrpl35	21.5112	4.93959	8.86737	9.60326
Mbd4	23.1347	5.72712	5.01989	5.47829
Ube3a	47.0015	15.813	22.0996	20.2405
Cpox	30.9229	8.80031	7.45314	5.02322
Zmat3	17.7036	5.45668	1.3381	1.22279
Reep3	33.6375	11.002	5.78377	4.39763
St3gal1	82.2238	38.0381	4.0585	3.54077
Glrx2	30.2532	10.2601	8.24426	8.27458
Tmem206	17.254	4.56451	12.5844	12.5204
Cd274	27.5305	8.89502	9.59149	9.03408
Gje1	25.4015	3.12036	1.29467	1.165
Ldlrad2	16.1735	1.70191	0.990385	0.658053
Sumf2	36.4016	11.3862	14.2678	15.5663
Obox3	19.0128	2.09654	0.818432	0.250747
D17H6S53E	35.7939	11.7734	1.74267	2.20552
Zfp113	16.2188	6.46616	4.99388	5.25734
Zfp953	9.41421	3.11061	1.22235	1.23161
Slc35e2	21.2776	11.0187	4.28447	5.0951
Pycr1	5.44951	0.472058	0.160512	0.336414
2020-03-05	22.6335	10.3362	12.9123	9.25336
Timmdc1	24.7304	8.91062	3.05142	3.03822
Ulk3	51.4658	26.6201	29.4385	29.4559
Tstd2	25.7988	12.5111	14.7269	14.6294
Birc5	5.98875	0.954235	0.615696	0.703009
Cwc25	26.585	12.3122	15.147	16.9375
AI597468	12.1032	4.48893	4.17725	4.2577
Hbb-b1	12.6317	0.188662	0.600891	1.66932
Hbb-bs	12.4735	0.1863	0.618307	1.64842
Gmeb1	17.4609	9.10051	2.91441	2.31054
Plin3	38.879	18.9471	37.2192	45.4676
Abi2	7.18186	3.18595	24.0657	27.3633
Polr1b	21.4975	10.0805	8.87362	12.5674
Zfp882	8.1314	3.35891	2.07021	1.63905
Trmt10a	7.7598	2.42009	2.41867	2.16948
Osbpl8	29.1975	18.5394	5.5748	5.46985
Ahnak	10.8723	7.49188	29.6955	28.8878
Prdm9	11.7501	5.02025	1.4629	1.91604
Zfp26	10.0735	5.75249	3.34706	2.89173
Cd74	19.067	11.265	39.6809	48.8482
Hba-a1	11.7991	0.685434	2.07406	2.95727
Hba-a2	11.7153	0.680564	2.05932	2.93626
Ppm1k	16.6147	8.72549	5.95887	4.65718
Sco1	8.31174	3.01564	4.479	3.95137
Sgk3	12.3527	6.42728	2.80039	3.6288
Mkl2	10.1649	5.52324	4.26019	3.47354
Dqx1	17.7177	8.29816	1.03836	1.75633
Tspan31	21.5449	9.04516	84.2716	81.4535
Rfxank	20.0305	10.9179	25.9514	30.0484
Rad1	34.3663	15.8571	45.0289	49.9296
Trub1	13.0649	6.50343	2.83929	4.17583
Ppp1r16b	16.1063	9.82931	10.2493	10.4757
Sfxn2	16.0387	7.59778	3.90702	6.99693
Carf	10.2827	5.39319	1.82421	1.71647
Bloc1s3	23.1581	10.5218	6.11491	2.88608
Bpnt1	18.4839	8.5766	10.2198	9.72465
Zbtb8a	14.4135	6.49821	13.0786	13.9456
Mzt1	25.4272	14.5221	22.1601	22.7349
Slc8b1	14.4311	6.9569	11.0847	13.7872
Zfp799	9.47379	4.96482	2.0302	1.99204
Zbtb6	9.50621	5.35428	1.11009	1.68624
Olfr613	6.62847	3.43568	7.70037	5.5157
Arsb	15.3566	10.2486	7.17385	7.61296
Tmem69	15.8961	8.61211	7.27984	7.23591
Alcam	1.10626	0.167843	3.07779	1.70644
Med18	14.4292	6.35293	15.5987	17.8643
Slc25a42	13.7984	7.86873	4.13197	5.70092
Ppih	10.2565	4.75505	7.50672	6.58783
H2-Eb1	5.02244	2.6951	3.83745	3.14481
Gdpgp1	8.28441	4.02004	7.72782	9.13609
Ube2v2	5.56889	3.31629	11.207	10.7298
H2-Aa	9.09381	5.29573	6.19776	6.9628
Tex9	5.43699	2.78598	3.01611	2.99237
Xrcc2	4.46489	1.81135	2.34791	2.44086
Gtpbp3	10.8921	6.30458	5.17271	4.01034
Plek	2.21537	0.843269	26.5874	27.3653
Kcnip2	9.94131	6.16456	16.9842	16.9867
Tnfrsf21	1.55258	0.25582	0.113625	0.0767955
Dnase2a	8.53673	3.94448	5.53801	5.10239
Cxcr2	6.63179	3.73038	5.03389	4.03523
St8sia6	8.62683	6.19252	2.31232	1.12979
Fasl	1.47345	0.313957	65.3463	77.0472
Xcl1	8.09878	2.01066	13.6484	17.0675
Cd79a	7.07544	5.05119	6.05981	7.76228
H2-Ab1	5.41324	3.41686	9.70985	15.7262
Tigit	3.72146	1.30077	11.7073	9.51893
Irf8	1.27664	0.743405	2.38582	2.97845
Cxcr3	6.60509	4.41953	611.04	608.015
Bcat1	0.316934	0.074819	0.215552	0.160901
Tbx21	1.9033	0.877966	85.3913	87.7165
Klrk1	3.13213	2.04241	184.53	181.786
Plk2	0.852825	0.160071	0.0443445	0.160695
Gzma	11.1826	7.45613	61.4478	63.2888
Nr4a2	0.971763	0.329159	0.946492	0.699774
Ncs1	0.374725	0.0310534	0.170618	0.0342345
Fitm2	4.5872	2.40251	2.5874	2.46333
Phactr2	0.238217	0.0816753	0.461419	0.475852
Rasgef1b	1.1412	0.435795	0.691917	0.687936
Cd163l1	3.11057	2.5895	0.140711	0.118213
Ly6a	8.03355	5.58819	593.733	587.866
Snx10	2.60909	1.78111	17.2976	17.4483
Slamf7	0.671497	0.268835	13.3637	13.5645
Kit	1.03939	0.558748	0.208935	0.106342
Litaf	1.0989	0.511426	29.2553	22.8555
Lipg	0.268299	0.0249589	0.0089576	0.0171981
Fcer1g	3.96637	1.99937	1.5762	3.56462
Coro2a	1.63419	1.25433	22.1907	28.3221
Cenpk	1.06035	0.263432	1.95201	1.35061
Serf1	2.86727	1.09175	2.91507	2.87073
Nrn1	0.699124	0.178356	0.128759	0.228727
Ccl4	2.58729	1.01648	103.67	100.945
Bhlhe40	0.626891	0.367331	44.7243	42.9124
S100a6	5.50541	3.09858	516.182	581.104
Gadd45g	1.42176	0.489512	1.82461	3.01665
Frmd4b	0.646226	0.386448	2.84106	3.3536
Atf3	0.514846	0.116727	0.0476571	0.0882436
Nr4a3	1.54748	0.924759	0.0377396	0.106249
Sema7a	0.442306	0.167961	0.0433545	0.0154817
Bcl2l2	1.29673	0.994521	0.860803	0.56828
Cth	0.422688	0.0491423	0.00215653	0.00647476
Nfil3	1.65494	1.18652	6.46555	3.71157
Cd160	0.505145	0.280058	2.84993	3.68336
Rbpms2	0.380257	0.173963	0.00741586	0.00731774
Rgs16	0.754032	0.350536	2.33698	2.25491
Hspa1b	0.189123	0.0312877	0.160172	1.08551
Chst2	0.197944	0.0725905	0.0545958	0.0375273
Ramp3	0.847481	0.386528	0.114779	0.139663
Lag3	0.844037	0.350876	3.54584	2.99152
Lif	0.274122	0.0761892	0.0830145	0.016222
Asns	0.268384	0.0982438	17.5864	24.1251
Gpt2	0.397547	0.226836	0.725441	1.1998
Ifitm2	1.10432	0.44993	21.5816	24.4545
Ccl3	1.62765	0.781737	30.7814	30.7145
Casp4	0.734438	0.376143	3.95291	4.94236
Gp49a	0.872462	0.465125	17.475	23.2852
Spry1	0.344161	0.168573	0.147793	0.204225
Tbkbp1	0.242961	0.116195	0.507149	0.302868
Vcam1	0.0363303	0.00147423	0.0355313	0.202475
Isg15	2.0976	1.5857	2.92073	5.10783
Hk2	0.193004	0.128084	0.272813	0.709884
Cep55	0.276822	0.132467	1.49177	0.524245
Socs2	0.464441	0.226046	1.02792	2.77551
Chac1	0.332149	0.11546	0.784145	2.13749
Cd83	0.39163	0.301551	1.37832	0.995333
Ly6k	1.41473	0.939532	3.72467	2.70984
Pik3ap1	0.582615	0.486665	12.6986	14.5993
Dgat2	0.301439	0.156774	0.131494	0.238129
Ccl6	0.0483059	1.24131	2.1752	18.6146
Slpi	0.356393	0.986916	0.37424	5.74614
Sesn2	1.54943	2.01459	2.18586	5.79092
Hdc	0.0821184	0.270659	0.597484	2.26615
Cep152	6.35147	5.77038	3.23657	6.84776
Slc12a9	5.72035	6.75783	2.86947	6.55358
Gvin1	10.3599	13.3797	11.397	22.3932
F2rl2	0.0580029	0.0270178	0.922341	2.75538
Uhrf1	0.88653	0.548411	0.464714	1.5184
Pelp1	8.21319	9.57165	6.05414	11.7974
Trpm4	2.47654	2.84419	2.17743	4.4793
Gbp5	5.1257	4.83898	2.24074	4.86034
Incenp	10.6747	10.7345	8.56383	15.802
Rab27a	17.0924	18.8731	10.1813	18.8008
Lilrb4	0.626689	0.617448	9.03613	17.738
Zfp39	6.60975	6.00512	5.06266	9.23696
Hspa1a	0.0667872	0.0249566	0.172245	0.817613
Tnfsf8	7.62569	12.2441	2.58085	5.35478
Parp10	15.6277	16.3416	13.093	23.0862
Pak4	2.52864	2.83647	2.41115	4.87103
Pex10	3.73073	3.79939	3.88017	7.97836
Gatsl2	5.65963	5.76131	3.19971	5.82056
Sh3bp2	0.941751	1.32919	1.71777	3.67625
Edc4	21.3958	23.4731	38.523	65.4191
Fus	91.8774	91.0079	20.6342	34.9584
Pik3cd	182.367	254.673	116.924	192.274
BC053749	5.49963	6.1972	2.5827	4.98407
Abcd1	15.2779	17.6753	10.5717	17.8892
Plk3	2.78528	3.09673	1.30232	2.70459
Fam98a	9.63004	11.3569	5.98858	10.5381
Zfp664	21.3715	22.8719	4.65311	8.01507
B4galt5	8.43742	9.07202	7.258	12.3093
Prpf19	11.7012	12.8719	8.81311	14.6061
Aff1	18.2429	19.1414	2.65016	4.40236
Snap29	13.2849	13.3183	7.49511	12.469
Mcpt8	0.322218	0.362996	3.85661	8.26712
Sec14l1	8.0984	8.54033	4.63656	7.68651
Zfp513	10.3729	12.1728	6.92471	11.984
Tango6	2.51462	3.19544	5.02529	8.55084
Usp20	7.10222	8.60634	16.0113	25.7049
Cyp51	2.12298	2.42929	3.31876	5.62914
Mtm1	1.78905	1.61585	2.11768	3.85407
Aldoc	0.258507	0.34217	3.02264	5.68509
Ikbkap	6.65048	8.06196	6.72651	10.7914
Eya2	16.3644	18.478	15.094	24.4314
Gga1	24.3912	29.2596	30.9271	48.7343
Telo2	4.91807	5.62941	6.51968	10.5125
Eme2	2.70075	4.06605	12.0651	20.103
Abcg3	7.08253	7.24667	4.30096	7.16246
D8Ertd82e	3.61147	4.25978	6.69807	10.4833
Kif3b	10.9844	11.5771	2.66032	4.28244
Fos	0.17673	0.108277	0.362056	1.0678
Nudt13	3.99042	4.53463	3.12191	5.47295
Poli	14.0475	14.9196	10.6333	16.7813
Slc26a6	3.68561	3.24665	3.65815	6.01523
Bcl2l1	2.61443	2.47092	11.238	17.9695
Grwd1	5.33318	7.4255	17.2763	27.1477
Dars2	3.12431	3.13101	5.48481	8.69378
Tldc1	2.78412	2.75611	3.96285	6.50567
Gcsh	3.45357	3.30255	6.12257	10.2418
Ece1	8.51169	9.63013	4.38223	6.86099
Ints3	15.6327	17.4025	6.68472	10.2178
Cd69	6.34652	5.11856	10.0349	15.9977
Axin2	15.1318	16.8972	4.5619	7.22359
Lat2	1.23523	1.4886	3.86269	6.55162
Ipo4	6.11527	7.01108	6.60646	10.2509
Coq7	1.88825	2.11363	3.46149	6.48623
Gpr34	1.12815	2.78053	2.99129	5.04843
Dusp6	3.12205	2.7369	1.01494	1.98221
Enkd1	1.27906	1.24389	1.53778	3.11246
Clcn6	7.84437	9.69661	3.34	5.54756
Cbx2	6.90563	8.94724	2.04301	3.38942
H2-DMa	12.2656	13.2239	8.66094	13.5296
Ehhadh	4.2864	4.37203	4.55298	7.10116
Mlkl	0.0293175	0.0608227	2.6858	4.68816
Cmtr2	1.84479	2.005	3.95101	6.25355
Fosl2	2.51451	2.0765	1.08165	1.82385
Dnajb5	5.36279	4.50598	3.3719	5.64229
Atf7	9.81165	10.2232	3.00482	4.95541
Zfp54	1.02685	1.191	3.59589	5.82095
Txndc16	7.946	7.85486	3.55787	5.49721
Nqo2	1.56733	1.51947	3.00044	4.76132
Nfxl1	5.23467	4.25264	4.28915	6.65721
Taf6l	1.78877	2.54391	3.98531	6.34922
Ubtd1	4.61066	6.92635	3.4708	5.92222
Havcr2	0.0884558	0.0288915	0.590098	1.21357
Nmt2	15.6666	15.8071	2.64763	4.51449
Ddit4	7.42089	7.15402	2.81131	4.97716
Palb2	2.79654	2.57821	2.1454	3.51842
Ficd	3.14552	3.22334	3.93211	6.07795
Plod1	2.81794	2.84614	2.93118	4.59144
Ifi30	5.02788	5.42393	7.69987	11.9919
Lmna	0.369996	0.251773	0.67748	1.26119
Tlr12	16.5403	18.6954	2.14043	3.52477
Tyrobp	5.83043	4.42789	2.28307	4.73759
Cdk20	3.47646	3.12773	4.94224	7.79723
Zfp41	1.49062	1.41766	2.33416	3.62997
Adat3	1.76596	2.78699	6.36488	9.99655
Cdkn1a	0.312392	0.218479	1.24904	2.24722
Lace1	2.74281	2.39712	2.41966	3.80883
Shmt1	0.855045	1.02768	3.15433	4.88847
Lst1	1.82262	3.40283	3.23965	6.37917
Nfe2	0.115514	0.12135	0.848296	1.5673
Evi5l	3.0373	2.257	2.77615	4.55685
Tmsb15b1	7.13591	5.00487	7.15319	11.798
Gem	0.266549	0.21978	0.511698	1.09792
Ctsh	0.779116	0.50029	0.296908	0.789473
Napsa	1.00654	0.470722	2.1137	3.39716
Csf1	0.0485999	0.038195	1.12019	1.80334
Pmm1	9.60513	9.27604	6.04385	8.77078
Scrn2	2.16826	2.69952	3.93881	5.91494
Trf	0.875474	0.470898	0.358481	0.735096
Serpina3f	0.00630143	0.0170398	0.353581	0.750059
Myb	6.7191	6.31646	0.483778	0.870361
Hist1h2bc	1.7932	2.01417	1.84538	3.36142
Snrnp35	3.91682	4.3908	1.98281	3.42409
Siah1b	2.35469	2.2322	2.15142	3.28
H2-Oa	8.86237	11.2065	2.18886	3.52554
Nubpl	3.6839	2.26459	2.59126	3.95086
Gzmm	2.10811	1.3337	2.08652	3.18375
Cenpw	0.930917	0.758392	1.44279	2.18071
Ccdc28b	5.50191	7.24858	2.14357	3.36031
Spata24	1.58536	2.3723	1.75683	2.77897
C1qb	0.0393459	0.0133968	0.141986	0.380392
G0s2	1.43012	2.32373	2.62516	3.44419
Utf1	0.028096	0.028158	0.355882	0.609623
Egr3	1.16026	1.06614	0.179848	0.344149
Clec4n	0.0678814	0.0575014	0.0528469	0.149069
Rab5c	62.3329	74.6061	29.3084	10.7387
Tspan17	0.0543138	0.0334059	4.99789	1.36141
Cotl1	229.702	260.009	571.797	283.305
Emd	23.2815	24.5505	29.692	13.782
Cd151	4.29162	4.70803	8.23613	3.22204
Ralgds	1.12108	1.57896	4.41091	1.83469
Kremen1	12.7272	14.0773	4.33364	2.02822
Fam105b	31.3663	28.3	13.8012	6.91656
Lamp1	49.6355	49.3514	32.386	18.1784
Stk11	52.602	60.9968	14.5915	7.56558
Pnrc1	120.237	114.622	78.7214	45.5513
Trim28	63.7826	72.8704	17.2239	9.75745
Chtf8	60.4584	67.312	28.3246	16.2607
Trappc10	17.9076	20.4569	5.23854	2.83222
D10Jhu81e	21.5697	24.8988	46.2094	26.8553
Atp11c	6.97357	6.48922	4.15633	2.37477
Jund	26.3053	41.3733	23.906	14.0378
Rac1	122.495	127.338	35.5693	20.9091
Cited2	24.0423	23.8624	15.8123	8.88341
Casd1	9.86939	9.82844	7.74987	4.4593
Npm3	34.9394	40.6214	21.2476	11.077
Atp1a1	134.918	151.264	109.864	67.8765
Gfi1	5.85781	6.72844	4.26405	2.16833
Rnf130	17.6893	18.7624	7.5461	3.83914
Dusp2	42.1119	41.6021	33.4499	19.7132
Tnfrsf4	6.35342	7.32429	3.12508	1.1897
F2rl1	21.8903	19.3161	23.7424	14.3692
Tmem57	15.3186	14.7953	12.0075	7.28721
Ssx2ip	1.90526	1.89848	5.4179	3.05044
Tysnd1	8.17396	10.9502	8.87137	5.00902
Glud1	52.1031	56.2402	35.7947	22.1201
Cul3	49.1569	47.2421	10.9487	6.4011
Coq2	14.0371	16.5633	10.2906	5.69579
Klf2	417.067	480.004	87.8451	54.8963
Sun2	187.323	215.363	8.81298	5.33104
Zfp367	2.64051	2.83628	8.4828	5.18465
Runx2	6.00959	4.64346	12.3794	7.6809
Copg2	6.81707	7.30438	11.1777	6.81021
Atmin	8.12468	8.9496	7.55261	4.56068
Alyref	18.8911	23.293	10.173	5.53882
Taf10	53.9577	59.5645	43.284	25.7026
Swsap1	3.42637	3.91799	12.2761	7.25494
Panx1	11.7584	12.8737	28.9924	18.2712
Raly	94.9717	109.494	41.759	26.3832
Selt	53.8021	57.5591	14.4839	9.04414
Chsy1	6.30234	5.37395	8.28391	4.98981
Bnip1	7.85413	7.68583	17.4617	10.3481
Ppp3cc	30.0047	30.9034	42.3287	27.0685
Nsmce4a	58.2659	51.6001	52.6712	33.3665
Calm3	47.4815	55.6159	56.132	36.4951
Tsc22d1	8.77491	7.65557	31.4798	20.6777
Akirin2	20.2345	20.1606	5.91177	3.19202
Dirc2	11.7216	13.1766	5.48167	3.36334
Pgp	7.52759	11.8091	39.1169	24.7592
Faf1	8.46268	8.19149	6.19429	3.80092
Mrps30	14.8247	18.333	29.8128	18.9691
Ubald2	53.4658	65.1585	51.5984	33.2425
Dnmt3a	9.55044	9.82546	2.30998	1.45735
Ier5	31.6391	35.9768	21.5303	13.8123
Zfp36l2	127.185	140.043	67.137	43.9923
Naa30	9.10631	7.75664	6.84688	4.28576
Lgmn	2.66488	1.42785	1.03566	0.336598
Mfsd3	0.872261	1.951	9.39581	5.85725
Mtch1	23.039	25.562	8.77013	5.20769
Ppp2ca	73.1044	77.4865	29.8291	19.2162
Upf1	30.4929	34.6368	18.1094	11.9134
Elk4	37.7807	38.8281	7.85175	4.96463
Crtap	6.07925	7.18271	5.68459	3.13368
Fbxo28	14.9997	15.222	11.4698	7.42271
Ppm1a	31.6958	34.23	12.5561	7.89036
Tmem110	4.79725	5.7236	6.04003	3.77026
Ybx3	8.8991	10.4453	4.81219	2.66737
Dhx36	13.2167	11.9103	9.85384	6.37121
Hist1h1e	1.53431	0.673826	7.82636	4.51029
Aggf1	17.2567	16.7357	13.3024	8.65076
Eif3f	309.508	348.916	80.0697	53.4314
Chd1	19.5503	21.2255	11.6038	7.71948
Xkrx	29.6917	22.8467	9.14887	5.57637
Dexi	14.8414	14.6405	6.40572	3.48248
Pkig	0.257817	0.276976	4.75549	2.56436
Hnrnpd	23.142	20.0104	4.38485	2.80326
Pigl	10.0626	11.5067	7.69265	4.63481
Rnf187	81.352	90.5304	55.32	37.0331
Usp7	62.2089	61.4738	9.27346	6.10046
Zmym1	6.5845	7.69958	17.1426	11.5866
Map1lc3a	7.11689	6.31332	12.2016	7.32849
Wnk1	49.6126	52.8278	5.09665	3.34186
Retsat	1.63715	1.9421	6.90382	4.28413
Slc25a28	18.7297	24.3457	12.3775	7.70376
Zfp438	2.20106	2.16174	4.63655	3.01884
Ptpra	39.4597	40.4553	24.2991	16.4959
D14Abb1e	23.4752	18.6244	10.3098	6.98872
Itgav	4.74205	4.85193	2.63821	1.64306
Fyn	58.6169	60.5059	76.8984	52.6964
Psip1	51.0335	44.8937	25.3562	17.2338
Nat9	4.81422	5.42316	10.8242	6.84503
Rab24	15.1225	16.8683	36.1521	24.5342
Map3k3	50.5936	58.0019	15.8717	10.6206
Zdhhc7	13.2714	15.4798	23.1035	15.6507
Ctbp1	67.1816	77.6582	41.0429	27.9149
Otud5	81.451	87.5951	38.0034	25.8249
Etnk1	30.2973	30.4451	6.09071	4.0259
Mapk1	32.9155	33.1729	23.9072	16.3409
Zranb1	24.2734	21.1592	7.11392	4.43256
Top2b	104.612	105.228	27.2806	18.6015
Habp4	15.2852	15.3265	12.5796	8.26873
Tnks2	39.637	40.2201	11.4151	7.7784
Pdgfb	0.599898	0.36854	4.06575	2.56106
Pvr	3.84161	4.34576	7.05943	4.63944
Smarcd2	53.6412	61.3441	42.4845	29.1351
Vmn1r58	26.9141	19.6417	13.8735	9.61659
Slc30a9	17.7429	18.6115	16.5961	11.3308
Klrb1f	0.9769	0.484682	8.39927	5.47716
Actr5	10.8771	12.4263	5.35527	3.31085
Parp16	8.2619	6.5165	12.0688	8.24707
Fam134b	23.9699	23.8226	9.96198	6.72866
Samd11	0.62245	0.390223	10.7645	7.15963
Samd4b	14.1229	15.4301	3.75851	2.43894
Faim3	3.10779	2.28547	2.33169	1.19338
Tab2	46.4408	47.0677	14.4224	9.82618
Fam117b	23.4638	22.0282	5.13631	3.4398
Rnf11	6.23632	5.62003	7.97707	4.97357
Gls	20.5743	17.0068	5.23851	3.48187
Ubfd1	9.47245	9.85994	9.13062	6.37273
Ube2r2	31.6452	35.0195	13.1578	8.95777
Slc35d1	7.25286	4.24442	4.34909	2.81593
Clptm1l	38.8562	38.705	15.8769	10.642
Mnat1	4.07119	3.39868	8.9607	6.02427
Cd19	2.1683	1.03971	2.17415	1.25944
Rras2	65.8915	63.9455	15.2023	10.3459
Pcbp1	95.9483	114.678	22.9755	15.6615
Dnajb12	20.4111	21.3101	16.0753	11.1813
Ahcyl1	25.0308	25.3192	7.67171	5.18627
Odc1	6.93216	8.3082	14.139	9.61761
Ube2q1	35.4042	36.4516	12.4402	8.45993
Mapkapk2	23.8594	26.9295	9.37412	6.17197
Ankib1	12.4615	12.5824	5.93072	4.07317
Sntb2	4.36003	4.74364	7.72171	5.24842
Camsap2	8.11803	7.55875	4.86031	3.38047
Ypel1	0.539524	0.652322	9.82314	6.73634
Bcl3	2.15674	1.39517	2.09417	1.0535
Tmed7	14.9933	16.3483	5.23726	3.38821
Arrdc2	9.71569	10.1263	8.83303	5.8347
Snx18	5.36529	5.94488	2.97126	1.84874
Ppp2r2d	15.167	16.0195	6.86993	4.4805
Mxi1	9.87208	9.28148	4.84223	3.30256
Ubxn2a	12.4172	11.8507	13.6421	9.45908
Rbm26	14.3207	12.9986	4.78855	3.22691
Fbxo11	24.5672	21.6663	6.72182	4.56971
Egr2	1.03747	0.828868	1.88776	1.1586
Lrrc8d	3.99715	3.9415	4.72908	3.20573
Wsb2	10.0516	10.9458	10.2169	7.00242
Fbxw8	2.02424	1.90795	4.98739	3.41396
Ppm1d	12.9537	13.4315	6.62915	4.42218
Slc15a4	3.85842	4.83054	5.76696	3.82796
Dapk3	10.5008	13.8789	4.94181	3.16558
Cdk2ap1	31.8979	35.0056	9.46296	6.12229
Rassf3	21.8146	21.716	3.88036	2.61385
Bod1	7.82532	8.73859	7.55807	4.89384
Slc15a2	16.2787	13.9214	4.46081	3.00711
Podnl1	3.54043	4.60265	4.65224	3.00348
Adipor2	29.0582	29.568	4.07287	2.7395
Smco4	6.02307	7.67682	7.73869	4.56179
Mgat4b	3.08812	3.33701	3.87853	2.59155
Tnfsf9	0.442892	0.589499	8.90628	6.0206
Mrs2	7.84809	10.1297	4.21154	2.7487
Yrdc	14.0563	15.2191	7.44961	5.15125
Dcxr	1.02737	0.39815	9.26498	6.36275
Rnf141	4.86616	5.27545	7.89685	5.36613
Clec2d	72.7021	73.9725	4.18436	2.41724
Mlycd	8.88595	10.1852	5.45408	3.63799
Mipol1	2.63823	2.95383	7.08123	4.94767
H2-DMb2	1.36325	1.29821	3.21117	1.85451
Slco4a1	0.602523	0.803063	2.56581	1.7761
Prkaca	19.5511	20.9504	3.71705	2.45194
Frat2	17.8635	18.3435	4.52958	3.0928
Tmem45b	4.13524	1.27719	3.19075	2.16291
Prrt1	3.90701	6.61329	5.27588	3.33678
Smim19	11.1755	10.5689	5.08618	3.52519
Snx9	4.11864	4.49827	3.0055	2.04468
Tcp11	1.65066	1.71863	2.70798	1.83806
Timp2	13.1305	16.0504	0.804333	0.475188
Blvrb	4.54954	4.69823	4.54925	3.0642
Ly96	1.47729	0.675119	9.47245	6.84861
Rarres2	0.0949228	0.0200952	8.35075	6.04973
Lyz2	1.37599	1.06449	2.05025	1.28022
Ccl1	0.00991969	0.00991969	1.22438	0.719623

## Sheet: naïve vs. memory, shared 22
symbol	media.24h	media.TSLP.24h	media.24h.1	media.TSLP.24h.1
Zfp457	153.403	14.7639	3.31992	1.44437
Ap1s3	86.915	12.7333	5.45735	3.93796
Zfp488	91.6548	18.9203	25.4865	16.5517
Bcl2	8.3815	35.2649	10.967	39.3012
Cpox	30.9229	8.80031	7.45314	5.02322
Socs3	22.4031	41.7939	15.947	25.0154
Sfxn2	16.0387	7.59778	3.90702	6.99693
Bloc1s3	23.1581	10.5218	6.11491	2.88608
Olfr613	6.62847	3.43568	7.70037	5.5157
Tfrc	7.03785	11.7916	2.01073	3.56075
Alcam	1.10626	0.167843	3.07779	1.70644
H2-Ab1	5.41324	3.41686	9.70985	15.7262
Bcat1	0.316934	0.074819	0.215552	0.160901
Nr4a2	0.971763	0.329159	0.946492	0.699774
Pole2	3.52583	5.6905	4.15072	6.24694
Fcer1g	3.96637	1.99937	1.5762	3.56462
Gadd45g	1.42176	0.489512	1.82461	3.01665
Nfil3	1.65494	1.18652	6.46555	3.71157
Hspa1b	0.189123	0.0312877	0.160172	1.08551
Isg15	2.0976	1.5857	2.92073	5.10783
Socs2	0.464441	0.226046	1.02792	2.77551
Nek6	0.0131607	0.0722493	2.33622	3.5248
