# Supplementary material for: Thymic stromal lymphopoietin limits primary and recall CD8+ T-cell anti-viral responses
Source: eLife. 2021 Jan 13;10:e61912. doi: 10.7554/eLife.61912 (PMC7806261; doi:10.7554/eLife.61912)
Supplement: Supplementary file 4. — Related to Figure 4E–G. [file elife-61912-supp4.xlsx]

## Sheet: WT.vs.KO.FDR0.05.FC1.5
gene_name	symbol	WT1	WT2	KO1	KO2	logFC	logCPM	PValue	FDR
NM_001164735	Crlf2	78.3271	68.8694	1.71138	1.05424	-5.70025	5.73315	0	0
NM_183151	Mid1	21.318	21.9047	7.8661	5.49135	-1.66595	5.87046	1.05902e-78	3.91733e-75
NM_026146	Eps8l1	0.605019	0.577877	5.59727	4.86395	3.16468	2.95281	2.42943e-60	4.49324e-57
NM_001174053	Camk2b	1.58857	1.40948	5.3838	5.01412	1.80676	3.81642	2.61635e-42	3.87115e-39
NM_009003	Rab4a	0.667284	0.870119	6.0738	6.01243	3.0202	2.34769	9.1469e-40	1.12781e-36
NM_025876	Cdk5rap1	4.95196	3.99173	13.2806	12.558	1.53641	4.16701	3.67757e-38	3.88667e-35
NM_008207	H2-T24	21.8841	19.4372	41.4546	37.2722	0.946889	6.09515	2.22664e-30	2.05908e-27
NM_008399	Itgae	9.10082	3.2031	15.3515	8.71591	0.94859	5.20616	4.80351e-25	3.94849e-22
NM_001113401	Eaf2	1.55012	1.29706	5.08842	4.94957	1.82361	2.68759	6.72623e-24	4.97606e-21
NM_029752	Bri3bp	5.38002	5.80733	9.16454	10.2104	0.813778	5.79654	2.62719e-21	1.76691e-18
NM_001112715	Ifitm1	363.09	344.945	527.117	543.373	0.615347	8.34419	6.49827e-18	3.69801e-15
NM_001163548	Cyth3	6.84488	6.01313	10.6647	10.4293	0.728148	5.17042	7.58878e-15	3.30246e-12
NM_025378	Ifitm3	79.5445	78.0438	108.871	133.865	0.639653	6.07691	9.44582e-15	3.88223e-12
NM_011897	Spry2	9.00909	7.34917	13.2152	14.8591	0.784789	4.6002	4.25682e-14	1.5746e-11
NM_009274	Srpk2	13.1054	14.4581	8.43915	9.59114	-0.592327	6.25205	2.86087e-13	1.00784e-10
NM_010768	Matk	10.0265	9.98036	14.4174	17.3899	0.684931	4.74081	1.49294e-11	4.24798e-09
NM_145923	Rell1	13.8193	13.9375	8.7112	9.19735	-0.613021	5.26889	3.57441e-11	9.7939e-09
NM_153590	Klre1	12.0274	10.0331	20.4711	17.8853	0.808851	3.8593	5.23617e-11	1.38347e-08
NM_144908	Galnt11	8.43306	7.3267	10.8794	12.9335	0.604152	4.71499	2.19345e-09	4.50753e-07
NM_030694	Ifitm2	31.8489	27.6246	44.9121	45.2536	0.612087	4.61775	2.805e-09	5.4609e-07
NM_025429	Serpinb1a	7.39891	7.99673	4.80731	4.16614	-0.749321	3.61755	8.77164e-09	1.52594e-06
NM_007720	Ccr8	11.3168	12.2123	17.3939	19.1196	0.657004	4.17907	8.86932e-09	1.52594e-06
NM_024223	Crip2	17.5275	18.2904	9.80982	13.5269	-0.603827	4.47195	2.14228e-08	3.30179e-06
NM_025972	Naaa	4.74683	4.597	7.4447	6.91292	0.639658	3.91337	1.36412e-07	1.77048e-05
NM_028448	Cenpv	8.07987	9.2278	5.49063	4.76405	-0.72044	2.91135	5.59162e-06	0.000486668
NM_001199123	Spc25	5.57618	7.47757	3.83302	4.24007	-0.655137	3.12751	8.64628e-06	0.000702914
NM_023326	Bmyc	4.72913	4.99758	6.75067	9.33188	0.740709	2.51812	3.49149e-05	0.0022658
NM_026073	Rabl5	3.14847	2.85553	4.8884	4.93787	0.722364	1.95502	0.000752815	0.0279866
NM_025421	Acyp1	7.66883	9.54609	6.07713	4.74227	-0.623692	2.2728	0.000923452	0.0319238
